# Supplementary material for: Tracking development assistance for reproductive, maternal, newborn, child and adolescent health in conflict-affected countries
Source: PubMed Central journal article supplement — BMJ Glob Health. 2019 Aug 31;4(4):e001614. doi: 10.1136/bmjgh-2019-001614 (PMC6730579; doi:10.1136/bmjgh-2019-001614), 2019-08-31
Supplement: bmjgh-2019-001614supp001.pdf [file bmjgh-2019-001614supp001.pdf]

**Appendix Table 1. 25 conflict-affected countries involved in the study**

| <b>WHO region</b>     | <b>Country</b>                   | <b>Sub-Saharan African country</b> | <b>Income classification in 2017<sup>1</sup></b> |
|-----------------------|----------------------------------|------------------------------------|--------------------------------------------------|
| Africa                | Angola                           | Yes                                | UM                                               |
| Africa                | Burundi                          | Yes                                | L                                                |
| Africa                | Central African Republic         | Yes                                | L                                                |
| Africa                | Chad                             | Yes                                | L                                                |
| Africa                | Democratic Republic of the Congo | Yes                                | L                                                |
| Africa                | Eritrea                          | Yes                                | L                                                |
| Africa                | Liberia                          | Yes                                | L                                                |
| Africa                | Nigeria                          | Yes                                | LM                                               |
| Africa                | Sierra Leone                     | Yes                                | L                                                |
| Africa                | Somalia                          | Yes                                | L                                                |
| Africa                | South Sudan                      | Yes                                | L                                                |
| Africa                | Sudan                            | Yes                                | LM                                               |
| Africa                | Uganda                           | Yes                                | L                                                |
| Americas              | Colombia                         | No                                 | UM                                               |
| Europe                | Ukraine                          | No                                 | LM                                               |
| Eastern Mediterranean | Afghanistan                      | No                                 | L                                                |
| Eastern Mediterranean | Iraq                             | No                                 | UM                                               |
| Eastern Mediterranean | Libya                            | No                                 | UM                                               |
| Eastern Mediterranean | Pakistan                         | No                                 | LM                                               |
| Eastern Mediterranean | Syrian Arab Republic             | No                                 | LM                                               |
| Eastern Mediterranean | Yemen                            | No                                 | LM                                               |
| South-East Asia       | Myanmar                          | No                                 | LM                                               |
| South-East Asia       | Nepal                            | No                                 | L                                                |
| South-East Asia       | Sri Lanka                        | No                                 | LM                                               |
| South-East Asia       | Timor-Leste                      | No                                 | LM                                               |

**Note:**

1. “L” represents “Low-income country”, “LM” represents “Lower-middle income country”, “UM” represents “Upper-middle income country”.

**Appendix Table 2. List of donor countries included in the analysis**

| DAC members     |                 | Non-DAC multilateral donors                         |                 | Non-DAC donors       |                 | Private donors                  |           |
|-----------------|-----------------|-----------------------------------------------------|-----------------|----------------------|-----------------|---------------------------------|-----------|
| Australia       | 2003-2017       | Adaptation fund                                     | 2011-2014, 2016 | Azerbaijan           | 2014-2015, 2017 | Bill & Melinda Gates Foundation | 2009-2017 |
| Austria         | 2003-2017       | African Development Bank                            | 2003-2017       | Bulgaria             | 2015-2017       |                                 |           |
| Belgium         | 2003-2017       | African Development Fund                            | 2003-2017       | Cyprus               | 2014-2015       |                                 |           |
| Canada          | 2003-2017       | Arab Bank for Economic Development in Africa        | 2011-2015       | Estonia              | 2013-2017       |                                 |           |
| Czech Republic  | 2011-2017       | Arab Fund (AFESD)                                   | 2008-2017       | Israel               | 2015-2016       |                                 |           |
| Denmark         | 2003-2017       | AsDB Special Funds                                  | 2003-2016       | Kazakhstan           | 2013-2015, 2017 |                                 |           |
| EU Institutions | 2003-2017       | Asian Development Bank(AsDB)                        | 2003-2017       | Kuwait (KFAED)       | 2010-2017       |                                 |           |
| Finland         | 2003-2017       | Council of Europe Development Bank                  | 2010-2015       | Latvia               | 2015-2017       |                                 |           |
| France          | 2003-2017       | Climate Investment Funds                            | 2012-2017       | Lithuania            | 2014-2017       |                                 |           |
| Germany         | 2003-2017       | European Bank for Reconstruction and Development    | 2009-2017       | Malta                | 2015-2017       |                                 |           |
| Greece          | 2003-2017       | Food and Agriculture Organization                   | 2013            | Romania              | 2014-2017       |                                 |           |
| Hungary         | 2014-2017       | Global Alliance for Vaccines and Immunisation       | 2003-2017       | Russia               | 2015-2017       |                                 |           |
| Iceland         | 2011-2017       | Global Environment Facility                         | 2003-2017       | Thailand             | 2015-2017       |                                 |           |
| Ireland         | 2003-2017       | Global Fund to Fight AIDS, Tuberculosis and Malaria | 2003-2017       | Turkey               | 2015-2017       |                                 |           |
| Italy           | 2003-2017       | Global Green Growth Institute                       | 2013-2017       | United Arab Emirates | 2009-2017       |                                 |           |
| Japan           | 2003-2017       | Green Climate Fund                                  | 2016-2017       |                      |                 |                                 |           |
| Korea           | 2003, 2006-2017 | IDB Invest                                          | 2016-2017       |                      |                 |                                 |           |
| Luxembourg      | 2003-2017       | IDB Special Fund                                    | 2009-2016       |                      |                 |                                 |           |
| Netherlands     | 2003-2017       | International Development Association               | 2003-2017       |                      |                 |                                 |           |

**Appendix Table 2. List of donor countries included in the CRS (continued)**

| DAC members     |           | Non-DAC multilateral donors                           |           | Non-DAC donors |  | Private donors |  |
|-----------------|-----------|-------------------------------------------------------|-----------|----------------|--|----------------|--|
| New Zealand     | 2003-2017 | International Fund for Agricultural Development       | 2003-2017 |                |  |                |  |
| Norway          | 2003-2017 | International Labour Organization                     | 2012-2017 |                |  |                |  |
| Poland          | 2013-2017 | International Monetary Fund                           | 2003-2017 |                |  |                |  |
| Portugal        | 2003-2017 | International Atomic Energy Agency                    | 2015-2017 |                |  |                |  |
| Slovak Republic | 2013-2017 | International Bank for Reconstruction and Development | 2003-2017 |                |  |                |  |
| Slovenia        | 2010-2017 | International Finance Corporation                     | 2012-2015 |                |  |                |  |
| Spain           | 2003-2017 | Islamic Development Bank                              | 2003-2017 |                |  |                |  |
| Sweden          | 2003-2017 | Montreal Protocol                                     | 2015      |                |  |                |  |
| Switzerland     | 2003-2017 | Joint United Nations Programme on HIV/AIDS            | 2003-2017 |                |  |                |  |
| United Kingdom  | 2003-2017 | Nordic Development Fund                               | 2009-2017 |                |  |                |  |
| United States   | 2003-2017 | OPEC Fund for International Development               | 2009-2017 |                |  |                |  |
|                 |           | Organization for Security and Co-operation in Europe  | 2010-2017 |                |  |                |  |
|                 |           | Swedish Postcode Lottery                              | 2016-2017 |                |  |                |  |
|                 |           | United Nations Children's Fund                        | 2003-2017 |                |  |                |  |
|                 |           | United Nations Development Programme                  | 2004-2017 |                |  |                |  |
|                 |           | United Nations Peacebuilding Fund                     | 2007-2017 |                |  |                |  |
|                 |           | United Nations Population Fund                        | 2003-2017 |                |  |                |  |
|                 |           | United Nations Relief and Works Agency                | 2005-2017 |                |  |                |  |
|                 |           | World Food Programme                                  | 2008-2017 |                |  |                |  |
|                 |           | World Health Organization                             | 2011-2017 |                |  |                |  |

**Appendix Table 3. Keywords used to search for reproductive health projects, including HIV/AIDS, in the Creditor Reporting System**

|                                     |                         |                                      |                                       |                                            |                                  |                             |
|-------------------------------------|-------------------------|--------------------------------------|---------------------------------------|--------------------------------------------|----------------------------------|-----------------------------|
| abstinence                          | copper IUD              | Hepatitis B transmission             | Millennium Development Goal 6         | prevent youth pregnancy                    | safe blood supply                | unprotected sexual activity |
| abstinent                           | counselling and testing | herpes transmission                  | morning-after pill                    | preventing HIV                             | safe injection                   | unsafe sex                  |
| acquired immune deficiency syndrome | CVR                     | highly active antiretroviral therapy | most at risk                          | prevention of mother-to-child transmission | safe sex                         | unwanted pregnancy          |
| acquired immunodeficiency syndrome  | D&C                     | hiv                                  | mother to child aids transmission     | progestin-only pill                        | safer sex                        | unwanted sex                |
| aids                                | dental dam              | hiv education                        | mother to child hiv aids transmission | progestogen hormone                        | SDM                              | urinate after sex           |
| aids education                      | depo Provera injection  | HIV transmission                     | mother to child transmission          | progestogen only injectables               | sex worker                       | urinate shortly after sex   |
| antiretroviral therapy              | diaphragm               | HIV/AIDS                             | mother-to-child aids transmission     | progestogen-only contraceptive pill        | sexual assault                   | urination after sex         |
| ART                                 | dilation and curettage  | homosexual                           | mother-to-child transmission          | progestogen-only pills                     | sexually transmissible infection | urination shortly after sex |
| ARV                                 | drug regimens           | hormonal contraception               | multiple partners                     | prostitute                                 | sexually transmitted disease     | UTI                         |
| barrier method                      | EC                      | HPV transmission                     | NFP                                   | protected sex                              | sexually transmitted infection   | vaginal ring                |
| basal body temperature              | ECP                     | human immunodeficiency virus         | oral contraceptive pill               | psychological service                      | spermicide                       | vasectomy                   |
| BBT                                 | emergency contraception | implant                              | outcourse                             | psychological support                      | STD                              | vct                         |
| BCC                                 | essential service       | infected children                    | ovc                                   | psychosocial service                       | sterilization                    | vesectomy                   |
| birth control                       | estrogen                | infected person                      | ovulation                             | psychosocial support                       | STI                              | viral burden                |
| birth control pill                  | family planning         | injectable contraceptives            | pain relief                           | pull out method                            | STM                              | viral load                  |

**Appendix Table 3. Keywords used to search for reproductive health projects, including HIV/AIDS, in the Creditor Reporting System (continued)**

|                     |                           |                                      |                                |                                  |                             |                                   |
|---------------------|---------------------------|--------------------------------------|--------------------------------|----------------------------------|-----------------------------|-----------------------------------|
| blood safety        | family size               | intra uterine device                 | parent to child transmission   | rape                             | Sympto-Thermal Method       | viral titer                       |
| C virus             | FAMs                      | IUD                                  | parent-to-child transmission   | reduce adolescent pregnancies    | testing and counseling      | voluntary counselling and testing |
| calendar method     | female condom             | lactational amenorrhea               | pee after sex                  | reduce adolescent pregnancy      | testing and counselling     | withdrawal                        |
| cd4 count           | fertility awareness       | LAM                                  | pee shortly after sex          | reduce pregnancies               | the minipill                |                                   |
| cervical cap        | fetile days               | LARC                                 | people living with HIV/AIDS    | reduce pregnancy                 | transmission of Hepatitis B |                                   |
| chlamydia           | fetile period             | levonorgestrel                       | PEP                            | reduce the transmission of hiv   | transmission of herpes      |                                   |
| chronically ill     | forced sex                | levonorgestrel                       | Plan B                         | reduce youth pregnancies         | transmission of HIV         |                                   |
| CIC                 | forced to sex             | long-acting reversible contraception | PLHA                           | reducing the transmission of hiv | transmission of HPV         |                                   |
| clinical monitoring | forcedsex                 | make sex safer                       | pmtct                          | retroviral                       | tubal ligation              |                                   |
| COCs                | gay                       | male circumcision                    | POPs                           | retrovirale                      | TwoDay method               |                                   |
| coitus interruptus  | GFATM                     | male condom                          | post-exposure prophylaxis      | retroviralen                     | ulipristal acetate          |                                   |
| condom              | Global Fund to Fight AIDS | manual penetration                   | prevent adolescent pregnancies | reverse transcriptase inhibitor  | UNAIDS                      |                                   |
| contraception       | gonorrhoea                | material support                     | prevent adolescent pregnancy   | rhythm method                    | underage sex                |                                   |
| contraceptive       | haart                     | MDG6                                 | prevent pregnancies            | risky sex                        | unintended pregnancy        |                                   |
| contraceptive pill  | HBV                       | microbicide                          | prevent pregnancy              | risky sexual behavior            | unprotected sex             |                                   |

**Note:**

1. We have translated all the keywords listed above to Spanish, French, Portuguese, Italian, Dutch, German, Norwegian, and Swedish
2. We performed keywords searching using 1) all lower case; 2) all upper case; 3) capitalize the first letter of each word 4) capitalize the first letter of the term
3. To prevent missing keywords containing unrecognizable characters (e.g. "c?ndom"), we replaced each letter of the keywords in the table with "?", "??", "?" or spacing.

**Appendix Table 3. Keywords used to search for reproductive health projects, including HIV/ADIS, in the Creditor Reporting System (continued)**

## 4. Reference:

- a. Global Burden of Disease Collaborative Network. Global Burden of Disease Study 2017 (GBD 2017) Results. [Internet]. Seattle, United States: Institute for Health Metrics and Evaluation (IHME). 2018 [cited 2018 Dec 19]. Available from: <http://ghdx.healthdata.org/gbd-results-tool>
- b. Dieleman JL, Schneider MT, Haakenstad A, Singh L, Sadat N, Birger M, et al. Development assistance for health: past trends, associations, and the future of international financial flows for health. *Lancet*. 2016 Jun;387(10037):2536–44.
- c. Dieleman JL, Graves CM, Templin T, Johnson E, Baral R, Leach-Kemon K, et al. Global Health Development Assistance Remained Steady In 2013 But Did Not Align With Recipients' Disease Burden. *Health Aff*. 2014 May 2;33(5):878–86.
- d. Ravishankar N, Gubbins P, Cooley RJ, Leach-Kemon K, Michaud CM, Jamison DT, et al. Financing of global health: tracking development assistance for health from 1990 to 2007. *Lancet*. 2009 Jun;373(9681):2113–24.
- e. Lu C, Chu A, Li Z, Shen J, Subramanian S, Hill K. Assessing development assistance for child survival between 2000 and 2014: A multi-sectoral perspective. Fan VY, editor. *PLoS One*. 2017 Jul 11;12(7):e0178887.
- f. World Health Organization. Communicable Diseases [Internet]. [cited 2019 Mar 28]. Available from: <https://www.afro.who.int/health-topics/communicable-diseases>
- g. ICD. 2018 ICD-10-CM Codes [Internet]. [cited 2018 Jan 11]. Available from: <http://www.icd10data.com/ICD10CM/Codes>
- h. Centers for Disease Control and Prevention. Guidelines for prevention and treatment opportunistic infections in HIV-infected adults and adolescents; recommendations from CDC, the National Institutes of Health, and the HIV Medicine Association/Infectious Diseases Society of America [Internet]. CDC Stacks Public Health Publications. 2009 [cited 2017 Nov 1]. Available from: <https://stacks.cdc.gov/view/cdc/5236>
- i. World Health Organization. Guidelines for prevention and treatment opportunistic infections in HIV-infected adults and adolescents; recommendations from CDC, the National Institutes of Health, and the HIV Medicine Association/Infectious Diseases Society of America [Internet]. 2012 [cited 2017 Nov 1]. Available from: <http://www.who.int/hiv/en/>

**Appendix Table 4. Keywords used to search for maternal and newborn health in the Creditor Reporting System**

|                 |                            |                                  |                |                          |
|-----------------|----------------------------|----------------------------------|----------------|--------------------------|
| abortion        | gynecologist               | MDG4&5                           | obstetric      | safe mother              |
| antenatal       | induction                  | MDG5                             | obstetric care | safe motherhood          |
| assisted birth  | IPTP                       | midwife                          | parenthood     | SBA                      |
| birth attendant | kangaroo care              | midwifery                        | peri-natal     | skilled birth attendance |
| birth delivery  | less than 1 month          | Millennium Development Goal 4& 5 | perinatal      | traditional birth        |
| breastfeed      | less than one month        | Millennium Development Goal 5    | pmtct          | unwanted pregnancy       |
| breastfeeding   | maternal                   | Millennium Development Goal4&5   | post-natal     | utero                    |
| child birth     | maternal and child health  | Millennium Development Goal5     | postnatal      | vaginal delivery         |
| childbirth      | maternal and infant health | mnch                             | postpartum     |                          |
| delivery        | maternal death             | mnh                              | pre-natal      |                          |
| fetal           | maternal health            | mother to child transmission     | pregnancies    |                          |
| geburt          | maternal mortality         | mother-to-child transmission     | pregnancy      |                          |
| gestational     | maternity                  | motherhood                       | pregnant       |                          |
| gyn             | MDG 4 & 5                  | neonatal                         | prenatal       |                          |
| gynaecolog      | MDG 5                      | newborn                          | safe delivery  |                          |

**Note:**

1. We have translated all the keywords listed above to Spanish, French, Portuguese, Italian, Dutch, German, Norwegian, and Swedish
2. We performed keywords searching using 1) all lower case; 2) all upper case; 3) capitalize the first letter of each word 4) capitalize the first letter of the term
3. To prevent missing keywords containing unrecognizable characters (e.g. “n?wborn”), we replaced each letter of the keywords in the table with “?”, “??” “/” or spacing.

**Appendix Table 4. Keywords used to search for maternal and newborn health in the Creditor Reporting System (continued)**

## 4. Reference:

- a. Global Burden of Disease Collaborative Network. Global Burden of Disease Study 2017 (GBD 2017) Results. [Internet]. Seattle, United States: Institute for Health Metrics and Evaluation (IHME). 2018 [cited 2018 Dec 19]. Available from: <http://ghdx.healthdata.org/gbd-results-tool>
- b. Dieleman JL, Schneider MT, Haakenstad A, Singh L, Sadat N, Birger M, et al. Development assistance for health: past trends, associations, and the future of international financial flows for health. *Lancet*. 2016 Jun;387(10037):2536–44.
- c. Dieleman JL, Graves CM, Templin T, Johnson E, Baral R, Leach-Kemon K, et al. Global Health Development Assistance Remained Steady In 2013 But Did Not Align With Recipients' Disease Burden. *Health Aff*. 2014 May 2;33(5):878–86.
- d. Ravishankar N, Gubbins P, Cooley RJ, Leach-Kemon K, Michaud CM, Jamison DT, et al. Financing of global health: tracking development assistance for health from 1990 to 2007. *Lancet*. 2009 Jun;373(9681):2113–24.
- e. Lu C, Chu A, Li Z, Shen J, Subramanian S, Hill K. Assessing development assistance for child survival between 2000 and 2014: A multi-sectoral perspective. Fan VY, editor. *PLoS One*. 2017 Jul 11;12(7):e0178887.



**Appendix Table 5. Keywords to identify the related age group (children) in the Creditor Reporting System**

|            |                   |                |                |             |                                |
|------------|-------------------|----------------|----------------|-------------|--------------------------------|
| 1 year old | 8 year old        | five year old  | primary-school | under nine  | under-eight                    |
| 0 to 5     | 9 year old        | four year old  | school-aged    | under one   | under-five                     |
| 0-5        | between 0 and 5   | five to nine   | three year old | under seven | under-four                     |
| 1 to 4     | between 1 and 4   | girl           | two year old   | under six   | under-nine                     |
| 1 to 5     | between 1 and 5   | infant         | under 1        | under ten   | under-one                      |
| 1-4        | between 5 and 10  | kid            | under 10       | under three | under-seven                    |
| 1-5        | between 5 and 9   | kindergarten   | under 2        | under two   | under-six                      |
| 2 year old | boy               | less than 1    | under 3        | under-1     | under-ten                      |
| 3 year old | CH                | less than one  | under 4        | under-10    | under-three                    |
| 4 year old | child             | MCH            | under 5        | under-2     | under-two                      |
| 5 to 10    | childhood         | MNCH           | under 6        | under-3     | UNICEF                         |
| 5 to 9     | children          | one to five    | under 7        | under-4     | United Nations Children's Fund |
| 5 year old | daycare           | one to four    | under 8        | under-5     |                                |
| 5-10       | early childhood   | one year old   | under 9        | under-6     |                                |
| 5-9        | elementary school | orphan         | under eight    | under-7     |                                |
| 6 year old | elementary-school | orphant        | under five     | under-8     |                                |
| 7 year old | five to ten       | primary school | under four     | under-9     |                                |

**Note:**

1. We have translated all the keywords listed above to Spanish, French, Portuguese, Italian, Dutch, German, Norwegian, and Swedish
2. We performed keywords searching using 1) all lower case; 2) all upper case; 3) capitalize the first letter of each word 4) capitalize the first letter of the term
3. To prevent missing keywords containing unrecognizable characters (e.g. "b?y"), we replaced each letter of the keywords in the table with "?", "??" "/" or spacing.
4. Reference:
  - a. Lu C, Chu A, Li Z, Shen J, Subramanian S, Hill K. Assessing development assistance for child survival between 2000 and 2014: A multi-sectoral perspective. Fan VY, editor. PLoS One. 2017 Jul 11;12(7):e0178887.

**Appendix Table 6. Keywords to identify the related age group (adolescence) in the Creditor Reporting System**

|                 |                 |                   |                         |                         |                   |
|-----------------|-----------------|-------------------|-------------------------|-------------------------|-------------------|
| adolescent      | 10-24 years old | 20-24 years old   | excluded youth          | out-of-school youth     | undergraduate     |
| 10 to 14        | 15 to 19        | adolescence       | fifteen to nineteen     | over-age school student | vocational school |
| 10 to 15        | 15 to 20        | adolescente       | fifteen to twenty       | overage school student  | yorth             |
| 10 to 19        | 15 to 24        | between 10 and 14 | fifteen to twenty-four  | post-secondary school   | young             |
| 10 to 20        | 15-19           | between 10 and 15 | freshman                | secondary school        | young men         |
| 10 to 24        | 15-19 years old | between 10 and 19 | high school             | secondary-school        | young mother      |
| 10-14           | 15-20           | between 10 and 20 | high-school             | sophomore               | young women       |
| 10-14 years old | 15-20 years old | between 10 and 24 | middle school           | teen                    | youth             |
| 10-15           | 15-24           | between 15 and 19 | middle-school           | teenager                |                   |
| 10-15 years old | 15-24 years old | between 15 and 20 | nineteen to twenty-dour | ten to fifteen          |                   |
| 10-19           | 19 to 24        | between 15 and 24 | older boy               | ten to fourteen         |                   |
| 10-19 years old | 19-24           | between 19 and 24 | older girl              | ten to nineteen         |                   |
| 10-20           | 19-24 years old | between 20 and 24 | out of school young     | ten to twenty           |                   |
| 10-20 years old | 20 to 24        | college           | out of school youth     | ten to twenty-four      |                   |
| 10-24           | 20-24           | excluded young    | out-of-school young     | twenty to twenty-four   |                   |

**Note:**

1. We have translated all the keywords listed above to Spanish, French, Portuguese, Italian, Dutch, German, Norwegian, and Swedish
2. We performed keywords searching using 1) all lower case; 2) all upper case; 3) capitalize the first letter of each word 4) capitalize the first letter of the term
3. To prevent missing keywords containing unrecognizable characters (e.g. “t?eenager”), we replaced each letter of the keywords in the table with “?”, “??” “/” or spacing.
4. Reference:
  - a. Li Z, Li M, Patton GC, Lu C. Global Development Assistance for Adolescent Health From 2003 to 2015. *JAMA Netw Open*. 2018 Aug 10;1(4):e181072.
  - b. Lu C, Li Z, Patel V. Global child and adolescent mental health: The orphan of development assistance for health. *PLOS Med*. 2018 Mar 9;15(3):e1002524.

**Appendix Table 7. Keywords to identify projects on health in the Creditor Reporting System**

|                                               |                                          |                                          |                                   |                                       |                                         |
|-----------------------------------------------|------------------------------------------|------------------------------------------|-----------------------------------|---------------------------------------|-----------------------------------------|
| abuse of drug                                 | chlorinated water                        | folliculitis ulerythematos<br>reticulata | keratosis punctata                | pedestrian safety                     | smitn                                   |
| abusing drug                                  | chlorine drop                            | food borne trematod                      | kick                              | pedophile                             | smoke                                   |
| abusive relationship                          | chlorine treatment                       | food-borne trematod                      | kicking                           | pemphigoid                            | smoker                                  |
| acantholytic disorder                         | cholera                                  | foodborne trematod                       | kidney damage                     | pemphigus                             | smoking                                 |
| acanthosis nigricans                          | chromhidrosis                            | foraminal stenosis                       | kidney disease                    | penicillin antibiotic                 | snail fever                             |
| access to water                               | chronic bullous<br>disease of childhood  | forced marriage                          | kidney failure                    | penicillin antibiotics                | sneddon-wilkinson disease               |
| accident at work                              | chronic disease                          | forced sex                               | kidney function                   | pentavalent                           | soap                                    |
| accidents at work                             | chronic diseases                         | forced sexual                            | lack of water                     | perifolliculitis capitis<br>abscedens | sodium hypochlorite                     |
| acetaminophen                                 | chronic obstructive<br>pulmonary disease | fox-fordyce disease                      | latrine                           | perioral dermatitis                   | solar urticaria                         |
| acne                                          | chronic respiratory                      | freckles                                 | laughing gas                      | personality disorder                  | somatoform                              |
| acne keloid                                   | cicatricial alopecia                     | frighten                                 | learning disability               | pertussis                             | spinal stenosis                         |
| acquired epidermolysis<br>bullosa             | circulatory                              | furuncle                                 | leishmaniasis                     | phenylketonuria                       | spondylolisthesis                       |
| acquired ichthyosis                           | cirrhosis                                | GAVI                                     | leishmaniosis                     | phobia                                | stalking                                |
| acquired immune<br>deficiency syndrome        | clean water                              | gender based violence                    | lentigo                           | photocontact dermatitis               | standpipe                               |
| acquired<br>immunodeficiency<br>syndrome      | cleft lip                                | gender empowerment                       | leukoderma                        | physical abuse                        | staphylococcal scalded skin<br>syndrome |
| acquired keratoderma<br>palmaris et plantaris | cleft palate                             | gender equality                          | lichen nitidus                    | physical disability                   | steatocystoma multiplex                 |
| acquired keratosis<br>palmaris et plantaris   | clubbed nail<br>pachydermoperiostosis    | gender project                           | lichen planopilaris               | physical violence                     | stenosis with myelopathy                |
| acrodermatitis continua                       | cocaine                                  | genitourinary                            | lichen planus                     | physician                             | stevens-johnson syndrome                |
| actinic granuloma                             | codeine                                  | GFR                                      | lichen sclerosus et<br>atrophicus | pica                                  | stimulant                               |
| actinic keratosis                             | coerced marriage                         | gianotti-crosti syndrome                 | lichen simplex<br>chronicus       | pidermal thickening                   | striae atrophicae                       |
| actinic reticuloid                            | coerced sex                              | girls empowerment                        | lichen striatus                   | pigmented purpuric<br>dermatosis      | stroke                                  |

**Appendix Table 7. Keywords to identify projects on health in the Creditor Reporting System (continued)**

|                             |                            |                              |                                    |                                               |                                |
|-----------------------------|----------------------------|------------------------------|------------------------------------|-----------------------------------------------|--------------------------------|
| acute bronchitis            | coerced sexual             | girls initiative programme   | ligament sprain                    | pilar cyst                                    | subcorneal pustular dermatitis |
| acute lower respiratory     | coercion                   | gland swelling               | lincosamide antibiotics            | pilonidal cyst                                | substance abuse                |
| acute lymphadenitis         | cognitive impairment       | glaucoma                     | linear scleroderma                 | pinched nerve                                 | sulfa antibiotic combinations  |
| acute respiratory infection | cold therapy               | Global Alliance for Vaccines | llin                               | piped sewer system                            | sunburn                        |
| acute skin                  | complete blood count       | glomerular filtration        | localized scleroderma              | piped water                                   | surface water                  |
| addiction                   | composting toilet          | glues                        | low back                           | pit latrine                                   | sweat disorder                 |
| advanced market commitment  | compression fracture       | glycopeptide antibiotics     | low glomerular filtration          | pityriasis alba                               | tablet                         |
| ainhum                      | conduct disorder           | gottron's papules            | lower back                         | pityriasis lichenoides chronica               | take away children             |
| albumin in the urine        | congenit                   | grains with iron             | lower back and neck pain           | pityriasis lichenoides et varioliformis acuta | tanker-truck                   |
| albumin in urine            | connective tissue disorder | granuloma                    | lower back muscle                  | pityriasis rosea                              | TB                             |
| alcohol                     | constant humiliation       | granuloma faciale            | lower respiratory infection        | pityriasis rubra pilaris                      | telogen effluvium              |
| alcohol abuse               | contaminated water         | granulomatous                | lower respiratory tract infections | plasmodium falciparum                         | terrorize                      |
| alcohol addiction           | controlling                | grey water                   | LRI                                | plasmodium vivax                              | tetanus toxoid                 |
| alcohol consumption         | copd                       | greywater                    | LRTI                               | pneumococcal                                  | thalassemia                    |
| alcohol control study       | corns and callosities      | growth monitoring            | LSD                                | pneumonia                                     | threat                         |
| alcohol dependence          | cough                      | haemophilia                  | lumbar disc herniation             | poikiloderma of civatte                       | tired                          |
| alcohol disorder            | cradle cap                 | hair color                   | lumbar herniated disc              | poikiloderma vasculare atrophicans            | tobacco                        |
| alcohol intake              | crystal                    | hair colour                  | lumbar Spine                       | polio                                         | toxic Water                    |
| alcohol testing             | CSA                        | hair loss                    | lung alveoli                       | polymorphous light eruption                   | trachea                        |

**Appendix Table 7. Keywords to identify projects on health in the Creditor Reporting System (continued)**

|                            |                             |                          |                             |                           |                                                              |
|----------------------------|-----------------------------|--------------------------|-----------------------------|---------------------------|--------------------------------------------------------------|
| alcohol use                | cutaneous abscess           | hair shaft               | lung infection              | polytrichia               | trachoma                                                     |
| alcohol volume             | cutaneous autosensitization | hallucination            | lymph node (gland) swelling | pompholyx                 | traffic accident                                             |
| alcoholism                 | cutis laxa senilis          | hamstring                | lymph node swelling         | poor hygiene              | traffic education                                            |
| alopecia (capitis) totalis | cutis rhomboidalis nuchae   | hand washing             | lymphatic filariasis        | post traumatic            | traffic injuries                                             |
| alopecia areata            | cylert                      | handwashing              | lysergic acid diethylamide  | posttraumatic             | transepidermal elimination                                   |
| alopecia mucinosa          | cysticercosis               | harm                     | macrolide antibiotics       | potable aqua              | transepidermal elimination disorder                          |
| alopecia nos               | death                       | head-on crash            | magic Mushroom              | primaquine                | transfusion                                                  |
| alopecia totalis           | decubitus ulcer             | health                   | magnesium sulphate          | protected dug wells       | transport among school children                              |
| alveolar sacs              | deformity                   | health at work           | malaria                     | protected spring          | transport services for boys and girls working in the streets |
| amoxicillin                | degenerative disc disease   | heart disease            | male privilege              | protein in the urine      | transportation safety                                        |
| amphetamine                | delay marriage              | heat therapy             | malnutrition screening      | protein in urine          | trauma                                                       |
| anagen effluvium           | delirium                    | hee-MAT-oh-crit          | mania                       | proteinuria               | treatment                                                    |
| androgenic alopecia        | delusion                    | helmet awareness raising | manipulate                  | prurigo                   | trichilemmal cyst                                            |
| anemia                     | dementia                    | helmet wearing campaign  | manipulation                | pruritus                  | trichorrhexis nodosa                                         |
| anetoderma                 | dengue                      | hematocrit               | marginalized girls          | pseudofolliculitis barbae | trichuriasis                                                 |
| anopheles                  | dental                      | heme iron                | marijuana                   | pseudopelade              | tropical disease                                             |
| antidepressant             | dependency                  | hematologic              | MDR TB                      | psilocybin                | trypanosomiasis                                              |
| antifolate                 | depress                     | hemoglobin               | measles-rubella vaccine     | psoriasis                 | tuberculosis                                                 |
| antipsychotic              | depressant                  | hemophilia               | medicine                    | psychia-                  | tubewell                                                     |
| anxiety                    | depression                  | HepB                     | melanin hyperpigmentation   | psychiatric               | tumor                                                        |
| anxiolytic                 | depressive disorder         | hernia                   | membrane filter             | psycho-                   | ulcer                                                        |

**Appendix Table 7. Keywords to identify projects on health in the Creditor Reporting System (continued)**

|                           |                                     |                          |                            |                                      |                                             |
|---------------------------|-------------------------------------|--------------------------|----------------------------|--------------------------------------|---------------------------------------------|
| apocrine miliaria         | depth Filter                        | herniated disc           | Meningitis A               | psycholog-                           | ultraviolet                                 |
| ARI                       | dermatitis                          | heroin                   | mental                     | PTSD                                 | UN programme on adolescent girls            |
| artemisinin               | dermatitis<br>herpetiformis         | Hib                      | mental harm                | public tap                           | UNAID                                       |
| arthritis                 | dermatophytid                       | hidradenitis suppurativa | mental health              | pulled back muscle                   | UNAIDS                                      |
| ascariasis                | developmental<br>disorder           | hirsutism                | mescaline                  | pulmonary disease                    | unclean water                               |
| asperger                  | diabet                              | hit                      | methamphetamine            | PUR Scout                            | underage drinking                           |
| assault                   | diagnosis                           | hitting                  | microscopy                 | PUR-Hiker                            | UNICEF                                      |
| asthma                    | diagnostic                          | homicide                 | miliaria                   | push                                 | unimproved sanitation                       |
| atrophic disorder of skin | diaper rash                         | hookworm                 | molest                     | pustulosis palmaris et<br>plantaris  | United Nations Children's Fund              |
| AUD                       | diaphragm                           | HPV                      | monitor movements          | pyoderma                             | United Nations Programme on<br>HIV and AIDS |
| autism                    | diarrhea                            | humiliate                | monitoring<br>movements    | pyoderma gangrenosum                 | unsafe drinking water                       |
| autoimmun                 | diarrhoea                           | humiliation              | monobactam<br>antibiotics  | pyogenic granuloma                   | unsafe sanitation                           |
| avian                     | dietary iron                        | hurt                     | mood                       | quinolone qntibiotics                | unsafe water                                |
| Bacillus Calmette-Guerin  | digestive                           | hydatid disease          | morbidity                  | rabies                               | urine test                                  |
| back muscle               | digestive disease                   | hydatidosis              | morphea                    | radiation                            | urogenital                                  |
| bacteriological           | diminished melanin<br>formation     | hydrocodone              | morphine                   | radiodermatitis                      | urticaria                                   |
| battering                 | diphtheria tetanus and<br>pertussis | hydrocodone bitartrate   | mortality                  | rainwater collection                 | vaccination                                 |
| BCG                       | disgnosis                           | hygiene                  | mosquito nets              | RBC                                  | vaccine                                     |
| beat                      | doctor                              | hyperactivity            | motorcyclist               | RBC transfusion                      | vasculitis                                  |
| beating                   | domestic violence                   | hypertensi               | MSR WaterWorks             | RBCs                                 | vehicle safety                              |
| beau's lines              | down syndrome                       | hypertrichosis           | mucha-habermann<br>disease | reactive perforating<br>collagenosis | vendor provided water                       |
| bed nets                  | down's syndrome                     | hypochlorite             | mucinosis of skin          | recidivism                           | verbal abuse                                |
| bednets                   | downs syndrome                      | hypochlorite solution    | musclestrain               | red blood cell transfusion           | verbal threat                               |

**Appendix Table 7. Keywords to identify projects on health in the Creditor Reporting System (continued)**

|                                       |                             |                                            |                                |                                    |                               |
|---------------------------------------|-----------------------------|--------------------------------------------|--------------------------------|------------------------------------|-------------------------------|
| beer                                  | DPT                         | hypochondriasis                            | musculoskeletal                | red blood cells                    | violence                      |
| beeturia                              | drepanocytosis              | ICDDR                                      | nail disorder                  | red cell in the urine              | violence against women        |
| behavioral                            | drink alcohol               | IMCI                                       | nail dystrophy                 | red cell in urine                  | violence and injuries         |
| behavioural                           | drinking                    | immune system                              | NCD                            | red cells in the urine             | violence by intimate partner  |
| belittle                              | drinking water              | immunization                               | NCDs                           | red cells in urine                 | violence sexuelle             |
| belittling                            | drug abuse                  | impaired absorption                        | neck injury                    | reduce alcohol                     | violent                       |
| berloque dermatitis                   | drug addiction              | impetigo                                   | neck pain                      | reduce drinking                    | virus infection of the throat |
| besnier's prurigo                     | drug photoallergic response | impetigo herpetiformis                     | neck strain                    | respiratory                        | vitamin                       |
| beta lactamase inhibitor combinations | drug phototoxic response    | improved drinking water                    | necrobiosis lipoidica          | restless                           | vitiligo                      |
| bipolar                               | drug regimens               | improved sanitation                        | neoplas                        | restorative sleep                  | vodka                         |
| blind                                 | drug seeking                | improved water                             | neurosis                       | restrict access                    | voeding                       |
| blindness                             | drug use                    | incestuous abuse                           | neurotic                       | rheumati                           | von zumbusch's disease        |
| blood survey                          | drugs                       | indoor residual spray                      | nitroimidazole antibiotics     | rhinophyma                         | WASH                          |
| blood Transfusion                     | duhring's disease           | infantile papular acrodermatitis           | non communicable               | rifampicin                         | washhand                      |
| boil                                  | dysentery                   | infection                                  | non-communicable diseases      | ritalin                            | waste water                   |
| borehole                              | dyshidrosis                 | infection of the lung                      | non-heme iron                  | road across the street             | wastewater                    |
| bottled water                         | dyslexia                    | infections of skin and subcutaneous tissue | noncommunicable                | road cooperative                   | water epidemic                |
| brandy                                | dysthymia                   | infectious                                 | nourish                        | road crash                         | water filter                  |
| bromhidrosis                          | early marriage              | infective dermatitis                       | nucleoside analogue antivirals | road injuries                      | water purification            |
| bronchial tubes                       | eating disorder             | infiltrative disorder                      | nurse                          | road management and safety project | water purifier                |
| bronchitis                            | ebola                       | influenza                                  | nutrition                      | road safety                        | water quality                 |
| bullous disorder                      | eccrine sweat disorder      | ingrowing nail                             | obesity                        | robles disease                     | water resource                |
| café au lait spots                    | echinococcosis              | inhalant                                   | occupational accident          | rosacea                            | water scarcity                |
| calcinosis cutis                      | economic abuse              | injure partner                             | occupational disease           | rotavirus                          | water security                |

**Appendix Table 7. Keywords to identify projects on health in the Creditor Reporting System (continued)**

|                                    |                                 |                                                      |                                      |                              |                           |
|------------------------------------|---------------------------------|------------------------------------------------------|--------------------------------------|------------------------------|---------------------------|
| calcium                            | economic control                | injuries at work                                     | occupational fatalities              | RTI                          | water withdrawal          |
| cancer                             | eczema                          | injury at work                                       | occupational fatality                | rum                          | water-related disease     |
| candidid                           | eczematid                       | inner endorphin                                      | occupational health                  | sacroiliac joint dysfunction | whiplash                  |
| cannabis                           | eGFR                            | insecticidal nets                                    | occupational illness                 | safe container               | whipworm                  |
| capitis totalis                    | elastosis perforans serpiginosa | insecticide treated nets                             | occupational injuries                | safe drinking                | whiskey                   |
| carbuncle                          | electroconvulsive therapy       | insomnia                                             | occupational injuries and fatalities | safe sanitation              | WHO                       |
| cardiovascular                     | elephantiasis                   | insulin                                              | occupational injury                  | safe system approach         | whooping cough            |
| caring roadway                     | emotional                       | insult                                               | occupational safety                  | safe water                   | wine                      |
| cart with small drum               | emotional abuse                 | integrated management of childhood illness           | onchocerciasis                       | safer road                   | women empowerment         |
| cart with small tank               | emotional violence              | international center for diarrhoeal disease research | onychogryphosis                      | safety at work               | workplace accident        |
| case detection                     | empower women                   | intimate partner violence                            | onycholysis                          | sanitation                   | workplace fatalities      |
| cataract                           | empowerment of women            | intimidate                                           | opioid                               | scar                         | workplace fatality        |
| CBC                                | endocrine                       | intimidating                                         | opium                                | scar conditions              | workplace health          |
| cellulitis                         | endorphin                       | intimidation                                         | OPV                                  | schistosomiasis              | workplace illness         |
| cephalosporin antibiotics          | eosinophilic cellulitis         | intravenous iron                                     | oral cholera                         | schizo-                      | workplace injuries        |
| cerebrovascular                    | epidemic                        | iodine crystal                                       | oral health                          | schizophrenia                | workplace injury          |
| cervical degenerative disc disease | epidermal cyst                  | iodine solution                                      | oral iron                            | sclerodactyly                | workplace safety          |
| cervical osteoarthritis            | erythema                        | iodine treatment                                     | oral polio vaccine                   | scotch                       | World Health Organisation |
| cervical spine                     | erythema elevatum diutinum      | IPV                                                  | oral rehydration salt                | sebaceous cyst               | XDR TB                    |
| chagas                             | erythema intertrigo             | iron administration                                  | oral rehydration solution            | seborrhoea capitis           | xerosis cutis             |
| chemical Purification              | erythematosus                   | iron deficiency                                      | oral rehydration therapy             | seborrhoeic keratosis        | yellow fever              |



**Appendix Table 7. Keywords to identify projects on health in the Creditor Reporting System (continued)**

|                                      |                                 |                                                               |                         |                       |                                   |
|--------------------------------------|---------------------------------|---------------------------------------------------------------|-------------------------|-----------------------|-----------------------------------|
| chemical toilet                      | erythematous                    | iron deficient                                                | ORS                     | self-esteem           | yellow nail syndrome              |
| chemotherapy                         | erythrasma                      | iron supplement                                               | ORT                     | self-harm             | youth gender and equality network |
| child in pornographic performance    | exercise core                   | iron therapy                                                  | OSH                     | senear-usher syndrome | zinc                              |
| child in prostitution                | facet joint osteoarthritis      | iron-deficiency                                               | osteoarthritis          | septic system         |                                   |
| child in sexual                      | factitial dermatitis            | iron-deficient                                                | osteomyelitis           | sex assault           |                                   |
| child incestuous abuse               | fatalities at work              | iron-rich protein                                             | over weight             | sexual abuse          |                                   |
| child marriage                       | fatality at work                | irritability                                                  | overweight              | sexual coercion       |                                   |
| child prostitute                     | fatigue                         | irs                                                           | oxycodone               | sexual exploitation   |                                   |
| child sex                            | febrile neutrophilic dermatosis | ischaemic                                                     | oxycodone HCL           | sexual grooming       |                                   |
| child sexual abuse                   | feeding                         | ischemic                                                      | pagophagia              | sexual violence       |                                   |
| child sexual assault                 | female genital mutilation       | isolate                                                       | paint thinner           | shigella              |                                   |
| child sexual exploitation            | female mental health            | isolating                                                     | palmaris et plantaris   | shortness of breath   |                                   |
| child sexual grooming                | fentanyl                        | isolation                                                     | pandemic                | shove                 |                                   |
| childhood emotional and sexual abuse | ferrous sulfate                 | isoniazid                                                     | papillomavirus vaccine  | sickle cell           |                                   |
| childhood incestuous abuse           | fever                           | isthmie spondylolisthesis                                     | papulosis               | skin appendage        |                                   |
| childhood sexual abuse               | FGM                             | IV iron                                                       | papulosquamous disorder | skin changes          |                                   |
| childhood sexual exploitation        | flush toilet                    | juvenile dermatitis herpetiformis                             | parapsoriasis           | skin disease          |                                   |
| childhood sexual grooming            | fogo selvagem                   | Katadyn                                                       | parasite                | skin eruption         |                                   |
| children in pornographic performance | follicular cysts                | kayayama fever                                                | parasite disease        | slap                  |                                   |
| children in prostitution             | follicular disorder             | keratoderma                                                   | parenteral iron         | slapping              |                                   |
| chloasma                             | folliculitis decalvans          | keratosis follicularis et parafollicularis in cutem penetrans | paronychia              | sleep disorder        |                                   |

**Appendix Table 7. Keywords to identify projects on health in the Creditor Reporting System (continued)****Note:**

1. We have translated all the keywords listed above to Spanish, French, Portuguese, Italian, Dutch, German, Norwegian, and Swedish
2. We performed keywords searching using 1) all lower case; 2) all upper case; 3) capitalize the first letter of each word 4) capitalize the first letter of the term
3. To prevent missing keywords containing unrecognizable characters (e.g. “f?ver”), we replaced each letter of the keywords in the table with “?”, “?” “/” or spacing.
4. Reference:
  - a. Global Burden of Disease Collaborative Network. Global Burden of Disease Study 2017 (GBD 2017) Results. [Internet]. Seattle, United States: Institute for Health Metrics and Evaluation (IHME). 2018 [cited 2018 Dec 19]. Available from: <http://ghdx.healthdata.org/gbd-results-tool>
  - b. Lu C, Chu A, Li Z, Shen J, Subramanian S, Hill K. Assessing development assistance for child survival between 2000 and 2014: A multi-sectoral perspective. Fan VY, editor. PLoS One. 2017 Jul 11;12(7):e0178887.
  - c. Li Z, Li M, Patton GC, Lu C. Global Development Assistance for Adolescent Health From 2003 to 2015. JAMA Netw Open. 2018 Aug 10;1(4):e181072.
  - d. Lu C, Li Z, Patel V. Global child and adolescent mental health: The orphan of development assistance for health. PLoS Med. 2018 Mar 9;15(3):e1002524.
  - e. Gilbert BJ, Patel V, Farmer PE, Lu C. Assessing Development Assistance for Mental Health in Developing Countries: 2007–2013. PLoS Med. 2015 Jun 2;12(6):e1001834.
  - f. World Health Organization. Communicable Diseases [Internet]. [cited 2019 Mar 28]. Available from: <https://www.afro.who.int/health-topics/communicable-diseases>
  - g. World Health Organization. 2013-2020 Global Action Plan for the Prevention and Control of Noncommunicable Diseases [Internet]. 2013 [cited 2018 Nov 12]. Available from: [http://apps.who.int/iris/bitstream/handle/10665/94384/9789241506236\\_eng.pdf?sequence=1](http://apps.who.int/iris/bitstream/handle/10665/94384/9789241506236_eng.pdf?sequence=1)
  - h. Zhang S, Incardona B, Qazi SA, Stenberg K, Campbell H, Nair H, et al. Cost-effectiveness analysis of revised WHO guidelines for management of childhood pneumonia in 74 Countdown countries. J Glob Health. 2017 Jun;7(1):010409.
  - i. Dieleman JL, Schneider MT, Haakenstad A, Singh L, Sadat N, Birger M, et al. Development assistance for health: past trends, associations, and the future of international financial flows for health. Lancet. 2016 Jun;387(10037):2536–44.
  - j. Dieleman JL, Graves CM, Templin T, Johnson E, Baral R, Leach-Kemon K, et al. Global Health Development Assistance Remained Steady In 2013 But Did Not Align With Recipients’ Disease Burden. Health Aff. 2014 May 2;33(5):878–86.
  - k. Ravishankar N, Gubbins P, Cooley RJ, Leach-Kemon K, Michaud CM, Jamison DT, et al. Financing of global health: tracking development assistance for health from 1990 to 2007. Lancet. 2009 Jun;373(9681):2113–24.
  - l. World Health Organization. Water, sanitation and hygiene to combat neglected tropical diseases [Internet]. [cited 2019 Mar 28]. Available from: <https://apps.who.int/iris/bitstream/handle/10665/255563/WHO-FWC-WSH-17.02-eng.pdf>
  - m. World Health Organization. Diet, nutrition and the prevention of chronic diseases [Internet]. WHO. World Health Organization; 2014 [cited 2019 Mar 28]. Available from: <https://www.who.int/dietphysicalactivity/publications/trs916/summary/en/>

**Appendix Table 7. Keywords to identify projects on health in the Creditor Reporting System (continued)**

- n. World Health Organization. World report on child injury prevention. WHO [Internet]. 2015 [cited 2017 Dec 25]; Available from: [http://www.who.int/violence\\_injury\\_prevention/child/injury/world\\_report/en/](http://www.who.int/violence_injury_prevention/child/injury/world_report/en/)
- o. ICD. 2018 ICD-10-CM Codes [Internet]. [cited 2018 Jan 11]. Available from: <http://www.icd10data.com/ICD10CM/Codes>
- p. Centers for Disease Control and Prevention. Guidelines for prevention and treatment opportunistic infections in HIV-infected adults and adolescents; recommendations from CDC, the National Institutes of Health, and the HIV Medicine Association/Infectious Diseases Society of America [Internet]. CDC Stacks Public Health Publications. 2009 [cited 2017 Nov 1]. Available from: <https://stacks.cdc.gov/view/cdc/5236>
- q. World Health Organization. Guidelines for prevention and treatment opportunistic infections in HIV-infected adults and adolescents; recommendations from CDC, the National Institutes of Health, and the HIV Medicine Association/Infectious Diseases Society of America [Internet]. 2012 [cited 2017 Nov 1]. Available from: <http://www.who.int/hiv/en/>
- r. World Health Organization. Psychosocial Support [Internet]. WHO. World Health Organization; 2006 [cited 2017 Nov 1]. Available from: <http://www.who.int/hiv/topics/psychosocial/support/en/>
- s. Bermejo F, García-López S. A guide to diagnosis of iron deficiency and iron deficiency anemia in digestive diseases. *World J Gastroenterol*. 2009 Oct 7;15(37):4638–43.
- t. Camaschella C. Iron-Deficiency Anemia. Longo DL, editor. *N Engl J Med*. 2015 May 7;372(19):1832–43.
- u. Hawton K, Saunders KE, O'Connor RC. Self-harm and suicide in adolescents. *Lancet*. 2012 Jun;379(9834):2373–82.
- v. GoodTherapy website. Therapy for Self Harm, Therapist for Self Harm Issues [Internet]. [cited 2018 Jan 12]. Available from: <https://www.goodtherapy.org/learn-about-therapy/issues/self-harm>
- w. World Health Organization. WHO | Assessment for self harm/suicide in persons with priority mental, neurological and substance use disorders. WHO [Internet]. 2016 [cited 2018 Jan 12]; Available from: [http://www.who.int/mental\\_health/mhgap/evidence/suicide/q1/en/](http://www.who.int/mental_health/mhgap/evidence/suicide/q1/en/)
- x. World Health Organization. WHO | Youth violence [Internet]. WHO. World Health Organization; 2016 [cited 2017 Aug 9]. Available from: [http://who.int/violence\\_injury\\_prevention/violence/youth/en/](http://who.int/violence_injury_prevention/violence/youth/en/)
- y. Krug EG, Mercy JA, Dahlberg LL, Zwi AB. The world report on violence and health. *Lancet*. 2002 Oct 5;360(9339):1083–8.
- z. Resnick MD, Bearman PS, Blum RW, Bauman KE, Harris KM, Jones J, et al. Protecting Adolescents From Harm. *JAMA*. 1997 Sep 10;278(10):823.
- aa. Kessler RC, Berglund P, Demler O, Jin R, Koretz D, Merikangas KR, et al. The Epidemiology of Major Depressive Disorder. *JAMA*. 2003 Jun 18;289(23):3095.
- bb. Cuijpers P, Beekman ATF, Reynolds CF, III. Preventing depression: a global priority. *JAMA*. 2012 Mar 14;307(10):1033–4.
- cc. Mayo Clinic. Depression (major depressive disorder) - Diagnosis and treatment - Mayo Clinic [Internet]. [cited 2018 Jan 12]. Available from: <https://www.mayoclinic.org/diseases-conditions/depression/diagnosis-treatment/drc-2035601>
- dd. MacGregor AJ, Andrew T, Sambrook PN, Spector TD. Structural, psychological, and genetic influences on low back and neck pain: A study of adult female twins. *Arthritis Care Res (Hoboken)*. 2004 Apr 15;51(2):160–7.
- ee. Strine TW, Hootman JM. US national prevalence and correlates of low back and neck pain among adults. *Arthritis Rheum*. 2007 May 15;57(4):656–65.
- ff. Mayo Clinic. Diarrhea - Diagnosis and treatment - Mayo Clinic [Internet]. [cited 2018 Jan 12]. Available from: <https://www.mayoclinic.org/diseases-conditions/diarrhea/diagnosis-treatment/drc-20352246>

**Appendix Table 7. Keywords to identify projects on health in the Creditor Reporting System (continued)**

- gg. World Health Organization. WHO | Water, sanitation and hygiene interventions and the prevention of diarrhoea. WHO [Internet]. 2015 [cited 2017 Dec 25]; Available from: [http://www.who.int/elena/titles/bbc/wsh\\_diarrhoea/en/](http://www.who.int/elena/titles/bbc/wsh_diarrhoea/en/)
- hh. Trunz BB, Fine P, Dye C. Effect of BCG vaccination on childhood tuberculous meningitis and miliary tuberculosis worldwide: a meta-analysis and assessment of cost-effectiveness. *Lancet*. 2006;367(9517):1173–80.
- ii. Colditz GA, Brewer TF, Berkey CS, Wilson ME, Burdick E, Fineberg H V., et al. Efficacy of BCG Vaccine in the Prevention of Tuberculosis. *JAMA*. 1994 Mar 2;271(9):698.
- jj. Lienhardt C, Vernon A, Raviglione MC. New drugs and new regimens for the treatment of tuberculosis: review of the drug development pipeline and implications for national programmes. *Curr Opin Pulm Med*. 2010 Mar;1.
- kk. Mayo Clinic. Tuberculosis - Diagnosis and treatment - Mayo Clinic [Internet]. [cited 2018 Jan 12]. Available from: <https://www.mayoclinic.org/diseases-conditions/tuberculosis/diagnosis-treatment/drc-20351256>
- ll. World Health Organization. TB Prevention, Diagnosis and Treatment. [cited 2018 Jan 12]; Available from: [http://www.who.int/tb/challenges/hiv/07\\_tb\\_prevention\\_diagnosis\\_and\\_treatment\\_eng.pdf](http://www.who.int/tb/challenges/hiv/07_tb_prevention_diagnosis_and_treatment_eng.pdf)
- mm. American Academy of Pediatrics Committee on Injury, Violence, and Poison Prevention, Violence and PP, Wentz KR, Gore EJ, Copass MK. Prevention of drowning. *Pediatrics*. 2010 Jul 1;126(1):178–85.

**Appendix Table 8. Methods used to allocate disease specific and integrated health funds to RMNCAH**

| Project funds                                                                                                                                                                                                          | Sub-section <sup>a</sup>          | Fraction                    | Data                                                                                                                                                                                                                                                                                        | Data source <sup>g</sup>                                                                                                   | Calculation |
|------------------------------------------------------------------------------------------------------------------------------------------------------------------------------------------------------------------------|-----------------------------------|-----------------------------|---------------------------------------------------------------------------------------------------------------------------------------------------------------------------------------------------------------------------------------------------------------------------------------------|----------------------------------------------------------------------------------------------------------------------------|-------------|
| General budget support <sup>b</sup>                                                                                                                                                                                    | Reproductive health (RH)          | Country value for each year | 1. Percentage of government spending allocated to health sector in all government spending (A)<br>2. Proportion of people of reproductive age (15-49 years old)/pregnant women and newborns/children one month to nine years old/adolescent population in total population (B)              | WHO GHE database(1)<br><br>Grollman C et al. (2017)(2), Arregoces L et al. (2015)(3), G8 Muskoka.(4), Li Z et al.(5)       | A*B         |
|                                                                                                                                                                                                                        | Maternal and newborn health (MNH) | Country value for each year |                                                                                                                                                                                                                                                                                             |                                                                                                                            |             |
|                                                                                                                                                                                                                        | Child health (CH)                 | Country value for each year |                                                                                                                                                                                                                                                                                             |                                                                                                                            |             |
|                                                                                                                                                                                                                        | Adolescent health (AH)            | Country value for each year |                                                                                                                                                                                                                                                                                             |                                                                                                                            |             |
| Health policy & administrative management; Medical education/training; Health personnel development; Medical research, Basic health infrastructure, Medical services, Basic health care, Health education <sup>b</sup> | RH                                | Country value for each year | Proportion of people of reproductive age (15-49 years old)/pregnant women and newborns/children one month to nine years old/adolescent population in total population (A)                                                                                                                   | Grollman C et al. (2017)(2), Arregoces L et al. (2015)(3), G8 Muskoka.(4), Li Z et al.(5) World Bank data(6). UNDP data(7) | A           |
|                                                                                                                                                                                                                        | MNH                               | Country value for each year |                                                                                                                                                                                                                                                                                             |                                                                                                                            |             |
|                                                                                                                                                                                                                        | CH                                | Country value for each year |                                                                                                                                                                                                                                                                                             |                                                                                                                            |             |
|                                                                                                                                                                                                                        | AH                                | Country value for each year |                                                                                                                                                                                                                                                                                             |                                                                                                                            |             |
| Basic nutrition <sup>c,d</sup>                                                                                                                                                                                         | RH                                |                             | 1. Incidence of protein-energy malnutrition and nutritional deficiency attributable to pregnant women/children one month to nine years old/adolescents aged 10-24 (A)<br>2. Percentage of pregnant women/children one month to nine years old/adolescent population in total population (B) | IHME GBDx(8), Black R et al.(9), Bhutta Z et al.(10)<br><br>World Bank data(6), UNDP data(7)                               | A*B         |
|                                                                                                                                                                                                                        | MNH                               | Country value for each year |                                                                                                                                                                                                                                                                                             |                                                                                                                            |             |
|                                                                                                                                                                                                                        | CH                                | Country value for each year |                                                                                                                                                                                                                                                                                             |                                                                                                                            |             |
|                                                                                                                                                                                                                        | AH                                | Country value for each year |                                                                                                                                                                                                                                                                                             |                                                                                                                            |             |

Appendix Table 8. Methods used to allocate disease specific and integrated health funds to RMNCAH (continued)

| Project funds                              | Sub-section <sup>a</sup> | Fraction                    | Data                                                                                                                                                                                                                                                                                                                                                                                                                                                                                           | Data source <sup>g</sup>                                                                                                                                            | Calculation |
|--------------------------------------------|--------------------------|-----------------------------|------------------------------------------------------------------------------------------------------------------------------------------------------------------------------------------------------------------------------------------------------------------------------------------------------------------------------------------------------------------------------------------------------------------------------------------------------------------------------------------------|---------------------------------------------------------------------------------------------------------------------------------------------------------------------|-------------|
| Malaria control <sup>e</sup>               | RH                       |                             | 1. Malaria incidence attributable to pregnant women and newborns/children one month to nine years old/adolescents aged 10-24 (A)<br>2. Percentage of donor malaria project funds targeting treatment interventions in all donor malaria project funds (B)<br>3. Percentage of pregnant women and newborns / children one month to nine years old/adolescents using ITNs (C)<br>4. Percentage of donor malaria projects funds targeting preventive activities in all donor malaria projects (D) | Powell-Jackson T et al.(11), IHME GBDx(8), Dellicour S et al. (2007)(12)<br>GFATM project documents(13)<br><br>WHO GHO data (14)<br><br>GFATM project documents(13) | A*B+C*D     |
|                                            | MNH                      | Country value for each year |                                                                                                                                                                                                                                                                                                                                                                                                                                                                                                |                                                                                                                                                                     |             |
|                                            | CH                       | Country value for each year |                                                                                                                                                                                                                                                                                                                                                                                                                                                                                                |                                                                                                                                                                     |             |
|                                            | AH                       | Country value for each year |                                                                                                                                                                                                                                                                                                                                                                                                                                                                                                |                                                                                                                                                                     |             |
| Tuberculosis control <sup>e</sup>          | RH                       |                             | 1. TB incidence attributable to pregnant women and newborns/children one month to nine years old/adolescents aged 10-24 (A)<br>2. Percentage of pregnant women and newborns/children one month to nine years old/adolescent population (B)                                                                                                                                                                                                                                                     | IHME GBDx(8), Sugarman J et al. (2014)(15),<br><br>World Bank data, UNDP data                                                                                       | A*B         |
|                                            | MNH                      | Country value for each year |                                                                                                                                                                                                                                                                                                                                                                                                                                                                                                |                                                                                                                                                                     |             |
|                                            | CH                       | Country value for each year |                                                                                                                                                                                                                                                                                                                                                                                                                                                                                                |                                                                                                                                                                     |             |
|                                            | AH                       | Country value for each year |                                                                                                                                                                                                                                                                                                                                                                                                                                                                                                |                                                                                                                                                                     |             |
| Infectious disease control <sup>e, f</sup> | RH                       |                             | 1. Incidence of diarrhea, lower respiratory, and other common infectious diseases attributable to pregnant women and newborns/children one month to nine years old/adolescents aged 10-24 (A)<br>2. Percentage of pregnant women and newborns/children one month to nine years old/adolescent population (B)                                                                                                                                                                                   | IHME GBDx<br><br>World Bank data(6), UNDP data(7)                                                                                                                   | A*B         |
|                                            | MNH                      | Country value for each year |                                                                                                                                                                                                                                                                                                                                                                                                                                                                                                |                                                                                                                                                                     |             |
|                                            | CH                       | Country value for each year |                                                                                                                                                                                                                                                                                                                                                                                                                                                                                                |                                                                                                                                                                     |             |
|                                            | AH                       | Country value for each year |                                                                                                                                                                                                                                                                                                                                                                                                                                                                                                |                                                                                                                                                                     |             |

**Appendix Table 8. Methods used to allocate disease specific and integrated health funds to RMNCAH (continued)**

| Project funds                                                                        | Sub-section <sup>a</sup> | Fraction                    | Data                                                                                                                                                                                                                                                                                                         | Data source <sup>g</sup>                          | Calculation |
|--------------------------------------------------------------------------------------|--------------------------|-----------------------------|--------------------------------------------------------------------------------------------------------------------------------------------------------------------------------------------------------------------------------------------------------------------------------------------------------------|---------------------------------------------------|-------------|
|                                                                                      | RH                       | Country value for each year | 1. Incidence of diarrhea, lower respiratory, and other common infectious diseases attributable to pregnant women and newborns/children one month to nine years old/adolescents aged 10-24 (A)<br>2. Percentage of pregnant women and newborns/children one month to nine years old/adolescent population (B) | IHME GBDx<br><br>World Bank data(6), UNDP data(7) |             |
|                                                                                      | MNH                      | Country value for each year |                                                                                                                                                                                                                                                                                                              |                                                   |             |
|                                                                                      | CH                       | Country value for each year |                                                                                                                                                                                                                                                                                                              |                                                   |             |
| Std control including hiv/aids                                                       | RH                       | 100%                        |                                                                                                                                                                                                                                                                                                              |                                                   |             |
|                                                                                      | MNH                      |                             |                                                                                                                                                                                                                                                                                                              |                                                   |             |
|                                                                                      | CH                       |                             |                                                                                                                                                                                                                                                                                                              |                                                   |             |
|                                                                                      | AH                       |                             |                                                                                                                                                                                                                                                                                                              |                                                   |             |
| Reproductive health care, Personnel development for population & reproductive health | RH                       | 100%                        |                                                                                                                                                                                                                                                                                                              |                                                   |             |
|                                                                                      | MNH                      |                             |                                                                                                                                                                                                                                                                                                              |                                                   |             |
|                                                                                      | CH                       |                             |                                                                                                                                                                                                                                                                                                              |                                                   |             |
|                                                                                      | AH                       |                             |                                                                                                                                                                                                                                                                                                              |                                                   |             |
| Family planning                                                                      | RH                       | 100%                        |                                                                                                                                                                                                                                                                                                              |                                                   |             |
|                                                                                      | MNH                      |                             |                                                                                                                                                                                                                                                                                                              |                                                   |             |
|                                                                                      | CH                       |                             |                                                                                                                                                                                                                                                                                                              |                                                   |             |
|                                                                                      | AH                       |                             |                                                                                                                                                                                                                                                                                                              |                                                   |             |

**Note:**

- Grollman C et al. (2017)'s estimation on reproductive health, maternal and newborn health, and child health is between 2003-2013. We use the values of year 2013 for year 2014-2016. Li Z et al.(2018)'s estimation on adolescent health is between 2003-2015. We use the values of year 2015 for year 2016. Dieleman J et al. (2016)'s estimation on development health assistance is between 1990-2015. We use the values of year 2015 for year 2016 and 2017.
- We calculated the population of pregnant women and newborns using the total population of reproductive age (15-49 years old) multiplied by birth rate. We assume the population of pregnant women is the same as the population of newborns.
- The incidence of protein-energy malnutrition and nutritional deficiency attributable to pregnant women at country is not available. Therefore, we adopt the incidence of thinness (BMI<18.5kg/m2) at the regional level (Africa, Asia, Oceania, Americas and Caribbean, and Europe) instead.
- The percentage of malaria incidence for newborns, children one month to nine years old, and adolescents are at country level; The percentage of malaria incidence for pregnant women is at WHO region level; We assume adolescents do not using ITNs.
- We assume the incidence of diarrhea, lower respiratory, and other common infectious diseases attributable among pregnant women is that of the average level among women aged 15-49 years old.

**Appendix Table 8. Methods used to allocate disease specific and integrated health funds to RMNCAH (continued)**

## f. Reference for Appendix Table 8:

1. World Health Organization. Global Health Expenditure Database [Internet]. [cited 2017 Dec 22]. Available from: <http://apps.who.int/nha/database/ViewData/Indicators/en>
2. Grollman C, Arregoces L, Martínez-Álvarez M, Pitt C, Mills A, Borghi J. 11 years of tracking aid to reproductive, maternal, newborn, and child health: estimates and analysis for 2003–13 from the Countdown to 2015. *Lancet Glob Heal*. 2017 Jan;5(1):e104–14.
3. Arregoces L, Daly F, Pitt C, Hsu J, Martínez-Álvarez M, Greco G, et al. Countdown to 2015: changes in official development assistance to reproductive, maternal, newborn, and child health, and assessment of progress between 2003 and 2012. *Lancet Glob Heal*. 2015 Jul;3(7):e410–21.
4. Dieleman JL, Schneider MT, Haakenstad A, Singh L, Sadat N, Birger M, et al. Development assistance for health: past trends, associations, and the future of international financial flows for health. *Lancet*. 2016 Jun;387(10037):2536–44.
5. Li Z, Li M, Patton GC, Lu C. Global Development Assistance for Adolescent Health From 2003 to 2015. *JAMA Netw Open*. 2018 Aug 10;1(4):e181072.
6. The World Bank. Fertility rate, total (births per woman) | Data [Internet]. [cited 2018 Jun 11]. Available from: <https://data.worldbank.org/indicator/SP.DYN.TFRT.IN?>
7. UNDP. World Population Prospects - Population Division - United Nations [Internet]. [cited 2017 Aug 2]. Available from: <https://esa.un.org/unpd/wpp/Download/Standard/Population/>
8. Global Burden of Disease Collaborative Network. Global Burden of Disease Study 2017 (GBD 2017) Results. [Internet]. Seattle, United States: Institute for Health Metrics and Evaluation (IHME). 2018 [cited 2018 Dec 19]. Available from: <http://ghdx.healthdata.org/gbd-results-tool>
9. Black RE, Victora CG, Walker SP, Bhutta ZA, Christian P, de Onis M, et al. Maternal and child undernutrition and overweight in low-income and middle-income countries. *Lancet*. 2013 Aug 3;382(9890):427–51.
10. Bhutta ZA, Das JK, Rizvi A, Gaffey MF, Walker N, Horton S, et al. Evidence-based interventions for improvement of maternal and child nutrition: what can be done and at what cost? *Lancet*. 2013 Aug 3;382(9890):452–77.
11. Powell-Jackson T, Borghi J, Mueller DH, Patouillard E, Mills A. Countdown to 2015: tracking donor assistance to maternal, newborn, and child health. *Lancet*. 2006 Sep;368(9541):1077–87.
12. Dellicour S, Tatem AJ, Guerra CA, Snow RW, ter Kuile FO. Quantifying the Number of Pregnancies at Risk of Malaria in 2007: A Demographic Study. *Fisk NM*, editor. *PLoS Med*. 2010 Jan 26;7(1):e1000221.
13. The Global Fund. Grants in Detail [Internet]. [cited 2018 Jun 11]. Available from: <https://www.theglobalfund.org/en/downloads/>
14. World Health Organization. GHO | By category | Health Equity Monitor. WHO [Internet]. [cited 2017 Feb 23]; Available from: <http://apps.who.int/gho/data/node.main.nHE-1540?lang=en>
15. Sugarman J, Colvin C, Moran AC, Oxlade O. Tuberculosis in pregnancy: an estimate of the global burden of disease. *Lancet Glob Heal*. 2014 Dec 1;2(12):e710–6.



**Appendix Table 9. Definition disability-adjusted life years (DALYs) on reproductive health (RH), maternal and newborn health (MNH), child health (CH), and adolescent health (AH)**

| Health component | Definition                                                                                                                                                                                                                                                                                                                                                                                                                                                                                                                                                                                                                                                                                                                                                                                                                                                                                                                                                                                                                                                                                                                                                                                                                                                                                                                                                                                                                                                                                                                                                                                                                                                                                                                     |
|------------------|--------------------------------------------------------------------------------------------------------------------------------------------------------------------------------------------------------------------------------------------------------------------------------------------------------------------------------------------------------------------------------------------------------------------------------------------------------------------------------------------------------------------------------------------------------------------------------------------------------------------------------------------------------------------------------------------------------------------------------------------------------------------------------------------------------------------------------------------------------------------------------------------------------------------------------------------------------------------------------------------------------------------------------------------------------------------------------------------------------------------------------------------------------------------------------------------------------------------------------------------------------------------------------------------------------------------------------------------------------------------------------------------------------------------------------------------------------------------------------------------------------------------------------------------------------------------------------------------------------------------------------------------------------------------------------------------------------------------------------|
| RH               | DALYs caused by HIV/AIDS, other sexually transmitted diseases (syphilis, chlamydial infection, gonococcal infection, trichomoniasis, genital herpes, and other sexually transmitted diseases), maternal abortion, and sexual violence. The target group is people aged 15-49 years old                                                                                                                                                                                                                                                                                                                                                                                                                                                                                                                                                                                                                                                                                                                                                                                                                                                                                                                                                                                                                                                                                                                                                                                                                                                                                                                                                                                                                                         |
| MNH              | DALYs caused by maternal disorders (maternal hemorrhage, maternal sepsis and other maternal infections, maternal hypertensive disorders, maternal obstructed labor and uterine rupture, maternal miscarriage and ectopic pregnancy, indirect maternal deaths, late maternal deaths, other maternal disorders), and neonatal disorders (neonatal preterm birth, neonatal encephalopathy due to birth asphyxia and trauma, neonatal sepsis and other neonatal infections, hemolytic disease and other neonatal jaundice).                                                                                                                                                                                                                                                                                                                                                                                                                                                                                                                                                                                                                                                                                                                                                                                                                                                                                                                                                                                                                                                                                                                                                                                                        |
| CH               | DALYs caused by communicable disease control (HIV/AIDS, TB, African trypanosomiasis, Schistosomiasis, Cysticercosis, Cystic echinococcosis, Lymphatic filariasis, Onchocerciasis, Trachoma, Dengue, Yellow fever, Rabies, Intestinal nematode infections, Food-borne trematodiasis, other neglected tropical diseases, Encephalitis, Diphtheria, Whooping cough, Tetanus, Measles, Varicella and Herpes zoster, Malaria, Chagas disease, Leishmaniasis, Ebola, Acute hepatitis, Leprosy, Zika virus, Guinea worm disease, Intestinal infectious diseases, Meningitis), non-communicable diseases (Cardiomyopathy and Myocarditis, Chronic respiratory diseases, Cardiovascular diseases, Stroke, Musculoskeletal disorders, Neurological disorders, Cirrhosis and other chronic liver diseases, Digestive diseases, Neoplasms, Diabetes/urogenital/blood/endocrine diseases, other non-communicable diseases), WASH diseases (diarrhea), nutrition (protein-energy malnutrition, iodine deficiency, vitamin A deficiency, dietary iron deficiency, and other nutritional deficiencies), mental health (Attention-deficit/hyperactivity disorder, Conduct disorder, Idiopathic developmental intellectual disability, Schizophrenia, Alcohol use disorders, Drug use disorders, Depressive disorders, Bipolar disorder, Anxiety disorders, Eating disorders, Autistic spectrum disorders, and other mental and substance use disorders), and injury and physical rehabilitation (Transport injuries, Unintentional injuries, Self-harm and interpersonal violence, and forces of nature, conflict and terrorism, and executions and police conflict). The target group is children aged one month to nine years old.            |
| AH               | DALYs caused by communicable disease control excluding HIV and sexually transmitted diseases (Tuberculosis, African trypanosomiasis, Schistosomiasis, Cysticercosis, Cystic echinococcosis, Lymphatic filariasis, Onchocerciasis, Trachoma, Dengue, Yellow fever, Rabies, Intestinal nematode infections, Food-borne trematodiasis, other neglected tropical diseases, Encephalitis, Diphtheria, Whooping cough, Tetanus, Measles, Varicella and herpes zoster, Malaria, Chagas disease, Leishmaniasis, Ebola, Acute hepatitis, Leprosy, Zika virus, Guinea worm disease, Intestinal infectious diseases, Meningitis), non-communicable diseases (Cardiomyopathy and myocarditis, Chronic respiratory diseases, Cardiovascular diseases, Stroke, Musculoskeletal disorders, Neurological disorders, Cirrhosis and other chronic liver diseases, Digestive diseases, Neoplasms, Diabetes/urogenital/blood/endocrine diseases, other non-communicable diseases), WASH diseases (diarrhea), nutrition (protein-energy malnutrition, iodine deficiency, vitamin A deficiency, dietary iron deficiency, and other nutritional deficiencies), mental health (Attention-deficit/hyperactivity disorder, Conduct disorder, Idiopathic developmental intellectual disability, Schizophrenia, Alcohol use disorders, Drug use disorders, Depressive disorders, Bipolar disorder, Anxiety disorders, Eating disorders, Autistic spectrum disorders, and other mental and substance use disorders), and injury (transport injuries, unintentional injuries, self-harm and interpersonal violence, and forces of nature, conflict and terrorism, and executions and police conflict). The target group is adolescents aged 10-24 years old. |

**Appendix Table 10. Definition of six causes of disability-adjusted life years (DALYs)**

| <b>Cause</b>                                                        | <b>Definition</b>                                                                                                                                                                                                                                                                                                                                                                                                                                                                                                                                                               |
|---------------------------------------------------------------------|---------------------------------------------------------------------------------------------------------------------------------------------------------------------------------------------------------------------------------------------------------------------------------------------------------------------------------------------------------------------------------------------------------------------------------------------------------------------------------------------------------------------------------------------------------------------------------|
| Communicable diseases, excluding WASH diseases                      | DALYs caused by HIV/AIDS and other sexually transmitted diseases, TB, African trypanosomiasis, Schistosomiasis, Cysticercosis, Cystic echinococcosis, Lymphatic filariasis, Onchocerciasis, Trachoma, Dengue, Yellow fever, Rabies, Intestinal nematode infections, Food-borne trematodiasis, other neglected tropical diseases, Encephalitis, Diphtheria, Whooping cough, Tetanus, Measles, Varicella and Herpes zoster, Malaria, Chagas disease, Leishmaniasis, Ebola, Acute hepatitis, Leprosy, Zika virus, Guinea worm disease, Intestinal infectious diseases, Meningitis. |
| Injuries                                                            | DALYs caused by transport injuries, unintentional injuries, self-harm and interpersonal violence, and forces of nature, conflict and terrorism, and executions and police conflict.                                                                                                                                                                                                                                                                                                                                                                                             |
| Mental disorders                                                    | DALYs caused by Attention-deficit/Hyperactivity disorder, Conduct disorder, Idiopathic developmental intellectual disability, Schizophrenia, Alcohol use disorders, Drug use disorders, Depressive disorders, Bipolar disorder, Anxiety disorders, Eating disorders, Autistic spectrum disorders, and other mental and substance use disorders.                                                                                                                                                                                                                                 |
| Non-communicable diseases, excluding nutrition, and mental diseases | DALYs caused by Cardiomyopathy and Myocarditis, Chronic respiratory diseases, Cardiovascular diseases, Stroke, Musculoskeletal disorders, Neurological disorders, Cirrhosis and other chronic liver diseases, Digestive diseases, Neoplasms, Diabetes/Urogenital/Blood/Endocrine diseases, other non-communicable diseases.                                                                                                                                                                                                                                                     |
| Nutritional-deficiency diseases                                     | DALYs caused by Protein-energy malnutrition, Iodine deficiency, Vitamin A deficiency, Dietary iron deficiency, and other nutritional deficiencies.                                                                                                                                                                                                                                                                                                                                                                                                                              |
| WASH diseases                                                       | DALYs caused by Diarrhea                                                                                                                                                                                                                                                                                                                                                                                                                                                                                                                                                        |

**Note:**

1. Reference: Global Burden of Disease Collaborative Network. Global Burden of Disease Study 2017 (GBD 2017) Results. [Internet]. Seattle, United States: Institute for Health Metrics and Evaluation (IHME). 2018 [cited 2018 Dec 19]. Available from: <http://ghdx.healthdata.org/gbd-results-tool>

**Appendix Table 11. Keywords to identify projects on WASH diseases in the Creditor Reporting System**

|                       |                       |                           |                                    |                       |                       |
|-----------------------|-----------------------|---------------------------|------------------------------------|-----------------------|-----------------------|
| access to water       | crystal               | improved drinking water   | Over-the-counter                   | RV                    | unsafe drinking water |
| anti-diarrheal        | dehydration           | improved water            | piped sewer system                 | safe container        | unsafe water          |
| antidiarrheal         | depth Filter          | iodine crystal            | piped water                        | safe drinking water   | vendor provided water |
| bacteriological       | diarrhea              | iodine solution           | pit latrine                        | safe water            | WASH                  |
| boil                  | diarrhoea             | iodine treatment          | poor hygiene                       | septic system         | wash hand             |
| borehole              | drink liquid          | Katadyn                   | potable aqua                       | soap                  | washhand              |
| bottled water         | drinking liquid       | lack of water             | protected dug wells                | sodium hypochlorite   | washing hand          |
| cart with small drum  | drinking water        | latrine                   | protected spring                   | standpipe             | waste water           |
| cart with small tank  | hand wash             | loperamide                | public tap                         | surface water         | wastewater            |
| chemical Purification | hand washing          | membrane filter           | PUR Scout                          | tablet                | water disinfection    |
| chlorinated water     | handwash              | MSR WaterWorks            | PUR-Hiker                          | tanker-truck          | water epidemic        |
| chlorine drop         | handwashing           | norovirus                 | rainwater collection               | toxic Water           | water filter          |
| chlorine treatment    | hygiene               | open-defecation-free      | rehydration drink                  | tubewell              | water purification    |
| clean water           | hypochlorite          | oral rehydration solution | rotavirus                          | ultraviolet           | water purifier        |
| composting toilet     | hypochlorite solution | ORS                       | rotavirus and pneumococcal vaccine | unclean water         | water quality         |
| contaminated water    | Imodium               | OTC                       | rotavirus vaccine                  | unimproved sanitation | water storage         |

**Note:**

1. We have translated all the keywords listed above to Spanish, French, Portuguese, Italian, Dutch, German, Norwegian, and Swedish
2. We performed keywords searching using 1) all lower case; 2) all upper case; 3) capitalize the first letter of each word 4) capitalize the first letter of the term
3. To prevent missing keywords containing unrecognizable characters (e.g. “f?ver”), we replaced each letter of the keywords in the table with “?”, “??” “/” or spacing.
4. Reference:
  - a. Global Burden of Disease Collaborative Network. Global Burden of Disease Study 2017 (GBD 2017) Results. [Internet]. Seattle, United States: Institute for Health Metrics and Evaluation (IHME). 2018 [cited 2018 Dec 19]. Available from: <http://ghdx.healthdata.org/gbd-results-tool>
  - b. Lu C, Chu A, Li Z, Shen J, Subramanian S, Hill K. Assessing development assistance for child survival between 2000 and 2014: A multi-sectoral perspective. Fan VY, editor. PLoS One. 2017 Jul 11;12(7):e0178887.
  - c. Li Z, Li M, Patton GC, Lu C. Global Development Assistance for Adolescent Health From 2003 to 2015. JAMA Netw Open. 2018 Aug 10;1(4):e181072.
  - d. World Health Organization. Water, sanitation and hygiene to combat neglected tropical diseases [Internet]. [cited 2019 Mar 28]. Available from: <https://apps.who.int/iris/bitstream/handle/10665/255563/WHO-FWC-WSH-17.02-eng.pdf>
  - e. ICD. 2018 ICD-10-CM Codes [Internet]. [cited 2018 Jan 11]. Available from: <http://www.icd10data.com/ICD10CM/Codes>
  - f. World Health Organization. WHO | Water, sanitation and hygiene interventions and the prevention of diarrhoea. WHO [Internet]. 2015 [cited 2017 Dec 25]; Available from: [http://www.who.int/elena/titles/bbc/wsh\\_diarrhoea/en/](http://www.who.int/elena/titles/bbc/wsh_diarrhoea/en/)
  - g. Mayo Clinic. Diarrhea - Diagnosis and treatment - Mayo Clinic [Internet]. [cited 2018 Jan 12]. Available from: <https://www.mayoclinic.org/diseases-conditions/diarrhea/diagnosis-treatment/drc-20352246>

**Appendix Table 12. Keywords to identify projects on communicable diseases, excluding WASH diseases in the Creditor Reporting System**

|                                                |                               |                               |                            |                               |                         |
|------------------------------------------------|-------------------------------|-------------------------------|----------------------------|-------------------------------|-------------------------|
| amikacin                                       | CRE/CRPA                      | Gonorrhea                     | Legionnaires               | Plague                        | STEC                    |
| Acute Flaccid Myelitis                         | Creutzfeldt Jacob             | GPEI                          | Leprosy                    | plasmodium falciparum         | Streptococcal           |
| AFM                                            | Creutzfeldt-Jacob             | Granuloma                     | Leptospirosis              | plasmodium vivax              | Syphilis                |
| Anaplasmosis                                   | Creutzfeldt/Jacob             | Hansens                       | Lice                       | Pneumococcal                  | TB                      |
| anopheles                                      | Crypto                        | Hantavirus Pulmonary Syndrome | linezolid                  | pneumonia                     | TB-DOTS                 |
| Anthrax                                        | Cryptosporidiosis             | Head and Body Lice            | Listeria                   | polio                         | TBC                     |
| anti lepre-tbc                                 | Cyclosporiasis                | Hemolytic Uremic Syndrome     | Listeriosis                | Poliomyelitis                 | Td                      |
| anti-lepre et tbc                              | Dengue                        | Hep A                         | llin                       | Powassan                      | Tetanus                 |
| anti-TB                                        | Diphtheria                    | Hep B                         | LTBI                       | primaquine                    | trachoma                |
| Arboviral                                      | directly observed treatment   | Hep C                         | LVG                        | Psittacosis                   | transmissible           |
| artemisinin                                    | DOTS                          | Hep D                         | Lyme                       | Pthiriasis                    | Trichinosis             |
| ARV treatment through DOTS and MTCT prevention | DR-TB                         | Hep E                         | Lymphogranuloma venereum   | Pustular Rash                 | Trichonosis             |
| Babesiosis                                     | drug resistant TB             | Hepatitis A                   | malaria                    | pyrazinamide                  | trichuriasis            |
| bacillus calmette-guerin                       | drug resistant tuberculosis   | Hepatitis B                   | Marburg                    | Q-Fever                       | tropical disease        |
| BCG                                            | drug-resistant tuberculosis   | Hepatitis C                   | MDR TB                     | Rabbit fever                  | tubercullosis           |
| bed nets                                       | drug-resistant TB             | Hepatitis D                   | Measle                     | rabies                        | tuberculose             |
| bedaquiline                                    | drug-susceptible TB           | Hepatitis E                   | Measles                    | respiratory infection         | tuberculosis            |
| bednets                                        | drug-susceptible tuberculosis | Herpes                        | Melioidosis                | Rickettsiosis                 | Tularemia               |
| Botulism                                       | Dtap                          | Hib                           | Meningitis                 | rifadin                       | Typhoid Fever           |
| Brucellosis                                    | E. coli infection             | Histoplasmosis                | Meningococcal              | rifampicin                    | Typhus                  |
| Burkholderia mallei                            | Eastern Equine Encephalitis   | HPS                           | MMR                        | rifampin                      | Vaginosis               |
| Burkholderia pseudomallei                      | Ebola                         | HUS                           | monkeypox                  | rimactane                     | Valley fever            |
| Campylobacter                                  | EEE                           | indoor residual spray         | mump                       | river blindness               | Varicella               |
| Campylobacteriosis                             | Ehrlichiosis                  | infectious                    | mumps                      | Rubella                       | varicella vaccines      |
| capreomycin                                    | elephantiasis                 | infectious disease            | myambutol                  | Salmonella                    | Vibrio                  |
| Carbapenem-resistant Infection                 | Encephalitis                  | Influenza                     | neglected tropical disease | Salmonellosis gastroenteritis | Vibriosis               |
| Chancroid                                      | Epsilon Toxin                 | influenzae                    | Non-Polio                  | SARS                          | Viral Hemorrhagic Fever |
| Chickenpox                                     | EPTB                          | inguinale                     | Non-Polio Enterovirus      | Scabies Infestation           | whipworm                |
| Chikungunya                                    | ethambutol                    | INH                           | Norovirus                  | schistosomiasis               | Whooping Cough          |

**Appendix Table 12. Keywords to identify projects on communicable diseases, excluding WASH diseases in the Creditor Reporting System (continued)**

|                                 |                                     |                              |                             |                                   |                 |
|---------------------------------|-------------------------------------|------------------------------|-----------------------------|-----------------------------------|-----------------|
| Chlamydia                       | flu                                 | insecticidal nets            | NTD                         | Scombroid                         | XDR TB          |
| Cholera                         | fluoroquinolones                    | insecticide treated nets     | Otitis media                | Severe Acute Respiratory Syndrome | Yeast Infection |
| cholerae                        | Giardia                             | IPT                          | pandemic                    | Shiga toxin-producing             | Yellow Fever    |
| Ciguatera                       | Giardiasis                          | irs                          | Papillomarivirus            | Shigella                          | Yersenia        |
| Clostridium Difficile Infection | GID                                 | isoniazid                    | parainfectious              | Shigellosis gastroenteritis       | Yersinia        |
| Clostridium Perfringen          | GIDRTP                              | isoniazid prevention therapy | parasite infectious disease | Small pox                         | Zika            |
| Coccidioidomycosis fungal       | Glanders                            | itn                          | pathogenic microorganism    | smitn                             |                 |
| communicable disease            | Global Infectious Disease           | kanamycin                    | Pediculosis                 | soil-transmitted helminths        |                 |
| cowpox                          | Global Polio Eradication Initiative | Lassa                        | Pelvic Inflammatory         | Staphylococcal                    |                 |
| CRE-CRPA                        | Gonococcal                          | Legionellosis                | Pertussis                   | Staphylococcal                    |                 |

**Note:**

1. We have translated all the keywords listed above to Spanish, French, Portuguese, Italian, Dutch, German, Norwegian, and Swedish
2. We performed keywords searching using 1) all lower case; 2) all upper case; 3) capitalize the first letter of each word 4) capitalize the first letter of the term
3. To prevent missing keywords containing unrecognizable characters (e.g. “f?ver”), we replaced each letter of the keywords in the table with “?”, “??” “/” or spacing.
4. Reference:
  - a. Global Burden of Disease Collaborative Network. Global Burden of Disease Study 2017 (GBD 2017) Results. [Internet]. Seattle, United States: Institute for Health Metrics and Evaluation (IHME). 2018 [cited 2018 Dec 19]. Available from: <http://ghdx.healthdata.org/gbd-results-tool>
  - b. Lu C, Chu A, Li Z, Shen J, Subramanian S, Hill K. Assessing development assistance for child survival between 2000 and 2014: A multi-sectoral perspective. Fan VY, editor. PLoS One. 2017 Jul 11;12(7):e0178887.
  - c. Li Z, Li M, Patton GC, Lu C. Global Development Assistance for Adolescent Health From 2003 to 2015. JAMA Netw Open. 2018 Aug 10;1(4):e181072.
  - d. ICD. 2018 ICD-10-CM Codes [Internet]. [cited 2018 Jan 11]. Available from: <http://www.icd10data.com/ICD10CM/Codes>
  - e. World Health Organization. Communicable Diseases [Internet]. [cited 2019 Mar 28]. Available from: <https://www.afro.who.int/health-topics/communicable-diseases>
  - f. Zhang S, Incardona B, Qazi SA, Stenberg K, Campbell H, Nair H, et al. Cost-effectiveness analysis of revised WHO guidelines for management of childhood pneumonia in 74 Countdown countries. J Glob Health. 2017 Jun;7(1):010409.
  - g. Dieleman JL, Schneider MT, Haakenstad A, Singh L, Sadat N, Birger M, et al. Development assistance for health: past trends, associations, and the future of international financial flows for health. Lancet. 2016 Jun;387(10037):2536–44.
  - h. Dieleman JL, Graves CM, Templin T, Johnson E, Baral R, Leach-Kemon K, et al. Global Health Development Assistance Remained Steady In 2013 But Did Not Align With Recipients’ Disease Burden. Health Aff. 2014 May 2;33(5):878–86.
  - i. Ravishankar N, Gubbins P, Cooley RJ, Leach-Kemon K, Michaud CM, Jamison DT, et al. Financing of global health: tracking development assistance for health from 1990 to 2007. Lancet. 2009 Jun;373(9681):2113–24.

**Appendix Table 13. Keywords to identify projects on mental disorders in the Creditor Reporting System**

|                              |                                |                            |                                 |                                        |                                   |
|------------------------------|--------------------------------|----------------------------|---------------------------------|----------------------------------------|-----------------------------------|
| Addiction                    | Delirium                       | gender project             | MDD                             | Psycho-                                | situational' depression           |
| Affective                    | Delusion                       | girls empowerment          | Mental                          | psychologist                           | slapping                          |
| Alcohol                      | Dementia                       | girls initiative programme | mental health professional      | psychology                             | Sleep disorder                    |
| amitriptyline                | Dependency                     | Hallucination              | mirtazapine                     | psychosis                              | SNRI                              |
| Amphetamine                  | Depress                        | hitting                    | mood                            | psychotherapy                          | Somatoform                        |
| antidepressant               | Depression                     | homicide                   | nardil                          | psychotic depression                   | SSRI                              |
| antipsychotic                | depressive disorder            | hurt herself               | nefazodone                      | PTSD                                   | stalking                          |
| Anxiety                      | desipramine                    | hurt himself               | Neurosis                        | remeron                                | Substance abuse                   |
| Anxiolytic                   | Developmental disorder         | hurt himself/herself       | Neurotic                        | SAD                                    | surmontil                         |
| anxious distress             | dialectical behavioral therapy | hurt themselves            | norpramin                       | sadness                                | threat                            |
| aplenzin                     | domestic violence              | hurt yourself              | nortriptyline                   | Schizo-                                | TMS                               |
| Asperger                     | doxepin                        | hurt yourselves            | Opioid                          | seasonal affective disorder            | tofranil                          |
| assault                      | Drug abuse                     | hurting herself            | pamelor                         | selective serotonin reuptake inhibitor | transcranial magnetic stimulation |
| atypical depression          | Drug use                       | hurting himself            | parnate                         | selegiline                             | tranylcypromine                   |
| Autism                       | DSM-5                          | hurting himself/herself    | paroxetine                      | self burn                              | Trauma                            |
| battering                    | Dyslexia                       | hurting themselves         | paxil                           | self harm                              | trazodone                         |
| beating                      | dysphoric disorder             | hurting yourself           | peripartum depression           | self hurt                              | trimipramine                      |
| Behavioral                   | dysthymia                      | hurting yourselves         | Personality disorder            | self injuring                          | trintellix                        |
| Behavioural therapy          | Eating disorder                | Hyperactivity              | pexeva                          | self injurious                         | UN programme on adolescent girls  |
| bipolar                      | economic abuse                 | Hypochondriasis            | pharmacotherapy                 | self injury                            | viibryd                           |
| bupropion                    | economic control               | imipramine                 | phenelzine                      | self-burn                              | vilazodone                        |
| Cannabis                     | ECT                            | Insomnia                   | Phobia                          | self-esteem                            | violence                          |
| catatonia                    | electroconvulsive therapy      | intentional injury         | physical abuse                  | Self-harm                              | violence and injuries             |
| CBT                          | emotion                        | intentional-injury         | PMDD                            | self-hurt                              | violence sexuelle                 |
| celexa                       | Emotional                      | intimidating               | Post traumatic                  | self-injurers                          | violent                           |
| citalopram                   | emotional abuse                | IPV                        | postpartum depression           | self-injuring                          | vivactil                          |
| Cocaine                      | emsam                          | isocarboxazid              | Posttraumatic                   | self-injurious                         | vortioxetine                      |
| coercion                     | escitalopram                   | isolation                  | premenstrual dysphoric disorder | self-injury                            | wellbutrin SR                     |
| cognitive behavioral therapy | Family therapy                 | kicking                    | protriptyline                   | self-mutilation                        | wellbutrin XL                     |

**Appendix Table 13. Keywords to identify projects on mental disorders in the Creditor Reporting System (continued)**

|                      |                       |                    |                        |                                             |                                   |
|----------------------|-----------------------|--------------------|------------------------|---------------------------------------------|-----------------------------------|
| Cognitive impairment | fluoxetine            | lexapro            | prozac                 | serotonin-norepinephrine reuptake inhibitor | youth gender and equality network |
| Conduct disorder     | forfivo XL            | male privilege     | psychiatric            | sertraline                                  | zoloft                            |
| cutting              | frighten              | Mania              | psychiatrist           | sexual abuse                                |                                   |
| cyclothymic disorder | gender based violence | MAOIs              | Psychia-               | sexual violence                             |                                   |
| DBT                  | gender empowerment    | marginalized girls | psychiatric evaluation | SH                                          |                                   |
| decreased interest   | gender equality       | marplan            | psychiatrist           | situational depression                      |                                   |

**Note:**

1. We have translated all the keywords listed above to Spanish, French, Portuguese, Italian, Dutch, German, Norwegian, and Swedish
2. We performed keywords searching using 1) all lower case; 2) all upper case; 3) capitalize the first letter of each word 4) capitalize the first letter of the term
3. To prevent missing keywords containing unrecognizable characters (e.g. “f?ver”), we replaced each letter of the keywords in the table with “?”, “??” “/” or spacing.
4. Reference:
  - a. Global Burden of Disease Collaborative Network. Global Burden of Disease Study 2017 (GBD 2017) Results. [Internet]. Seattle, United States: Institute for Health Metrics and Evaluation (IHME). 2018 [cited 2018 Dec 19]. Available from: <http://ghdx.healthdata.org/gbd-results-tool>
  - b. Lu C, Chu A, Li Z, Shen J, Subramanian S, Hill K. Assessing development assistance for child survival between 2000 and 2014: A multi-sectoral perspective. Fan VY, editor. PLoS One. 2017 Jul 11;12(7):e0178887.
  - c. Li Z, Li M, Patton GC, Lu C. Global Development Assistance for Adolescent Health From 2003 to 2015. JAMA Netw Open. 2018 Aug 10;1(4):e181072.
  - d. Lu C, Li Z, Patel V. Global child and adolescent mental health: The orphan of development assistance for health. PLOS Med. 2018 Mar 9;15(3):e1002524.
  - e. Gilbert BJ, Patel V, Farmer PE, Lu C. Assessing Development Assistance for Mental Health in Developing Countries: 2007–2013. PLOS Med. 2015 Jun 2;12(6):e1001834.
  - f. ICD. 2018 ICD-10-CM Codes [Internet]. [cited 2018 Jan 11]. Available from: <http://www.icd10data.com/ICD10CM/Codes>
  - g. Dieleman JL, Schneider MT, Haakenstad A, Singh L, Sadat N, Birger M, et al. Development assistance for health: past trends, associations, and the future of international financial flows for health. Lancet. 2016 Jun;387(10037):2536–44.
  - h. Dieleman JL, Graves CM, Templin T, Johnson E, Baral R, Leach-Kemon K, et al. Global Health Development Assistance Remained Steady In 2013 But Did Not Align With Recipients’ Disease Burden. Health Aff. 2014 May 2;33(5):878–86.
  - i. Ravishankar N, Gubbins P, Cooley RJ, Leach-Kemon K, Michaud CM, Jamison DT, et al. Financing of global health: tracking development assistance for health from 1990 to 2007. Lancet. 2009 Jun;373(9681):2113–24.
  - j. Hawton K, Saunders KE, O’Connor RC. Self-harm and suicide in adolescents. Lancet. 2012 Jun;379(9834):2373–82.
  - k. GoodTherapy website. Therapy for Self Harm, Therapist for Self Harm Issues [Internet]. [cited 2018 Jan 12]. Available from: <https://www.goodtherapy.org/learn-about-therapy/issues/self-harm>
  - l. World Health Organization. WHO | Assessment for self harm/suicide in persons with priority mental, neurological and substance use disorders. WHO [Internet]. 2016 [cited 2018 Jan 12]; Available from: [http://www.who.int/mental\\_health/mhgap/evidence/suicide/q1/en/](http://www.who.int/mental_health/mhgap/evidence/suicide/q1/en/)
  - m. World Health Organization. WHO | Youth violence [Internet]. WHO. World Health Organization; 2016 [cited 2017 Aug 9]. Available from: [http://who.int/violence\\_injury\\_prevention/violence/youth/en/](http://who.int/violence_injury_prevention/violence/youth/en/)
  - n. Krug EG, Mercy JA, Dahlberg LL, Zwi AB. The world report on violence and health. Lancet. 2002 Oct 5;360(9339):1083–8.

**Appendix Table 13. Keywords to identify projects on mental disorders in the Creditor Reporting System (continued)**

- o. Resnick MD, Bearman PS, Blum RW, Bauman KE, Harris KM, Jones J, et al. Protecting Adolescents From Harm. *JAMA*. 1997 Sep 10;278(10):823.
- p. Kessler RC, Berglund P, Demler O, Jin R, Koretz D, Merikangas KR, et al. The Epidemiology of Major Depressive Disorder. *JAMA*. 2003 Jun 18;289(23):3095.
- q. Cuijpers P, Beekman ATF, Reynolds CF, III. Preventing depression: a global priority. *JAMA*. 2012 Mar 14;307(10):1033–4.
- r. Mayo Clinic. Depression (major depressive disorder) - Diagnosis and treatment - Mayo Clinic [Internet]. [cited 2018 Jan 12]. Available from: <https://www.mayoclinic.org/diseases-conditions/depression/diagnosis-treatment/drc-2035601>
- s. MacGregor AJ, Andrew T, Sambrook PN, Spector TD. Structural, psychological, and genetic influences on low back and neck pain: A study of adult female twins. *Arthritis Care Res (Hoboken)*. 2004 Apr 15;51(2):160–7.
- t. World Health Organization. Psychosocial Support [Internet]. WHO. World Health Organization; 2006 [cited 2017 Nov 1]. Available from: <http://www.who.int/hiv/topics/psychosocial/support/en/>



**Appendix Table 14. Keywords to identify projects on nutrition-related diseases in the Creditor Reporting System**

|                           |                   |                     |                          |                             |                   |
|---------------------------|-------------------|---------------------|--------------------------|-----------------------------|-------------------|
| anemia                    | energy            | heme iron           | low BMI                  | pica                        | vitamin B2        |
| anemia                    | fat               | hematologic         | magnesium sulphate       | protein                     | vitamin B3        |
| anthropometric            | folic acid        | hemoglobin          | malnutrition             | protein-energy malnutrition | vitamin D         |
| beeturia                  | food              | hunger              | micronutrient            | starvation                  | wasting           |
| BMI                       | food safety       | intravenous iron    | nourish                  | starve                      | WAZ               |
| calcium                   | growth monitoring | iodine deficiencies | nutrition                | starving                    | weight            |
| carbohydrate              | HAZ               | iodine deficiency   | nutritional deficiencies | stunting                    | weight for age    |
| complementary feeding     | Hb concentration  | iron deficiency     | nutritional deficiency   | under-nutrition             | weight for height |
| complete blood count      | height            | iron supplement     | nutritional package      | undernutrition              | weight-for-age    |
| dietary                   | height for age    | iron supply         | nutritional supplement   | underweight                 | weight-for-height |
| dietary iron deficiencies | height-for-age    | iron-deficiency     | pagophagia               | vitamin A                   | zinc              |
| dietary iron deficiency   | hematocrit        | ischemic            | phosphorus               | vitamin B1                  |                   |

**Note:**

1. We have translated all the keywords listed above to Spanish, French, Portuguese, Italian, Dutch, German, Norwegian, and Swedish
2. We performed keywords searching using 1) all lower case; 2) all upper case; 3) capitalize the first letter of each word 4) capitalize the first letter of the term
3. To prevent missing keywords containing unrecognizable characters (e.g. “f?ver”), we replaced each letter of the keywords in the table with “?”, “??” “/” or spacing.
4. Reference:
  - a. Global Burden of Disease Collaborative Network. Global Burden of Disease Study 2017 (GBD 2017) Results. [Internet]. Seattle, United States: Institute for Health Metrics and Evaluation (IHME). 2018 [cited 2018 Dec 19]. Available from: <http://ghdx.healthdata.org/gbd-results-tool>
  - b. Lu C, Chu A, Li Z, Shen J, Subramanian S, Hill K. Assessing development assistance for child survival between 2000 and 2014: A multi-sectoral perspective. Fan VY, editor. PLoS One. 2017 Jul 11;12(7):e0178887.
  - c. Li Z, Li M, Patton GC, Lu C. Global Development Assistance for Adolescent Health From 2003 to 2015. JAMA Netw Open. 2018 Aug 10;1(4):e181072.
  - d. ICD. 2018 ICD-10-CM Codes [Internet]. [cited 2018 Jan 11]. Available from: <http://www.icd10data.com/ICD10CM/Codes>
  - e. Dieleman JL, Schneider MT, Haakenstad A, Singh L, Sadat N, Birger M, et al. Development assistance for health: past trends, associations, and the future of international financial flows for health. Lancet. 2016 Jun;387(10037):2536–44.
  - f. Dieleman JL, Graves CM, Templin T, Johnson E, Baral R, Leach-Kemon K, et al. Global Health Development Assistance Remained Steady In 2013 But Did Not Align With Recipients’ Disease Burden. Health Aff. 2014 May 2;33(5):878–86.
  - g. Ravishankar N, Gubbins P, Cooley RJ, Leach-Kemon K, Michaud CM, Jamison DT, et al. Financing of global health: tracking development assistance for health from 1990 to 2007. Lancet. 2009 Jun;373(9681):2113–24.
  - h. World Health Organization. Diet, nutrition and the prevention of chronic diseases [Internet]. WHO. World Health Organization; 2014 [cited 2019 Mar 28]. Available from: <https://www.who.int/dietphysicalactivity/publications/trs916/summary/en/>
  - i. Bermejo F, García-López S. A guide to diagnosis of iron deficiency and iron deficiency anemia in digestive diseases. World J Gastroenterol. 2009 Oct 7;15(37):4638–43.
  - j. Camaschella C. Iron-Deficiency Anemia. Longo DL, editor. N Engl J Med. 2015 May 7;372(19):1832–43.

**Appendix Table 15. Keywords to identify projects on non-communicable diseases, excluding nutrition, and mental diseases in the Creditor Reporting System**

|                                    |                            |                           |                             |                               |                               |
|------------------------------------|----------------------------|---------------------------|-----------------------------|-------------------------------|-------------------------------|
| autoimmun                          | cleft lip                  | Gastritis                 | kidney disease              | non communicable              | sclerosis                     |
| abdominal hernia                   | cleft palate               | GFR                       | ligament sprain             | non infectious                | Silicosis                     |
| Alzheimer                          | cold therapy               | gland swelling            | limb anomalies              | non-communicable              | Skin                          |
| Aortic aneurysm                    | compression fracture       | glomerulonephritis        | low back                    | non-infectious                | smoke                         |
| Appendicitis                       | congenital anomalies       | gyn                       | low back pain               | non-transmissible             | smoking                       |
| artery                             | Congenital musculoskeletal | Gynecological             | low-back pain               | noncommunicable               | spinal stenosis               |
| arthritis                          | copd                       | haemophilia               | lower back                  | not infectious                | spondylolisthesis             |
| Asbestosis                         | deformity                  | hamstring                 | lower back and neck pain    | obesity                       | stenosis with myelopathy      |
| Asthma                             | degenerative disc disease  | heart anomalies           | lower back muscle           | obstructive pulmonary disease | Stroke                        |
| Atrial fibrillation                | dementias                  | heart disease             | lower-back                  | oral health                   | subcutaneous                  |
| back muscle                        | dental                     | heat therapy              | lumbago                     | Orofacial cleft               | sun burn                      |
| biliary disease                    | diabet                     | Hemoglobinopathies        | Lumbalgia                   | osteoarthritis                | sunburn                       |
| bowel disease                      | diabete                    | hemolytic                 | lumbar disc herniation      | osteomyelitis                 | thalassemia                   |
| cancer                             | Digestive                  | hemophilia                | lumbar herniated disc       | ovarian                       | Thalassemas                   |
| cardiomyopathy                     | Down syndrome              | hemorrhage                | lumbar Spine                | overweight                    | tobacco                       |
| cardiovascular                     | duodenitis                 | hernia                    | lung                        | Pancreatitis                  | tumor                         |
| cavity                             | Endocarditis               | herniated disc            | lymph node (gland) swelling | Paralytic ileus               | ulcer                         |
| Cellulitis                         | endocrine                  | hypertension              | lymph node swelling         | Parkinson                     | urinary disease               |
| cervical degenerative disc disease | Endometriosis              | IHD                       | musclestrain                | Peripheral artery             | Urinary tract infection       |
| cervical osteoarthritis            | endorphin                  | immune disorder           | Musculoskeletal             | phenylketonuria               | urogenital                    |
| cervical spine                     | Epilepsy                   | infertility               | myocarditis                 | pinched nerve                 | Urolithiasis                  |
| chemotherapy                       | exercise core              | Inguinal                  | Nasopharynx                 | Pneumoconiosis                | Uterine                       |
| chromosomal abnormalities          | facet joint osteoarthritis | inner endorphin           | NCD                         | pulled back muscle            | Vascular                      |
| chronic disease                    | femoral                    | insulin                   | neck injury                 | pulmonary                     | virus infection of the throat |
| chronic liver disease              | fibroid                    | intestinal                | neck pain                   | Pyoderma                      | whiplash                      |
| chronic respiratory disease        | flutter                    | intestinal disorder       | neck strain                 | radiation                     |                               |
| circulatory                        | foraminal stenosis         | isthmus spondylolisthesis | Neurological disorder       | restorative sleep             |                               |
| cirrhosis                          | Gallbladder                | kidney                    | neuron                      | sacroiliac joint dysfunction  |                               |

**Note:**

1. We have translated all the keywords listed above to Spanish, French, Portuguese, Italian, Dutch, German, Norwegian, and Swedish
2. We performed keywords searching using 1) all lower case; 2) all upper case; 3) capitalize the first letter of each word 4) capitalize the first letter of the term
3. To prevent missing keywords containing unrecognizable characters (e.g. "f?ver"), we replaced each letter of the keywords in the table with "?", "??", "/" or spacing.

**Appendix Table 15. Keywords to identify projects on non-communicable diseases, excluding nutrition, and mental diseases in the Creditor Reporting System (continued)**

## 4. Reference:

- a. Global Burden of Disease Collaborative Network. Global Burden of Disease Study 2017 (GBD 2017) Results. [Internet]. Seattle, United States: Institute for Health Metrics and Evaluation (IHME). 2018 [cited 2018 Dec 19]. Available from: <http://ghdx.healthdata.org/gbd-results-tool>
- b. Lu C, Chu A, Li Z, Shen J, Subramanian S, Hill K. Assessing development assistance for child survival between 2000 and 2014: A multi-sectoral perspective. Fan VY, editor. PLoS One. 2017 Jul 11;12(7):e0178887.
- c. Li Z, Li M, Patton GC, Lu C. Global Development Assistance for Adolescent Health From 2003 to 2015. JAMA Netw Open. 2018 Aug 10;1(4):e181072.
- d. ICD. 2018 ICD-10-CM Codes [Internet]. [cited 2018 Jan 11]. Available from: <http://www.icd10data.com/ICD10CM/Codes>
- e. Dieleman JL, Schneider MT, Haakenstad A, Singh L, Sadat N, Birger M, et al. Development assistance for health: past trends, associations, and the future of international financial flows for health. Lancet. 2016 Jun;387(10037):2536–44.
- f. Dieleman JL, Graves CM, Templin T, Johnson E, Baral R, Leach-Kemon K, et al. Global Health Development Assistance Remained Steady In 2013 But Did Not Align With Recipients' Disease Burden. Health Aff. 2014 May 2;33(5):878–86.
- g. Ravishankar N, Gubbins P, Cooley RJ, Leach-Kemon K, Michaud CM, Jamison DT, et al. Financing of global health: tracking development assistance for health from 1990 to 2007. Lancet. 2009 Jun;373(9681):2113–24.
- h. World Health Organization. 2013-2020 Global Action Plan for the Prevention and Control of Noncommunicable Diseases [Internet]. 2013 [cited 2018 Nov 12]. Available from: [http://apps.who.int/iris/bitstream/handle/10665/94384/9789241506236\\_eng.pdf?sequence=1](http://apps.who.int/iris/bitstream/handle/10665/94384/9789241506236_eng.pdf?sequence=1)
- i. Strine TW, Hootman JM. US national prevalence and correlates of low back and neck pain among adults. Arthritis Rheum. 2007 May 15;57(4):656–65.

**Appendix Table 16. Keywords to identify projects on injury and physical rehabilitation in the Creditor Reporting System**

|                       |                          |                        |                                    |                      |                                                              |
|-----------------------|--------------------------|------------------------|------------------------------------|----------------------|--------------------------------------------------------------|
| alcohol control study | falls                    | injury                 | police conflict                    | safe system approach | traffic injuries                                             |
| accident              | firearm                  | Interpersonal violence | pulmonary aspiration               | safer road           | transport among school children                              |
| accidents             | firearm injuries         | knife                  | railway safety                     | school bus           | transport improvement                                        |
| alcohol testing       | forces of nature         | knives                 | road accident                      | school transport     | transport injuries                                           |
| caring roadway        | foreign body             | mechanical force       | road across the street             | seat belt use        | transport services                                           |
| cyclist               | gun                      | motorcyclist injuries  | road cooperative                   | sharp object         | transport services for boys and girls working in the streets |
| drown                 | head-on crash            | motorcyclist           | road crash                         | speed compliance     | transportation safety                                        |
| drowning              | helmet                   | pedestrian injuries    | road injuries                      | suffocation          | unintentional injuries                                       |
| execute               | helmet awareness raising | pedestrian safety      | road management and safety project | terrorism            | vehicle safety                                               |
| execution             | helmet wearing campaign  | physical violence      | road risk                          | traffic accident     | violence                                                     |
| falling               | injuries                 | poisoning              | road safety                        | traffic education    | young driver                                                 |

**Note:**

1. We have translated all the keywords listed above to Spanish, French, Portuguese, Italian, Dutch, German, Norwegian, and Swedish
2. We performed keywords searching using 1) all lower case; 2) all upper case; 3) capitalize the first letter of each word 4) capitalize the first letter of the term
3. To prevent missing keywords containing unrecognizable characters (e.g. “f?ver”), we replaced each letter of the keywords in the table with “?”, “??” “/” or spacing.
4. Reference:
  - j. Global Burden of Disease Collaborative Network. Global Burden of Disease Study 2017 (GBD 2017) Results. [Internet]. Seattle, United States: Institute for Health Metrics and Evaluation (IHME). 2018 [cited 2018 Dec 19]. Available from: <http://ghdx.healthdata.org/gbd-results-tool>
  - k. Lu C, Chu A, Li Z, Shen J, Subramanian S, Hill K. Assessing development assistance for child survival between 2000 and 2014: A multi-sectoral perspective. Fan VY, editor. PLoS One. 2017 Jul 11;12(7):e0178887.
  - l. Li Z, Li M, Patton GC, Lu C. Global Development Assistance for Adolescent Health From 2003 to 2015. JAMA Netw Open. 2018 Aug 10;1(4):e181072.
  - m. ICD. 2018 ICD-10-CM Codes [Internet]. [cited 2018 Jan 11]. Available from: <http://www.icd10data.com/ICD10CM/Codes>
  - n. Dieleman JL, Schneider MT, Haakenstad A, Singh L, Sadat N, Birger M, et al. Development assistance for health: past trends, associations, and the future of international financial flows for health. Lancet. 2016 Jun;387(10037):2536–44.
  - o. Dieleman JL, Graves CM, Templin T, Johnson E, Baral R, Leach-Kemon K, et al. Global Health Development Assistance Remained Steady In 2013 But Did Not Align With Recipients’ Disease Burden. Health Aff. 2014 May 2;33(5):878–86.
  - p. Ravishankar N, Gubbins P, Cooley RJ, Leach-Kemon K, Michaud CM, Jamison DT, et al. Financing of global health: tracking development assistance for health from 1990 to 2007. Lancet. 2009 Jun;373(9681):2113–24.
  - q. American Academy of Pediatrics Committee on Injury, Violence, and Poison Prevention, Violence and PP, Wentz KR, Gore EJ, Copass MK. Prevention of drowning. Pediatrics. 2010 Jul 1;126(1):178–85.

**Appendix Table 16. Keywords to identify projects on injury and physical rehabilitation in the Creditor Reporting System (continued)**

- r. World Health Organization. World report on child injury prevention. WHO [Internet]. 2015 [cited 2017 Dec 25]; Available from: [http://www.who.int/violence\\_injury\\_prevention/child/injury/world\\_report/en/](http://www.who.int/violence_injury_prevention/child/injury/world_report/en/)
- s. World Health Organization. WHO | Youth violence [Internet]. WHO. World Health Organization; 2016 [cited 2017 Aug 9]. Available from: [http://who.int/violence\\_injury\\_prevention/violence/youth/en/](http://who.int/violence_injury_prevention/violence/youth/en/)
- t. Krug EG, Mercy JA, Dahlberg LL, Zwi AB. The world report on violence and health. *Lancet*. 2002 Oct 5;360(9339):1083–8.
- u. Resnick MD, Bearman PS, Blum RW, Bauman KE, Harris KM, Jones J, et al. Protecting Adolescents From Harm. *JAMA*. 1997 Sep 10;278(10):823.

**Appendix Figure 1. The proportion of development assistance (DA) for reproductive, maternal, newborn, child and adolescent health of total development health assistance in the 25 conflict-affected countries, 2003-2017 (lower- and upper-bound estimates)**

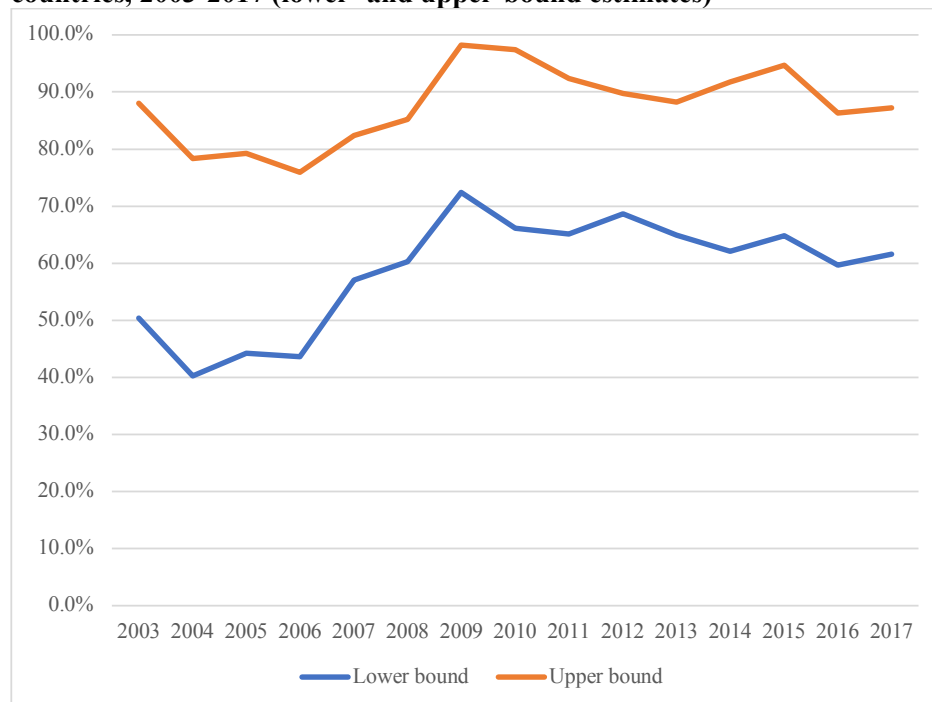

**Note:**

1. The development health assistance disbursement values based on the authors' estimation including all projects with the sector code 120 (Health, Total), 121 (Health, General), 122 (Basic Health), and 130 (Population policies/programmes & Reproductive Health). We also included projects with the primary purpose to prevent diseases, maintain, restore, and improve health, that were first identified using keywords in Appendix Table 7 and then manually screened.

**Appendix Figure 2. The proportion of development assistance (DA) for HIV/AIDS in DA on reproductive health (DA-RH) vs. the proportion of disability-adjusted life years (DALYs) caused by HIV/AIDS in all DALYs caused by RH in the 25 conflict-affected countries**

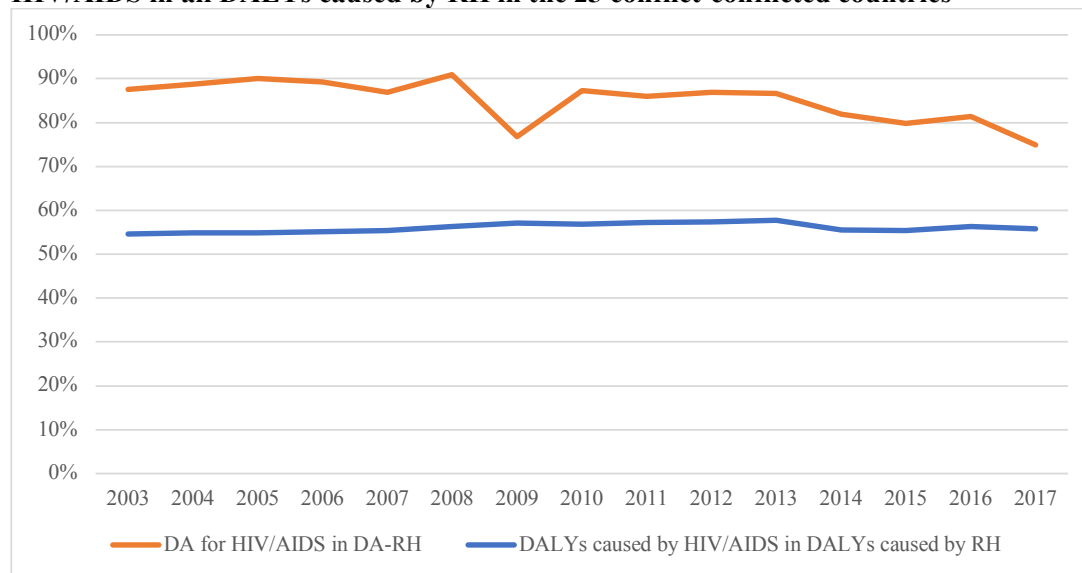

**Appendix Figure 3. Annual trend of development assistance for reproductive, maternal, newborn, child, and adolescent health in 25 conflict-affected countries (\$ million) by health, upper bound estimates**

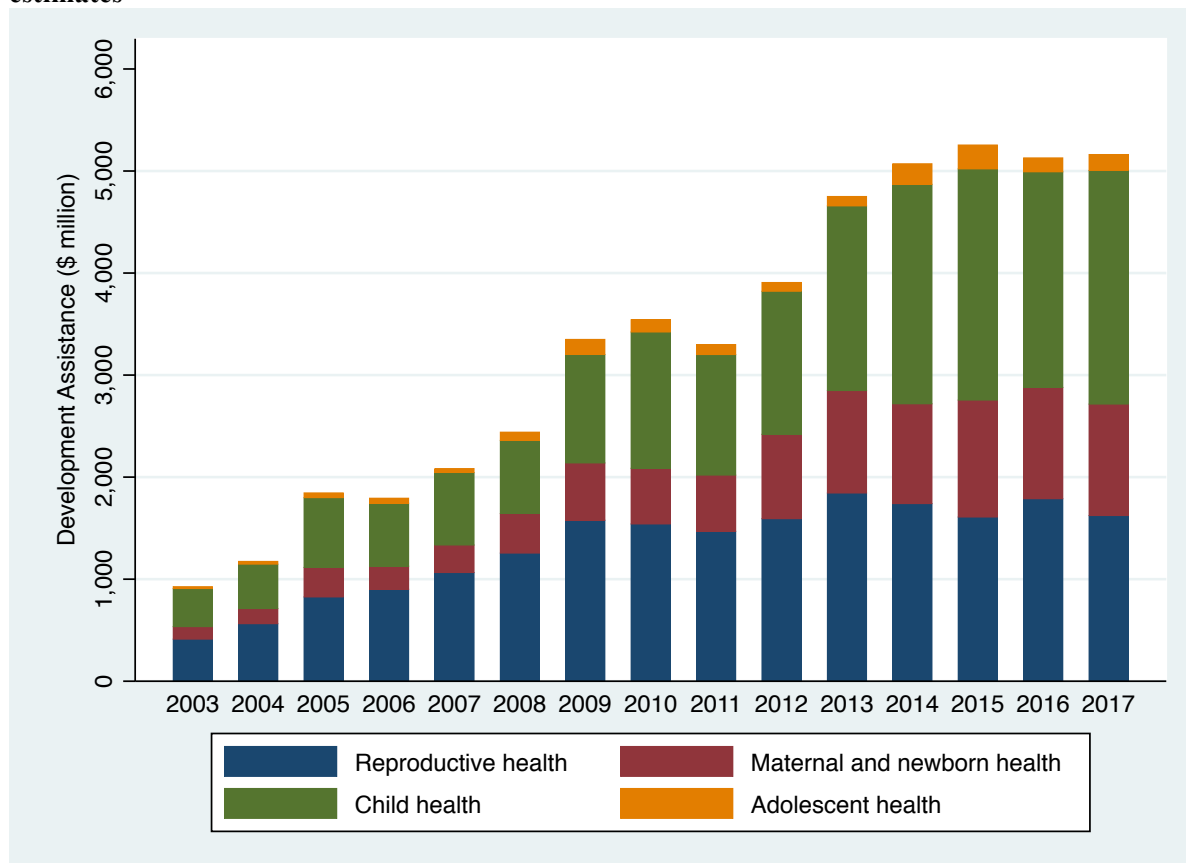



**Appendix Figure 4. Annual trend of development assistance for reproductive, maternal, newborn, child, and adolescent health (lower bound, \$ million) by donor in the 25 conflict-affected countries**

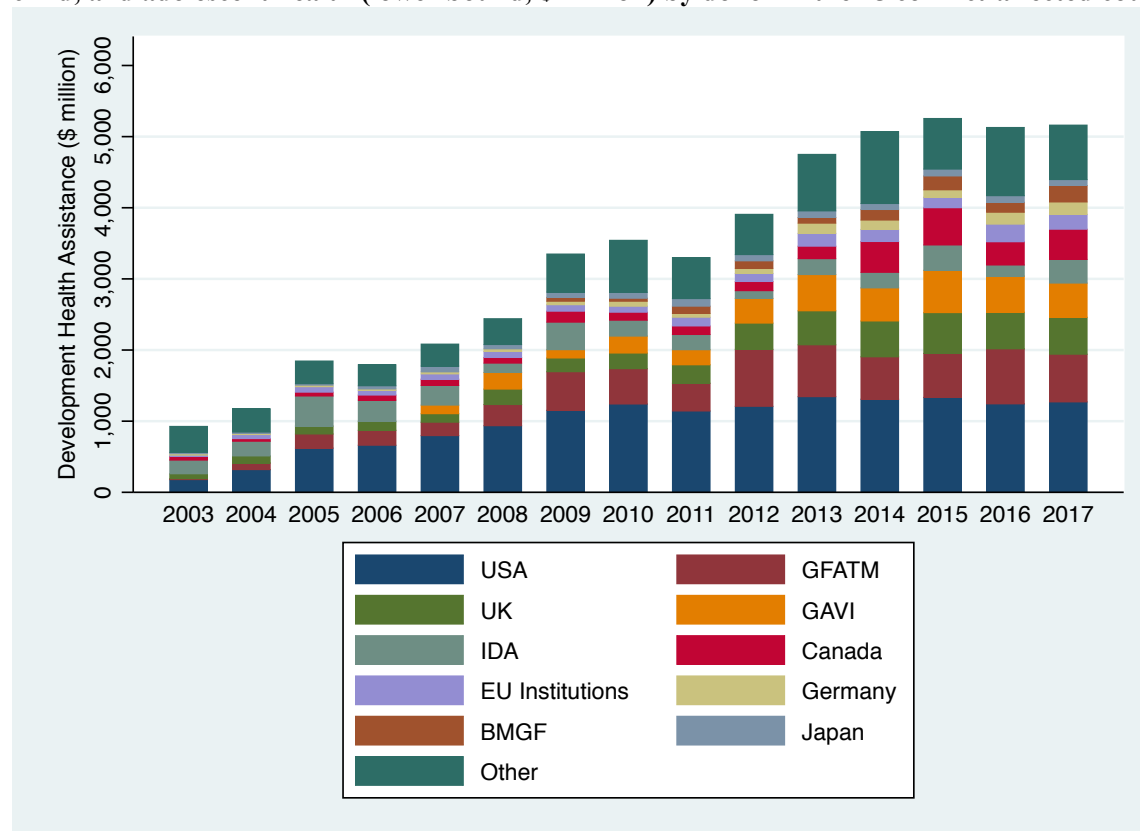

**Note:**

USA represents “United States”, GFATM represents “Global Fund to Fight AIDS, Tuberculosis and Malaria”, GAVI represents “Global Alliance for Vaccines and Immunization”, UK represents “United Kingdom”, IDA represents “International Development Association”, UNFPA represents “United Nations Population Fund”, BMFG represents “Bill & Melinda Gates Foundation”.

**Appendix Figure 5. Annual trend of development assistance for reproductive, maternal, newborn, child, and adolescent health (upper bound, \$ million) by donor in the 25 conflict-affected countries**

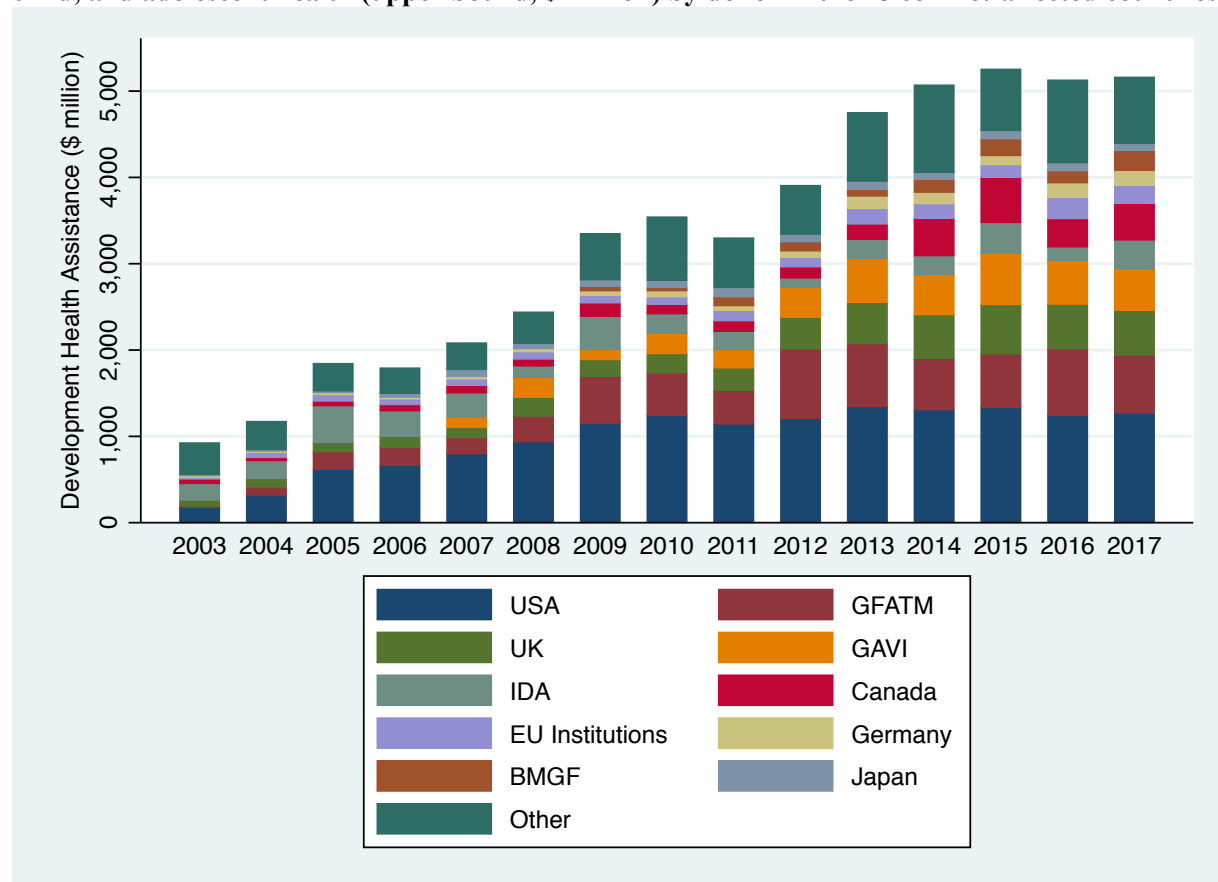

**Note:**

USA represents “United States”, GFATM represents “Global Fund to Fight AIDS, Tuberculosis and Malaria”, GAVI represents “Global Alliance for Vaccines and Immunization”, UK represents “United Kingdom”, IDA represents “International Development Association”, UNFPA represents “United Nations Population Fund”, BMGF represents “Bill & Melinda Gates Foundation”.

**Appendix Table 17. Annual trend of development assistance for reproductive health (DA-RH) per person aged 15-49 years old, development assistance for maternal and newborn health (DA-MNH) per birth, development assistance for child health (DA-CH) per child aged one month to nine years old, and development assistance for adolescent health (DA-AH) per adolescent aged 10-24 years old in the 25 conflict-affected countries, upper bound, 2003-2017 (US\$)**

|                   | 2003 | 2004 | 2005  | 2006 | 2007  | 2008  | 2009  | 2010  | 2011  | 2012  | 2013  | 2014  | 2015  | 2016  | 2017  | Total  | Annual growth rate |
|-------------------|------|------|-------|------|-------|-------|-------|-------|-------|-------|-------|-------|-------|-------|-------|--------|--------------------|
| DA-RH per capita  |      |      |       |      |       |       |       |       |       |       |       |       |       |       |       |        |                    |
| Overall           | 0.62 | 0.83 | 1.10  | 1.18 | 1.36  | 1.57  | 1.94  | 1.85  | 1.71  | 1.81  | 2.05  | 1.90  | 1.72  | 1.87  | 1.66  | 23.17  | 7.3%               |
| SSA               | 0.92 | 1.35 | 1.67  | 1.86 | 2.17  | 2.89  | 3.42  | 3.23  | 2.92  | 3.12  | 3.34  | 2.99  | 2.67  | 2.86  | 2.66  | 38.08  | 7.8%               |
| Non-SSA           | 0.37 | 0.40 | 0.69  | 0.67 | 0.75  | 0.57  | 0.78  | 0.77  | 0.71  | 0.73  | 0.98  | 0.97  | 0.90  | 1.00  | 0.77  | 11.06  | 5.4%               |
| DA-MNH per capita |      |      |       |      |       |       |       |       |       |       |       |       |       |       |       |        |                    |
| Overall           | 5.13 | 6.10 | 11.44 | 8.77 | 10.30 | 14.54 | 20.72 | 19.85 | 19.54 | 28.89 | 34.70 | 33.43 | 38.75 | 36.52 | 35.68 | 324.36 | 14.9%              |
| SSA               | 4.70 | 6.49 | 12.62 | 8.17 | 11.38 | 12.99 | 24.90 | 18.30 | 20.38 | 29.85 | 32.51 | 30.93 | 41.41 | 37.01 | 35.99 | 327.63 | 15.6%              |
| Non-SSA           | 5.66 | 5.61 | 10.02 | 9.49 | 8.96  | 16.48 | 15.45 | 21.83 | 18.41 | 27.60 | 37.71 | 36.93 | 34.99 | 35.81 | 35.23 | 320.16 | 14.0%              |
| DA-CH per capita  |      |      |       |      |       |       |       |       |       |       |       |       |       |       |       |        |                    |
| Overall           | 1.92 | 2.21 | 3.31  | 2.93 | 3.31  | 3.27  | 4.76  | 5.87  | 5.01  | 5.83  | 7.38  | 8.63  | 8.94  | 8.20  | 8.73  | 80.29  | 11.4%              |
| SSA               | 1.62 | 2.24 | 3.57  | 2.73 | 3.44  | 3.74  | 5.43  | 5.43  | 5.48  | 6.89  | 7.74  | 8.77  | 9.80  | 8.21  | 8.74  | 83.84  | 12.8%              |
| Non-SSA           | 2.23 | 2.16 | 3.05  | 3.14 | 3.17  | 2.76  | 4.02  | 6.36  | 4.46  | 4.56  | 6.96  | 8.45  | 7.87  | 8.18  | 8.72  | 76.08  | 10.2%              |
| DA-AH per capita  |      |      |       |      |       |       |       |       |       |       |       |       |       |       |       |        |                    |
| Overall           | 0.09 | 0.12 | 0.20  | 0.21 | 0.16  | 0.33  | 0.59  | 0.47  | 0.37  | 0.32  | 0.34  | 0.73  | 0.82  | 0.47  | 0.53  | 5.74   | 13.7%              |
| SSA               | 0.13 | 0.18 | 0.25  | 0.20 | 0.15  | 0.26  | 0.36  | 0.33  | 0.31  | 0.35  | 0.37  | 0.44  | 0.65  | 0.47  | 0.63  | 5.07   | 12.2%              |
| Non-SSA           | 0.06 | 0.08 | 0.16  | 0.21 | 0.17  | 0.38  | 0.77  | 0.58  | 0.43  | 0.30  | 0.31  | 0.99  | 0.98  | 0.48  | 0.43  | 6.32   | 15.7%              |

**Note:**

1. We estimate the number of births using the total population multiplied by crude birth rate. See <http://adph.org/healthstats/assets/Formulas.pdf>.
1. SSA represents the category “Sub-Saharan Africa”; Non-SSA represents the category of “Non Sub-Saharan Africa”.
2. Annual growth rate= $((\text{end value}/\text{start value})^{1/\text{periods}}) - 1$ .

**Appendix Figure 6. The rank of A) development assistance for reproductive health (DA-RH) per person aged 15-49 years old, B) development assistance for maternal and newborn health (DA-MNH) per birth, C) development assistance for child health (DA-CH) per child aged one month to nine years old, and D) development assistance for adolescent health (DA-AH) per adolescent aged 10-24 years old in the 25 conflict-affected countries, cumulatively received between 2003-2017, upper bound (US\$)**

**A) DA-RH per capita**

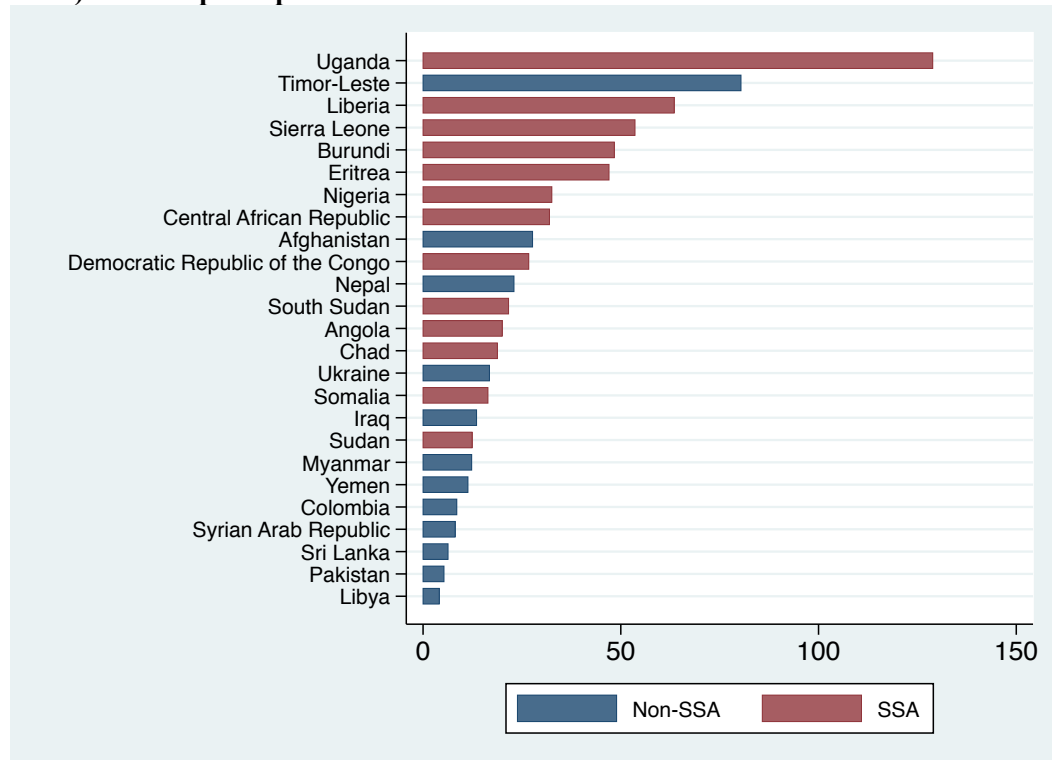

**B) DA-MNH per capita**

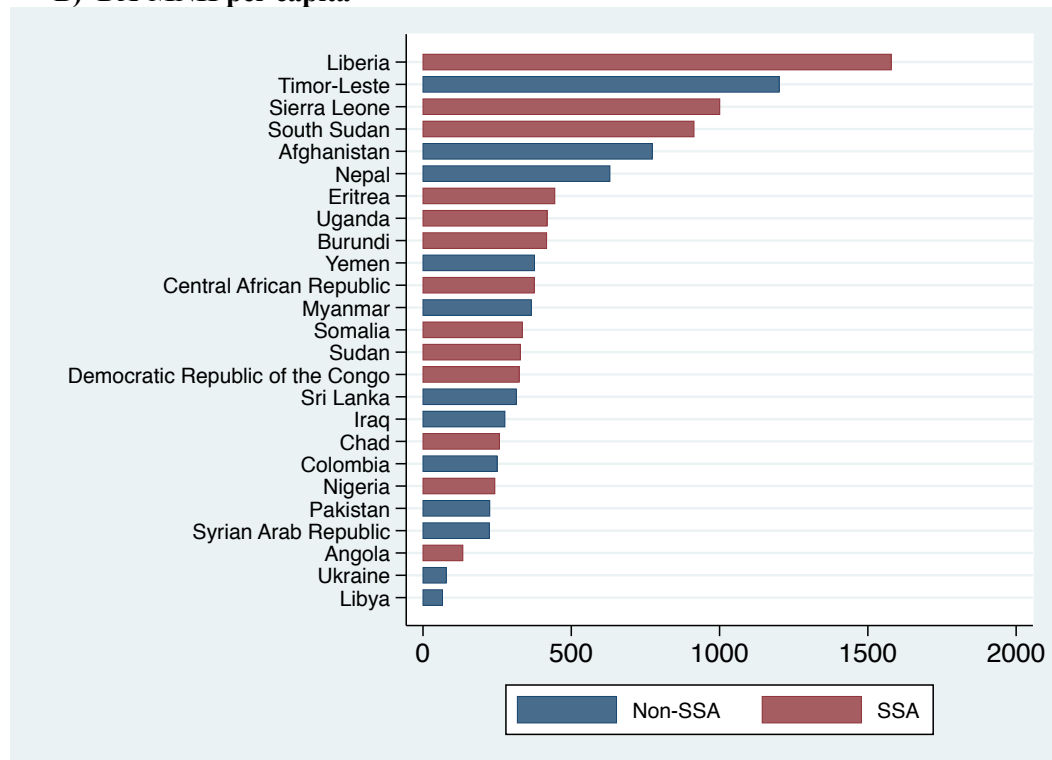

**C) DA-CH per capita**

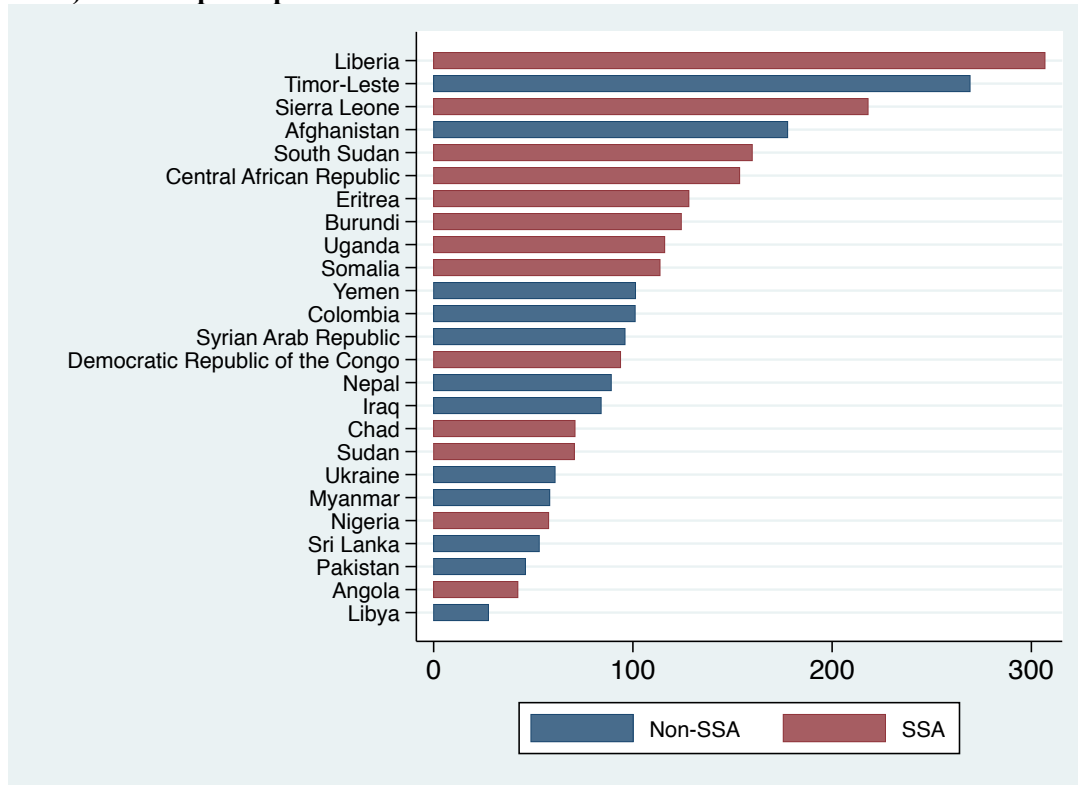

**D) DA-AH per capita**

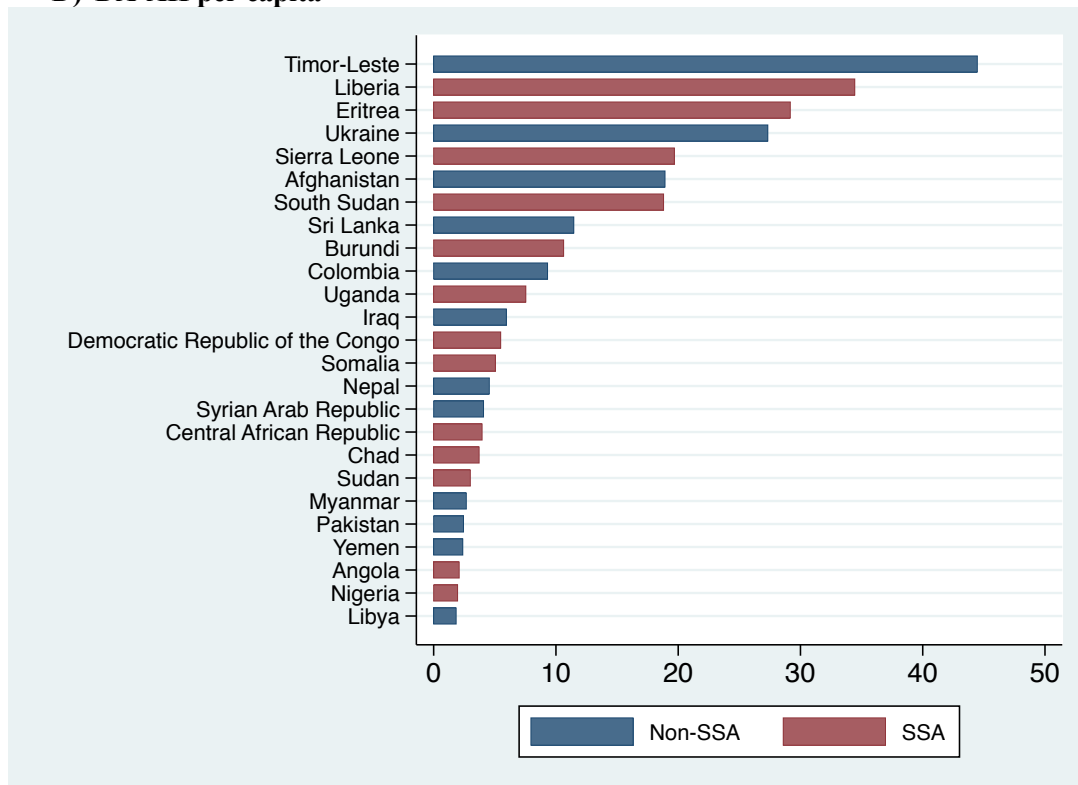

Appendix Table 18. Lower bound of development assistance for reproductive health per person aged 15-49 years old by recipient country, 2003-2017 (\$US)

| Country                          | SSA | Region                | 2003 | 2004 | 2005 | 2006 | 2007 | 2008 | 2009 | 2010 | 2011 | 2012 | 2013 | 2014 | 2015 | 2016 | 2017 | Total | Annual growth rate |
|----------------------------------|-----|-----------------------|------|------|------|------|------|------|------|------|------|------|------|------|------|------|------|-------|--------------------|
| Afghanistan                      | No  | Eastern Mediterranean | 0.4  | 0.1  | 0.2  | 0.1  | 0.1  | 0.9  | 2.3  | 1.6  | 1.3  | 1.5  | 0.7  | 1.1  | 1.2  | 0.8  | 1.5  | 13.7  | 9.8%               |
| Angola                           | Yes | Africa                | 0.8  | 1.1  | 1.7  | 1.4  | 1.2  | 1.7  | 1.2  | 1.5  | 1.2  | 1.1  | 1.4  | 0.8  | 0.9  | 1.2  | 1.3  | 18.4  | 3.8%               |
| Burundi                          | Yes | Africa                | 0.9  | 1.5  | 2.2  | 2.8  | 1.7  | 2.5  | 3.9  | 2.7  | 3.3  | 2.4  | 3.1  | 3.4  | 3.3  | 3.2  | 3.9  | 40.8  | 10.8%              |
| Central African Republic         | Yes | Africa                | 1.4  | 1.7  | 1.7  | 2.6  | 1.0  | 3.7  | 1.4  | 1.9  | 1.6  | 0.8  | 0.7  | 1.0  | 0.9  | 1.6  | 1.0  | 23.0  | -2.5%              |
| Chad                             | Yes | Africa                | 0.8  | 0.8  | 1.1  | 0.8  | 0.5  | 0.7  | 1.0  | 1.3  | 1.8  | 0.8  | 1.3  | 1.0  | 0.8  | 0.3  | 0.5  | 13.3  | -3.0%              |
| Colombia                         | No  | Americas              | 0.0  | 0.1  | 0.2  | 0.3  | 0.2  | 0.2  | 0.5  | 0.2  | 0.5  | 0.3  | 0.5  | 0.2  | 0.2  | 0.2  | 0.1  | 3.4   | 8.9%               |
| Democratic Republic of the Congo | Yes | Africa                | 0.5  | 0.5  | 1.0  | 1.0  | 1.0  | 1.4  | 1.1  | 1.9  | 1.4  | 2.0  | 1.8  | 1.4  | 2.0  | 2.4  | 2.6  | 21.9  | 12.1%              |
| Eritrea                          | Yes | Africa                | 4.5  | 5.9  | 7.6  | 3.0  | 4.2  | 4.7  | 2.3  | 2.5  | 1.3  | 1.1  | 0.8  | 3.8  | 0.9  | 1.9  | 0.1  | 44.5  | -25.0%             |
| Iraq                             | No  | Eastern Mediterranean | 0.1  | 0.0  | 0.0  | 0.0  | 0.0  | 0.0  | 0.1  | 0.0  | 0.0  | 0.0  | 0.1  | 0.4  | 0.2  | 0.4  | 0.6  | 2.0   | 20.1%              |
| Liberia                          | Yes | Africa                | 0.6  | 1.1  | 2.4  | 2.1  | 3.4  | 4.3  | 4.6  | 5.3  | 5.0  | 3.4  | 3.7  | 3.9  | 3.4  | 4.3  | 4.2  | 51.5  | 15.1%              |
| Libya                            | No  | Eastern Mediterranean |      |      | 0.0  | 0.1  | 0.2  | 0.3  | 0.3  | 0.1  | 0.3  | 0.1  | 0.2  | 0.0  | 0.1  | 0.2  | 0.2  | 2.2   | 29.9%              |
| Myanmar                          | No  | South-East Asia       | 0.3  | 0.4  | 0.6  | 0.2  | 0.4  | 0.5  | 0.5  | 1.1  | 0.8  | 0.7  | 1.2  | 0.9  | 1.1  | 1.5  | 0.8  | 11.0  | 7.0%               |
| Nepal                            | No  | South-East Asia       | 1.1  | 1.2  | 1.5  | 1.7  | 1.2  | 1.1  | 1.1  | 1.6  | 1.4  | 1.2  | 1.9  | 1.7  | 1.9  | 0.9  | 0.6  | 20.1  | -4.1%              |
| Nigeria                          | Yes | Africa                | 0.5  | 0.6  | 0.9  | 1.4  | 1.8  | 2.8  | 2.6  | 2.9  | 2.6  | 2.8  | 3.6  | 2.6  | 2.3  | 2.1  | 1.7  | 31.2  | 8.7%               |
| Pakistan                         | No  | Eastern Mediterranean | 0.2  | 0.1  | 0.2  | 0.1  | 0.6  | 0.1  | 0.3  | 0.2  | 0.2  | 0.2  | 0.4  | 0.3  | 0.5  | 0.3  | 0.3  | 4.0   | 4.2%               |
| Sierra Leone                     | Yes | Africa                | 1.1  | 1.1  | 2.0  | 1.4  | 1.9  | 2.3  | 3.8  | 4.0  | 3.4  | 3.7  | 2.9  | 4.4  | 2.9  | 5.2  | 4.7  | 44.9  | 10.9%              |
| Somalia                          | Yes | Africa                | 0.3  | 0.2  | 0.6  | 0.7  | 1.1  | 0.5  | 0.6  | 1.2  | 1.5  | 1.5  | 1.4  | 1.4  | 0.8  | 1.5  | 1.4  | 14.7  | 11.5%              |
| South Sudan                      | Yes | Africa                |      |      |      |      |      |      |      |      | 0.8  | 1.5  | 2.5  | 4.7  | 3.4  | 1.9  | 3.6  | 18.4  | 27.9%              |
| Sri Lanka                        | No  | South-East Asia       | 0.1  | 0.1  | 0.2  | 0.2  | 0.2  | 0.2  | 0.4  | 0.4  | 0.5  | 0.2  | 0.4  | 0.1  | 0.4  | 0.1  | 0.1  | 3.5   | -1.5%              |
| Sudan                            | Yes | Africa                | 0.1  | 0.2  | 0.5  | 1.0  | 0.7  | 1.1  | 0.9  | 1.5  | 1.3  | 0.6  | 0.5  | 0.5  | 0.3  | 0.5  | 0.3  | 9.9   | 6.6%               |
| Syrian Arab Republic             | No  | Eastern Mediterranean | 0.2  | 0.1  | 0.1  | 0.1  | 0.1  | 0.1  | 0.1  | 0.1  | 0.0  | 0.1  | 0.4  | 0.6  | 0.7  | 1.0  | 2.6  | 6.1   | 21.9%              |
| Timor-Leste                      | No  | South-East Asia       | 1.9  | 0.7  | 0.5  | 1.2  | 2.8  | 2.6  | 7.0  | 9.8  | 6.6  | 6.6  | 5.9  | 8.4  | 4.0  | 2.3  | 2.4  | 62.7  | 1.7%               |
| Uganda                           | Yes | Africa                | 2.7  | 5.8  | 5.2  | 5.7  | 7.8  | 7.8  | 14.1 | 8.9  | 8.7  | 10.6 | 10.3 | 9.1  | 8.7  | 10.3 | 9.3  | 125.1 | 9.1%               |
| Ukraine                          | No  | Europe                |      |      | 0.6  | 1.0  | 1.2  | 1.1  | 1.3  | 1.0  | 1.1  | 1.5  | 1.4  | 1.2  | 1.8  | 2.0  | 1.2  | 16.3  | 6.7%               |
| Yemen                            | No  | Eastern Mediterranean | 0.3  | 0.3  | 0.7  | 0.7  | 0.5  | 0.5  | 0.4  | 0.7  | 0.5  | 0.7  | 0.8  | 0.5  | 0.5  | 0.4  | 0.4  | 8.0   | 2.1%               |

**Note:**

1. If SSA is “Yes”, the country is a Sub-Saharan African country; If SSA is “No”, the country is not a Sub-Saharan African country.
2. Annual growth rate=((end value/start value)^(1/periods) -1).

**Appendix Table 19. Lower bound of development assistance for maternal and newborn health per birth by recipient country, 2003-2017 (\$US)**

| Country                          | SSA | Region                | 2003 | 2004 | 2005  | 2006 | 2007 | 2008 | 2009 | 2010  | 2011 | 2012  | 2013  | 2014  | 2015  | 2016  | 2017  | Total  | Annual growth rate |
|----------------------------------|-----|-----------------------|------|------|-------|------|------|------|------|-------|------|-------|-------|-------|-------|-------|-------|--------|--------------------|
| Afghanistan                      | No  | Eastern Mediterranean | 5.3  | 2.3  | 0.7   | 1.9  | 9.4  | 20.3 | 38.6 | 45.2  | 42.5 | 54.2  | 63.7  | 62.6  | 73.8  | 49.8  | 29.5  | 499.8  | 13.0%              |
| Angola                           | Yes | Africa                | 2.4  | 1.7  | 0.0   | 1.9  | 4.5  | 9.8  | 8.4  | 8.7   | 4.3  | 7.7   | 3.4   | 6.3   | 7.0   | 3.3   | 4.5   | 73.8   | 4.6%               |
| Burundi                          | Yes | Africa                | 6.8  | 8.4  | 16.9  | 6.6  | 14.0 | 10.6 | 20.1 | 25.7  | 46.4 | 18.6  | 19.4  | 21.1  | 20.4  | 46.9  | 15.5  | 297.4  | 6.1%               |
| Central African Republic         | Yes | Africa                | 0.0  | 0.1  |       | 0.5  | 2.1  | 11.5 | 9.5  | 13.8  | 14.1 | 10.2  | 21.4  | 27.8  | 28.1  | 52.1  | 15.5  | 206.5  | 45.0%              |
| Chad                             | Yes | Africa                | 20.4 | 25.9 | 20.3  | 8.8  | 4.0  | 6.7  | 6.5  | 27.2  | 15.7 | 12.7  | 6.9   | 8.9   | -15.4 | 16.1  | 14.6  | 179.3  | -2.4%              |
| Colombia                         | No  | Americas              | 0.4  | 0.7  | 1.5   | 3.2  | 3.5  | 4.5  | 5.0  | 7.9   | 5.7  | 5.9   | 4.5   | 7.4   | 5.2   | 7.5   | 9.9   | 72.6   | 25.2%              |
| Democratic Republic of the Congo | Yes | Africa                | 0.1  | 0.4  | 0.4   | 1.7  | 5.3  | 7.8  | 18.1 | 9.9   | 19.1 | 10.6  | 19.9  | 24.8  | 34.2  | 30.5  | 28.7  | 211.5  | 47.5%              |
| Eritrea                          | Yes | Africa                | 39.8 | 41.5 | 43.7  | 34.7 | 21.1 | 11.1 | 8.6  | 6.6   | 18.6 | 27.5  | 31.7  | 34.3  | 16.9  | 16.3  | 12.6  | 365.1  | -7.9%              |
| Iraq                             | No  | Eastern Mediterranean | 17.6 | 4.1  | 3.9   | 1.3  | 1.2  | 16.3 | 1.7  | 0.1   | 0.4  | 5.5   | 1.8   | 4.9   | 4.0   | 5.8   | 4.5   | 72.9   | -9.4%              |
| Liberia                          | Yes | Africa                | 0.6  | 3.0  | 2.3   | 1.8  | 14.6 | 26.1 | 98.1 | 137.7 | 88.7 | 139.4 | 125.8 | 196.6 | 112.3 | 68.3  | 68.1  | 1083.2 | 40.7%              |
| Libya                            | No  | Eastern Mediterranean |      |      |       |      |      |      |      |       | 1.7  | 0.3   | 0.1   | 0.0   | 0.1   | 0.1   | 9.9   | 12.1   | 34.3%              |
| Myanmar                          | No  | South-East Asia       | 0.0  |      |       | 1.3  | -0.4 | 6.2  | 2.3  | 4.1   | 5.6  | 34.3  | 37.8  | 63.5  | 27.2  | 48.2  | 45.4  | 275.6  | 38.4%              |
| Nepal                            | No  | South-East Asia       | 3.5  | 1.9  | 2.2   | 11.6 | 6.4  | 24.4 | 19.9 | 38.1  | 24.0 | 34.8  | 65.8  | 62.3  | 74.7  | 68.5  | 105.2 | 543.4  | 27.5%              |
| Nigeria                          | Yes | Africa                | 1.1  | 0.6  | 0.7   | 0.8  | 3.8  | 3.3  | 19.5 | 2.9   | 7.7  | 16.0  | 20.8  | 12.6  | 23.5  | 20.9  | 19.4  | 153.5  | 22.9%              |
| Pakistan                         | No  | Eastern Mediterranean | 0.0  | 0.1  | 1.8   | 0.3  | 4.3  | 11.8 | 7.5  | 14.6  | 8.4  | 22.9  | 30.3  | 13.3  | 23.9  | 16.7  | 17.5  | 173.4  | 55.8%              |
| Sierra Leone                     | Yes | Africa                | 2.8  | 0.7  | 4.7   | 9.0  | 13.1 | 21.2 | 23.5 | 32.3  | 41.1 | 50.1  | 97.3  | 72.6  | 104.4 | 162.1 | 97.0  | 731.9  | 28.8%              |
| Somalia                          | Yes | Africa                | 1.4  | 1.7  | 1.0   | 3.8  | 2.7  | 6.4  | 8.8  | 10.0  | 15.1 | 42.6  | 23.2  | 34.5  | 21.6  | 21.6  | 35.3  | 229.7  | 25.9%              |
| South Sudan                      | Yes | Africa                |      |      |       |      |      |      |      |       | 44.0 | 122.4 | 138.3 | 80.1  | 152.1 | 86.0  | 137.3 | 760.1  | 20.9%              |
| Sri Lanka                        | No  | South-East Asia       | 10.2 | 12.5 | 4.5   | 2.4  | 10.3 | 7.9  | 16.7 | 8.0   | 13.9 | 13.0  | 10.8  | 8.8   | 23.2  | 25.9  | 23.1  | 191.2  | 6.0%               |
| Sudan                            | Yes | Africa                | 0.2  | 3.8  | 4.2   | 3.0  | 7.0  | 10.4 | 15.5 | 40.2  | 22.7 | 34.3  | 33.3  | 24.6  | 26.3  | 14.4  | 11.9  | 251.9  | 33.9%              |
| Syrian Arab Republic             | No  | Eastern Mediterranean |      |      |       | 0.3  | 0.6  | 0.0  | 0.5  | 0.6   | 0.1  | 1.2   | 3.7   | 15.0  | 5.7   | 18.9  | 42.7  | 89.2   | 58.3%              |
| Timor-Leste                      | No  | South-East Asia       |      | 2.6  | 10.3  | 24.0 | 10.3 | 34.3 | 63.0 | 86.4  | 81.8 | 99.9  | 80.4  | 47.3  | 97.4  | 120.0 | 60.3  | 818.0  | 27.4%              |
| Uganda                           | Yes | Africa                | 0.1  | 0.1  | 100.1 | 4.5  | 38.8 | 7.6  | 20.2 | 15.1  | 14.7 | 43.4  | 21.7  | 20.4  | 22.4  | 26.6  | 30.4  | 366.0  | 49.1%              |
| Ukraine                          | No  | Europe                |      |      | 1.1   | 2.1  | 1.2  | 0.3  | 2.1  | 3.2   | 2.6  | 5.1   | 2.0   | 2.3   | 1.5   | 1.6   | 1.5   | 26.6   | 2.4%               |
| Yemen                            | No  | Eastern Mediterranean | 0.1  | 0.0  | 4.2   | 4.3  | 11.0 | 14.0 | 11.5 | 17.8  | 19.1 | 26.9  | 40.3  | 60.2  | 19.7  | 20.1  | 27.6  | 276.6  | 52.7%              |

**Note:**

1. We estimated the number of births using the total population multiplied by crude birth rate. See <http://adph.org/healthstats/assets/Formulas.pdf>.
2. If SSA is “Yes”, the country is a Sub-Saharan African country; If SSA is “No”, the country is not a Sub-Saharan African country.
3. Annual growth rate= $((\text{end value}/\text{start value})^{1/\text{periods}}) - 1$ .

**Appendix Table 20. Lower bound of development assistance for child health per child aged one month to nine years old by recipient country, 2003-2017 (SUS)**

| Country                          | SSA | Region                | 2003 | 2004 | 2005 | 2006 | 2007 | 2008 | 2009 | 2010 | 2011 | 2012 | 2013 | 2014 | 2015 | 2016 | 2017 | Total | Annual growth rate |
|----------------------------------|-----|-----------------------|------|------|------|------|------|------|------|------|------|------|------|------|------|------|------|-------|--------------------|
| Afghanistan                      | No  | Eastern Mediterranean | 0.4  | 0.1  | 0.8  | 1.6  | 4.4  | 4.5  | 9.6  | 8.2  | 9.3  | 8.4  | 9.1  | 8.8  | 9.7  | 6.6  | 10.1 | 91.4  | 25.4%              |
| Angola                           | Yes | Africa                | 0.8  | 0.5  | 0.4  | 1.5  | 2.3  | 3.5  | 2.4  | 2.5  | 1.5  | 1.4  | 1.1  | 1.4  | 1.1  | 0.6  | 0.4  | 21.2  | -4.1%              |
| Burundi                          | Yes | Africa                | 2.8  | 2.9  | 5.2  | 3.4  | 4.8  | 3.0  | 7.9  | 5.2  | 5.1  | 5.4  | 4.7  | 3.9  | 4.5  | 8.6  | 3.2  | 70.4  | 1.1%               |
| Central African Republic         | Yes | Africa                | 0.3  | 0.6  | 2.1  | 4.5  | 3.5  | 5.3  | 2.1  | 2.6  | 4.5  | 4.9  | 4.7  | 9.3  | 14.6 | 15.8 | 6.5  | 81.3  | 23.9%              |
| Chad                             | Yes | Africa                | 1.3  | 1.1  | 1.9  | 0.8  | 2.3  | 1.4  | 2.2  | 5.2  | 2.8  | 3.9  | 3.8  | 6.1  | 3.5  | 2.7  | 3.2  | 42.1  | 6.9%               |
| Colombia                         | No  | Americas              | 0.1  | 0.1  | 0.1  | 0.3  | 0.5  | 0.9  | 0.6  | 0.6  | 0.5  | 0.6  | 0.8  | 0.9  | 1.1  | 0.3  | 0.2  | 7.6   | 3.8%               |
| Democratic Republic of the Congo | Yes | Africa                | 0.6  | 0.7  | 1.5  | 1.4  | 1.4  | 2.3  | 3.3  | 3.5  | 4.2  | 3.6  | 4.6  | 5.9  | 6.7  | 5.4  | 7.7  | 52.9  | 19.7%              |
| Eritrea                          | Yes | Africa                | 6.8  | 5.4  | 4.7  | 6.4  | 2.1  | 2.1  | 5.9  | 21.7 | 8.3  | 11.0 | 15.0 | 7.9  | 1.6  | 1.9  | 0.9  | 101.6 | -13.5%             |
| Iraq                             | No  | Eastern Mediterranean | 3.4  | 0.3  | 0.0  | 0.6  | 0.2  | 0.1  | 1.6  | 0.7  | 0.3  | 0.9  | 0.4  | 2.5  | 1.6  | 3.0  | 2.5  | 18.0  | -2.2%              |
| Liberia                          | Yes | Africa                | 0.3  | 2.5  | 0.6  | 3.7  | 5.5  | 6.8  | 13.9 | 14.4 | 11.2 | 9.8  | 12.3 | 14.3 | 14.9 | 7.1  | 8.6  | 125.9 | 26.2%              |
| Libya                            | No  | Eastern Mediterranean |      |      |      |      |      | 0.1  |      | 0.0  | 0.7  | 1.7  | 0.2  | 0.4  | 0.8  | 0.9  | 3.3  | 8.0   | 53.6%              |
| Myanmar                          | No  | South-East Asia       | 0.3  | 0.3  | 0.4  | 0.4  | 0.7  | 1.1  | 0.6  | 0.9  | 1.3  | 4.3  | 4.2  | 5.7  | 5.1  | 4.8  | 3.4  | 33.5  | 17.9%              |
| Nepal                            | No  | South-East Asia       | 0.6  | 0.4  | 0.5  | 0.5  | 1.8  | 1.3  | 1.3  | 2.5  | 2.7  | 2.5  | 5.9  | 13.3 | 9.1  | 6.0  | 8.1  | 56.6  | 20.0%              |
| Nigeria                          | Yes | Africa                | 0.4  | 0.4  | 0.3  | 0.4  | 1.0  | 1.0  | 3.1  | 1.2  | 1.9  | 3.3  | 3.3  | 5.0  | 3.7  | 3.5  | 4.0  | 32.3  | 18.2%              |
| Pakistan                         | No  | Eastern Mediterranean | 0.6  | 0.1  | 0.8  | 1.6  | 1.2  | 0.9  | 1.5  | 2.6  | 1.1  | 2.9  | 2.8  | 2.1  | 4.1  | 3.1  | 3.8  | 29.1  | 13.7%              |
| Sierra Leone                     | Yes | Africa                | 0.7  | 1.1  | 0.9  | 2.3  | 3.2  | 1.9  | 7.5  | 6.9  | 9.0  | 8.9  | 11.4 | 20.5 | 23.7 | 18.5 | 12.8 | 129.2 | 22.8%              |
| Somalia                          | Yes | Africa                | 0.7  | 0.5  | 0.6  | 0.7  | 1.3  | 3.8  | 4.3  | 5.5  | 6.5  | 6.6  | 9.6  | 10.2 | 10.1 | 6.2  | 9.4  | 76.0  | 20.1%              |
| South Sudan                      | Yes | Africa                |      |      |      |      |      |      |      |      | 5.4  | 10.0 | 11.7 | 12.3 | 15.6 | 22.2 | 22.9 | 100.0 | 27.3%              |
| Sri Lanka                        | No  | South-East Asia       | 0.9  | 1.8  | 0.6  | 0.5  | 1.8  | 0.5  | 2.8  | 1.8  | 1.4  | 1.6  | 0.8  | 0.7  | 0.5  | 0.3  | 0.6  | 16.6  | -3.2%              |
| Sudan                            | Yes | Africa                | 0.6  | 1.8  | 5.5  | 1.7  | 3.4  | 3.2  | 4.7  | 5.5  | 3.3  | 2.0  | 4.3  | 2.4  | 2.4  | 1.9  | 2.4  | 45.1  | 9.9%               |
| Syrian Arab Republic             | No  | Eastern Mediterranean | 0.1  | 0.0  | 0.0  | 0.0  | 0.1  | 0.0  | 0.1  | 0.1  | 0.1  | 0.5  | 6.0  | 6.5  | 6.3  | 12.5 | 16.8 | 49.2  | 47.7%              |
| Timor-Leste                      | No  | South-East Asia       | 3.8  | 1.2  | 1.2  | 3.6  | 3.5  | 9.6  | 10.1 | 10.1 | 8.9  | 8.4  | 7.3  | 21.4 | 13.1 | 33.6 | 10.4 | 146.2 | 7.4%               |
| Uganda                           | Yes | Africa                | 1.2  | 1.3  | 0.8  | 2.0  | 3.7  | 1.9  | 3.8  | 2.8  | 3.6  | 7.1  | 5.4  | 6.7  | 6.2  | 7.3  | 6.0  | 59.6  | 12.4%              |
| Ukraine                          | No  | Europe                |      |      | 0.6  | 1.5  | 1.4  | 0.8  | 0.6  | 0.5  | 0.4  | 0.8  | 0.4  | 1.5  | 2.3  | 1.1  | 1.4  | 13.3  | 7.6%               |
| Yemen                            | No  | Eastern Mediterranean | 1.1  | 0.9  | 2.6  | 0.8  | 1.0  | 0.9  | 0.8  | 2.2  | 2.9  | 4.9  | 11.7 | 9.0  | 7.7  | 11.8 | 11.9 | 70.1  | 18.9%              |

**Note:**

1. If SSA is “Yes”, the country is a Sub-Saharan African country; If SSA is “No”, the country is not a Sub-Saharan African country.
2. Annual growth rate= $((\text{end value}/\text{start value})^{1/\text{periods}}) - 1$ .



**Appendix Table 21. Lower bound of development assistance for adolescent health per adolescent aged 10-24 years old by recipient country, 2003-2017 (\$US)**

| Country                          | SSA | Region                | 2003 | 2004 | 2005 | 2006 | 2007 | 2008 | 2009 | 2010 | 2011 | 2012 | 2013 | 2014 | 2015 | 2016 | 2017 | Total | Annual growth rate |
|----------------------------------|-----|-----------------------|------|------|------|------|------|------|------|------|------|------|------|------|------|------|------|-------|--------------------|
| Afghanistan                      | No  | Eastern Mediterranean |      | 0.0  | 0.0  | 0.0  | 0.0  | 0.9  | 2.3  | 0.8  | 0.6  | 0.2  | 0.1  | 1.1  | 1.4  | 0.2  | 0.1  | 7.7   | 55.7%              |
| Angola                           | Yes | Africa                | 0.0  | 0.1  | 0.0  | 0.0  | 0.0  | 0.0  | 0.0  | 0.0  | 0.0  | 0.0  | 0.0  | 0.0  | 0.0  | 0.0  | 0.1  | 0.3   | -23.6%             |
| Burundi                          | Yes | Africa                | 0.6  | 0.6  | 1.3  | 0.3  | 0.0  | 0.1  | 0.3  | 0.4  | 0.3  | 0.3  | 0.1  | 0.6  | 0.2  | 0.7  | 0.8  | 6.5   | 0.9%               |
| Central African Republic         | Yes | Africa                |      |      |      |      |      |      |      | 0.0  | 0.0  | 0.0  | 0.0  |      | 0.0  | 0.0  | 0.5  | 0.6   | -0.8%              |
| Chad                             | Yes | Africa                |      | 0.1  | 0.4  | 0.3  | 0.0  |      | 0.0  | 0.4  | 0.6  | 0.0  |      |      | 0.0  | 0.1  | 0.3  | 2.2   | -0.9%              |
| Colombia                         | No  | Americas              | 0.0  | 0.1  | 0.0  | 0.0  | 0.2  | 0.3  | 0.3  | 0.2  | 0.3  | 0.2  | 0.3  | 0.2  | 0.4  | 0.1  | 0.2  | 2.7   | 6.3%               |
| Democratic Republic of the Congo | Yes | Africa                | 0.1  | 0.2  | 0.1  | 0.1  | 0.1  | 0.2  | 0.2  | 0.2  | 0.1  | 0.1  | 0.0  | 0.2  | 0.2  | 0.1  | 0.2  | 1.8   | 3.8%               |
| Eritrea                          | Yes | Africa                | 2.0  | 2.3  | 2.9  | 1.7  | 0.1  | 0.0  | 4.0  | 4.8  | 0.0  | 4.8  | 3.4  | 0.6  | 0.3  |      | 0.5  | 27.4  | -13.5%             |
| Iraq                             | No  | Eastern Mediterranean | 0.0  |      |      |      | 0.0  | 0.0  | 0.1  | 0.0  | 0.0  | 0.0  |      | 0.1  | 0.2  | 0.2  | 0.4  | 0.9   | 31.8%              |
| Liberia                          | Yes | Africa                |      | 0.0  | 0.2  | 0.4  | 0.3  | 2.2  | 3.5  | 0.8  | 2.0  | 0.2  | 0.0  | 0.8  | 1.6  | 0.4  | 1.1  | 13.4  | 29.7%              |
| Libya                            | No  | Eastern Mediterranean |      |      |      |      |      |      |      |      | 1.0  |      |      |      |      |      | 0.1  | 1.0   |                    |
| Myanmar                          | No  | South-East Asia       | 0.0  |      |      | 0.0  | 0.0  | 0.0  | 0.0  | 0.0  | 0.0  | 0.2  | 0.3  | 0.4  | 0.0  | 0.5  | 0.1  | 1.5   | 35.3%              |
| Nepal                            | No  | South-East Asia       | 0.0  | 0.0  | 0.0  | 0.0  | 0.0  | 0.2  | 0.6  | 0.1  | 0.1  | 0.1  | 0.1  | 0.3  | 0.3  | 0.6  | 0.3  | 2.9   | 33.1%              |
| Nigeria                          | Yes | Africa                | 0.0  |      | 0.0  | 0.0  | 0.0  | 0.0  | 0.1  | 0.0  | 0.0  | 0.0  | 0.0  | 0.0  | 0.0  | 0.1  | 0.1  | 0.3   | 8.6%               |
| Pakistan                         | No  | Eastern Mediterranean | 0.0  | 0.0  |      | 0.0  | 0.0  | 0.0  | 0.2  | 0.2  | 0.1  | 0.1  | 0.1  | 0.1  | 0.1  | 0.0  | 0.2  | 1.1   | 13.8%              |
| Sierra Leone                     | Yes | Africa                |      |      |      | 0.0  | 0.4  | 0.3  | 0.2  | 2.5  | 2.1  | 0.8  | 1.1  | 1.7  | 1.6  | 1.1  | 0.4  | 12.1  | 67.6%              |
| Somalia                          | Yes | Africa                |      |      |      |      | 0.0  | 0.0  | 0.1  | 0.1  | 0.1  | 0.2  | 0.0  | 0.0  | 0.0  | 0.1  | 0.1  | 0.7   | 13.8%              |
| South Sudan                      | Yes | Africa                |      |      |      |      |      |      |      |      | 0.0  | 0.0  | 0.5  | 0.0  | 0.0  | 0.0  | 0.2  | 0.7   | -33.1%             |
| Sri Lanka                        | No  | South-East Asia       | 0.2  | 0.3  | 0.2  | 0.5  | 0.4  | 0.2  | 0.7  | 0.8  | 2.0  | 2.1  | 1.7  | 0.1  | 0.0  | 0.1  | 0.1  | 9.3   | -7.5%              |
| Sudan                            | Yes | Africa                | 0.0  |      | 0.0  |      | 0.0  | 0.2  | 0.2  | 0.0  | 0.0  | 0.0  | 0.0  | 0.0  | 0.0  | 0.0  | 0.3  | 0.8   | 23.5%              |
| Syrian Arab Republic             | No  | Eastern Mediterranean |      |      |      | 0.0  | 0.0  |      | 0.0  | 0.0  | 0.0  | 0.0  | 0.0  | 0.0  | 0.0  | 0.3  | 0.8  | 1.1   | 90.3%              |
| Timor-Leste                      | No  | South-East Asia       | 0.0  |      | 2.4  | 4.3  | 0.1  | 1.9  | 1.1  | 4.1  | 5.8  | 0.1  | -0.1 | 3.8  | 4.1  | 3.8  | 4.4  | 35.8  | 3.7%               |
| Uganda                           | Yes | Africa                | 0.0  | 0.0  | 0.3  | 0.5  | 0.3  | 0.2  | 0.3  | 0.0  | 0.1  | 0.1  | 0.4  | 0.6  | 0.8  | 0.2  | 0.3  | 4.0   | 15.9%              |
| Ukraine                          | No  | Europe                |      |      | 0.4  | 0.4  | 0.5  | 0.6  | 0.7  | 0.1  | 0.1  | 0.0  | 0.0  | 0.0  | 0.0  | 0.1  | 0.2  | 2.9   | -16.0%             |
| Yemen                            | No  | Eastern Mediterranean |      |      |      |      | 0.1  | 0.1  | 0.2  | 0.1  | 0.0  | 0.0  | 0.0  | 0.2  | 0.0  | 0.0  | 0.1  | 0.6   | -38.7%             |

**Note:**

1. If SSA is “Yes”, the country is a Sub-Saharan African country; If SSA is “No”, the country is not a Sub-Saharan African country.
2. Annual growth rate= $((\text{end value}/\text{start value})^{1/\text{periods}}) - 1$ .

Appendix Table 22. Upper bound of development assistance for reproductive health per person aged 15-49 years old by recipient country, 2003-2017 (\$US)

| Country                          | SSA | Region                | 2003 | 2004 | 2005 | 2006 | 2007 | 2008 | 2009 | 2010 | 2011 | 2012 | 2013 | 2014 | 2015 | 2016 | 2017 | Total | Annual growth rate |
|----------------------------------|-----|-----------------------|------|------|------|------|------|------|------|------|------|------|------|------|------|------|------|-------|--------------------|
| Afghanistan                      | No  | Eastern Mediterranean | 0.7  | 0.7  | 1.2  | 1.3  | 1.4  | 1.8  | 3.6  | 2.4  | 2.3  | 3.2  | 2.4  | 2.0  | 1.7  | 1.3  | 1.8  | 27.7  | 7.1%               |
| Angola                           | Yes | Africa                | 1.0  | 1.3  | 2.0  | 1.6  | 1.3  | 1.8  | 1.3  | 1.6  | 1.2  | 1.1  | 1.5  | 0.8  | 0.9  | 1.3  | 1.4  | 20.0  | 2.2%               |
| Burundi                          | Yes | Africa                | 1.1  | 1.7  | 2.3  | 3.0  | 1.9  | 2.7  | 4.6  | 3.5  | 4.9  | 3.6  | 3.5  | 3.8  | 3.7  | 3.8  | 4.3  | 48.4  | 10.2%              |
| Central African Republic         | Yes | Africa                | 1.6  | 2.1  | 2.0  | 2.7  | 1.1  | 4.3  | 1.7  | 2.9  | 2.6  | 1.8  | 1.4  | 2.2  | 2.3  | 1.9  | 1.5  | 32.0  | -0.4%              |
| Chad                             | Yes | Africa                | 1.1  | 1.0  | 1.7  | 1.3  | 0.8  | 1.3  | 2.2  | 1.7  | 2.1  | 1.1  | 1.5  | 1.1  | 0.9  | 0.4  | 0.7  | 18.8  | -3.4%              |
| Colombia                         | No  | Americas              | 0.3  | 0.4  | 0.4  | 0.5  | 0.2  | 0.2  | 0.5  | 0.3  | 0.9  | 0.4  | 1.6  | 2.4  | 0.2  | 0.2  | 0.1  | 8.5   | -4.7%              |
| Democratic Republic of the Congo | Yes | Africa                | 0.6  | 0.7  | 1.2  | 1.2  | 1.2  | 1.8  | 1.4  | 2.4  | 2.0  | 2.6  | 2.2  | 1.7  | 2.3  | 2.6  | 2.8  | 26.7  | 11.0%              |
| Eritrea                          | Yes | Africa                | 5.2  | 6.2  | 7.7  | 3.1  | 4.3  | 4.9  | 2.4  | 2.6  | 1.4  | 1.2  | 0.9  | 3.9  | 1.0  | 1.9  | 0.5  | 47.0  | -16.0%             |
| Iraq                             | No  | Eastern Mediterranean | 0.2  | 0.5  | 2.9  | 2.2  | 1.3  | 0.3  | 0.4  | 0.4  | 0.2  | 0.1  | 0.2  | 0.6  | 0.3  | 3.3  | 0.7  | 13.5  | 9.4%               |
| Liberia                          | Yes | Africa                | 0.9  | 1.4  | 2.6  | 2.3  | 3.7  | 5.1  | 5.7  | 7.7  | 7.0  | 5.7  | 4.2  | 3.9  | 3.8  | 4.7  | 4.8  | 63.5  | 13.2%              |
| Libya                            | No  | Eastern Mediterranean |      |      | 0.1  | 0.1  | 0.2  | 0.9  | 0.7  | 0.1  | 0.6  | 0.1  | 0.3  | 0.0  | 0.2  | 0.3  | 0.5  | 4.1   | 11.0%              |
| Myanmar                          | No  | South-East Asia       | 0.4  | 0.4  | 0.6  | 0.3  | 0.5  | 0.6  | 0.6  | 1.1  | 0.9  | 0.8  | 1.4  | 1.1  | 1.3  | 1.7  | 0.9  | 12.3  | 6.8%               |
| Nepal                            | No  | South-East Asia       | 1.3  | 1.3  | 1.6  | 1.9  | 1.4  | 1.4  | 1.4  | 1.9  | 1.7  | 1.5  | 2.0  | 1.8  | 2.0  | 1.1  | 0.7  | 23.0  | -4.1%              |
| Nigeria                          | Yes | Africa                | 0.5  | 0.8  | 1.0  | 1.5  | 1.9  | 2.9  | 2.8  | 3.0  | 2.6  | 2.8  | 3.6  | 3.0  | 2.3  | 2.1  | 1.7  | 32.6  | 8.6%               |
| Pakistan                         | No  | Eastern Mediterranean | 0.3  | 0.3  | 0.3  | 0.2  | 0.7  | 0.2  | 0.3  | 0.4  | 0.2  | 0.3  | 0.4  | 0.4  | 0.6  | 0.4  | 0.3  | 5.3   | 1.5%               |
| Sierra Leone                     | Yes | Africa                | 1.4  | 1.5  | 2.6  | 1.9  | 2.3  | 2.8  | 4.3  | 5.1  | 4.6  | 4.9  | 3.2  | 4.4  | 3.2  | 5.8  | 5.6  | 53.6  | 10.4%              |
| Somalia                          | Yes | Africa                | 0.4  | 0.2  | 0.7  | 0.8  | 1.2  | 0.6  | 0.7  | 1.3  | 1.6  | 1.6  | 1.5  | 1.6  | 0.9  | 1.7  | 1.6  | 16.4  | 11.3%              |
| South Sudan                      | Yes | Africa                |      |      |      |      |      |      |      | 1.4  | 2.3  | 2.9  | 5.2  | 3.9  | 2.1  | 3.8  | 21.6 | 17.8% |                    |
| Sri Lanka                        | No  | South-East Asia       | 0.2  | 0.1  | 0.3  | 0.5  | 0.4  | 0.4  | 0.6  | 0.7  | 0.6  | 0.4  | 0.5  | 0.3  | 0.6  | 0.3  | 0.5  | 6.3   | 8.1%               |
| Sudan                            | Yes | Africa                | 0.2  | 0.2  | 0.6  | 1.1  | 0.8  | 1.3  | 1.6  | 1.7  | 1.5  | 0.7  | 0.5  | 0.6  | 0.6  | 0.7  | 0.5  | 12.4  | 6.6%               |
| Syrian Arab Republic             | No  | Eastern Mediterranean | 0.2  | 0.1  | 0.3  | 0.2  | 0.2  | 0.3  | 0.4  | 0.2  | 0.2  | 0.2  | 0.7  | 0.6  | 0.8  | 1.1  | 2.9  | 8.1   | 21.8%              |
| Timor-Leste                      | No  | South-East Asia       | 2.4  | 1.7  | 1.7  | 3.7  | 4.7  | 5.1  | 8.2  | 11.0 | 8.1  | 7.9  | 6.6  | 9.1  | 4.8  | 2.6  | 2.9  | 80.4  | 1.3%               |
| Uganda                           | Yes | Africa                | 3.4  | 6.4  | 5.6  | 6.1  | 8.1  | 8.1  | 14.5 | 9.2  | 9.1  | 10.4 | 10.3 | 9.0  | 8.7  | 10.6 | 9.5  | 128.9 | 7.6%               |
| Ukraine                          | No  | Europe                |      |      | 0.6  | 1.0  | 1.3  | 1.1  | 1.4  | 1.0  | 1.1  | 1.5  | 1.4  | 1.2  | 1.9  | 2.0  | 1.3  | 16.8  | 7.0%               |
| Yemen                            | No  | Eastern Mediterranean | 0.4  | 0.3  | 1.0  | 0.7  | 0.5  | 0.6  | 0.5  | 0.8  | 0.6  | 0.8  | 0.9  | 1.0  | 1.0  | 0.7  | 1.6  | 11.3  | 11.4%              |

**Note:**

1. If SSA is “Yes”, the country is a Sub-Saharan African country; If SSA is “No”, the country is not a Sub-Saharan African country.
2. Annual growth rate= $((\text{end value}/\text{start value})^{1/\text{periods}}) - 1$ .

Appendix Table 23. Upper bound of development assistance for maternal and newborn health per birth by recipient country, 2003-2017 (\$US)

| Country                          | SSA | Region                | 2003 | 2004 | 2005 | 2006 | 2007  | 2008 | 2009  | 2010  | 2011  | 2012  | 2013  | 2014  | 2015  | 2016  | 2017  | Total  | Annual growth rate |
|----------------------------------|-----|-----------------------|------|------|------|------|-------|------|-------|-------|-------|-------|-------|-------|-------|-------|-------|--------|--------------------|
| Afghanistan                      | No  | Eastern Mediterranean | 11.0 | 12.5 | 15.5 | 20.7 | 30.2  | 38.0 | 50.1  | 63.9  | 74.8  | 63.7  | 82.6  | 84.9  | 95.1  | 74.5  | 55.8  | 773.3  | 12.3%              |
| Angola                           | Yes | Africa                | 5.6  | 4.7  | 7.0  | 4.7  | 8.8   | 13.9 | 11.4  | 11.8  | 6.8   | 13.2  | 10.0  | 9.9   | 11.1  | 6.8   | 8.5   | 134.2  | 3.1%               |
| Burundi                          | Yes | Africa                | 10.2 | 12.7 | 21.3 | 10.8 | 18.4  | 21.6 | 24.8  | 30.6  | 42.5  | 28.6  | 32.4  | 32.6  | 30.6  | 63.4  | 36.4  | 416.8  | 9.5%               |
| Central African Republic         | Yes | Africa                | 2.7  | 7.5  | 4.4  | 2.5  | 3.9   | 15.8 | 12.4  | 19.7  | 18.7  | 16.1  | 33.5  | 49.4  | 45.2  | 88.0  | 55.2  | 374.9  | 24.1%              |
| Chad                             | Yes | Africa                | 24.0 | 29.8 | 23.7 | 11.3 | 6.2   | 10.2 | 8.7   | 30.4  | 18.7  | 15.7  | 18.7  | 18.2  | -9.1  | 27.8  | 23.3  | 257.5  | -0.2%              |
| Colombia                         | No  | Americas              | 12.4 | 10.0 | 9.2  | 9.3  | 4.2   | 5.1  | 6.4   | 14.2  | 19.0  | 11.1  | 41.1  | 80.6  | 6.3   | 8.5   | 12.4  | 249.7  | -0.1%              |
| Democratic Republic of the Congo | Yes | Africa                | 2.2  | 3.1  | 3.6  | 5.0  | 8.7   | 15.0 | 25.9  | 18.7  | 27.4  | 21.9  | 30.1  | 37.2  | 46.7  | 40.8  | 37.8  | 324.2  | 22.5%              |
| Eritrea                          | Yes | Africa                | 49.9 | 47.7 | 45.1 | 38.4 | 25.8  | 16.0 | 10.0  | 9.3   | 21.6  | 28.5  | 35.5  | 40.0  | 23.7  | 23.3  | 29.4  | 444.3  | -3.7%              |
| Iraq                             | No  | Eastern Mediterranean | 21.4 | 12.8 | 55.1 | 39.3 | 20.4  | 21.3 | 7.5   | 6.5   | 2.6   | 6.5   | 4.8   | 6.7   | 12.0  | 52.9  | 6.2   | 276.1  | -8.5%              |
| Liberia                          | Yes | Africa                | 6.9  | 11.7 | 9.7  | 11.7 | 20.5  | 47.4 | 129.2 | 151.3 | 104.9 | 170.1 | 154.7 | 270.6 | 275.6 | 113.4 | 101.1 | 1578.7 | 21.1%              |
| Libya                            | No  | Eastern Mediterranean |      |      | 0.1  |      | 0.0   | 15.2 | 8.9   | 0.1   | 7.2   | 1.7   | 2.2   | 0.4   | 4.5   | 5.9   | 19.5  | 65.6   | 50.7%              |
| Myanmar                          | No  | South-East Asia       | 1.2  | 0.9  | 1.2  | 2.6  | 1.0   | 8.2  | 6.7   | 9.4   | 9.4   | 41.8  | 47.4  | 75.7  | 38.0  | 63.6  | 58.3  | 365.2  | 32.4%              |
| Nepal                            | No  | South-East Asia       | 8.1  | 4.9  | 5.5  | 15.7 | -15.9 | 32.2 | 27.2  | 49.6  | 32.0  | 44.0  | 74.3  | 69.3  | 89.5  | 79.7  | 114.1 | 630.2  | 20.8%              |
| Nigeria                          | Yes | Africa                | 2.6  | 4.7  | 6.1  | 7.9  | 8.8   | 9.4  | 27.8  | 9.0   | 12.9  | 19.5  | 26.6  | 17.4  | 33.7  | 27.6  | 27.9  | 242.1  | 18.4%              |
| Pakistan                         | No  | Eastern Mediterranean | 0.8  | 3.0  | 3.9  | 2.8  | 7.7   | 14.5 | 12.3  | 19.8  | 11.4  | 26.6  | 34.6  | 16.4  | 26.8  | 21.5  | 22.8  | 224.9  | 26.6%              |
| Sierra Leone                     | Yes | Africa                | 8.9  | 8.2  | 13.3 | 16.2 | 20.6  | 31.4 | 32.9  | 43.6  | 48.8  | 56.2  | 106.1 | 112.9 | 166.5 | 202.6 | 132.6 | 1000.6 | 21.3%              |
| Somalia                          | Yes | Africa                | 2.4  | 4.8  | 3.6  | 6.9  | 6.0   | 10.3 | 19.1  | 13.5  | 14.4  | 45.4  | 30.6  | 51.8  | 39.5  | 37.2  | 49.4  | 334.8  | 24.1%              |
| South Sudan                      | Yes | Africa                |      |      |      |      |       |      |       |       | 42.1  | 129.6 | 140.2 | 111.6 | 198.9 | 114.3 | 177.1 | 913.8  | 27.0%              |
| Sri Lanka                        | No  | South-East Asia       | 11.7 | 13.8 | 7.5  | 12.0 | 15.3  | 14.9 | 26.5  | 21.8  | 16.5  | 18.8  | 16.0  | 20.2  | 38.2  | 36.3  | 45.1  | 314.6  | 10.1%              |
| Sudan                            | Yes | Africa                | 1.5  | 7.0  | 9.3  | 7.2  | 10.9  | 17.0 | 18.1  | 41.6  | 26.8  | 41.0  | 38.2  | 29.7  | 34.4  | 27.2  | 18.3  | 328.3  | 19.6%              |
| Syrian Arab Republic             | No  | Eastern Mediterranean | 0.3  | 0.9  | 3.2  | 2.1  | 2.8   | 3.5  | 5.3   | 4.0   | 2.8   | 3.5   | 17.9  | 45.3  | 46.1  | 36.5  | 49.6  | 223.7  | 43.0%              |
| Timor-Leste                      | No  | South-East Asia       | 9.9  | 20.6 | 35.4 | 62.3 | 47.3  | 72.6 | 87.3  | 105.4 | 103.0 | 135.5 | 101.3 | 67.4  | 123.4 | 148.3 | 81.3  | 1200.9 | 16.2%              |
| Uganda                           | Yes | Africa                | 7.8  | 6.9  | 59.4 | 12.8 | 28.6  | 13.3 | 24.9  | 21.2  | 22.2  | 50.6  | 28.3  | 30.1  | 32.4  | 39.1  | 40.8  | 418.3  | 12.6%              |
| Ukraine                          | No  | Europe                |      |      | 3.7  | 4.7  | 3.7   | 3.0  | 4.2   | 4.1   | 6.8   | 8.9   | 7.1   | 10.0  | 5.3   | 6.9   | 9.9   | 78.4   | 8.7%               |
| Yemen                            | No  | Eastern Mediterranean | 5.3  | 4.1  | 10.9 | 6.3  | 11.9  | 16.5 | 13.3  | 19.4  | 21.7  | 28.6  | 42.7  | 62.5  | 33.7  | 26.4  | 72.7  | 375.9  | 20.5%              |

**Note:**

1. We estimate the number of births using the total population multiplied by crude birth rate. See <http://adph.org/healthstats/assets/Formulas.pdf>.
2. If SSA is “Yes”, the country is a Sub-Saharan African country; If SSA is “No”, the country is not a Sub-Saharan African country.
3. Annual growth rate= $((\text{end value}/\text{start value})^{1/\text{periods}}) - 1$ .

Appendix Table 24. Upper bound of development assistance for child health per child aged one month to nine years old by recipient country, 2003-2017 (\$US)

| Country                          | SSA | Region                | 2003 | 2004 | 2005 | 2006 | 2007 | 2008 | 2009 | 2010 | 2011 | 2012 | 2013 | 2014 | 2015 | 2016 | 2017 | Total | Annual growth rate |
|----------------------------------|-----|-----------------------|------|------|------|------|------|------|------|------|------|------|------|------|------|------|------|-------|--------------------|
| Afghanistan                      | No  | Eastern Mediterranean | 1.7  | 3.2  | 5.2  | 6.1  | 10.7 | 9.8  | 16.5 | 18.2 | 17.7 | 13.2 | 15.6 | 15.6 | 15.1 | 12.2 | 16.9 | 177.7 | 17.7%              |
| Angola                           | Yes | Africa                | 1.9  | 1.6  | 2.9  | 2.5  | 3.8  | 5.0  | 3.4  | 3.6  | 2.4  | 3.3  | 3.3  | 2.6  | 2.4  | 1.8  | 1.8  | 42.3  | -0.7%              |
| Burundi                          | Yes | Africa                | 4.0  | 4.4  | 6.9  | 4.9  | 6.4  | 7.0  | 9.6  | 11.3 | 9.6  | 9.0  | 9.3  | 8.4  | 8.7  | 14.3 | 10.6 | 124.3 | 7.2%               |
| Central African Republic         | Yes | Africa                | 1.3  | 3.3  | 3.7  | 5.2  | 4.1  | 6.8  | 3.7  | 6.7  | 9.4  | 7.8  | 12.0 | 24.1 | 21.2 | 26.0 | 18.5 | 153.6 | 21.2%              |
| Chad                             | Yes | Africa                | 2.6  | 2.6  | 3.2  | 1.7  | 3.1  | 2.6  | 3.6  | 6.9  | 3.9  | 5.4  | 8.3  | 9.0  | 5.5  | 6.7  | 5.9  | 71.0  | 6.1%               |
| Colombia                         | No  | Americas              | 9.8  | 10.3 | 4.5  | 1.9  | 0.6  | 2.9  | 2.8  | 22.2 | 9.7  | 1.9  | 10.3 | 20.4 | 1.8  | 0.8  | 1.2  | 101.2 | -13.7%             |
| Democratic Republic of the Congo | Yes | Africa                | 1.4  | 1.9  | 2.9  | 2.6  | 2.7  | 5.0  | 5.8  | 6.6  | 7.2  | 7.7  | 8.9  | 10.4 | 11.0 | 9.0  | 10.9 | 93.8  | 15.9%              |
| Eritrea                          | Yes | Africa                | 10.1 | 7.7  | 5.2  | 7.3  | 3.6  | 3.7  | 6.4  | 22.6 | 9.6  | 12.1 | 16.1 | 10.0 | 4.0  | 4.0  | 5.8  | 128.1 | -3.9%              |
| Iraq                             | No  | Eastern Mediterranean | 4.8  | 2.9  | 14.8 | 11.6 | 7.1  | 1.7  | 3.5  | 3.0  | 1.0  | 1.2  | 1.4  | 3.9  | 4.3  | 18.9 | 4.2  | 84.1  | -1.0%              |
| Liberia                          | Yes | Africa                | 2.6  | 5.8  | 3.6  | 7.0  | 7.5  | 13.7 | 23.4 | 28.6 | 23.4 | 23.9 | 22.8 | 39.5 | 64.6 | 21.1 | 19.4 | 306.8 | 15.6%              |
| Libya                            | No  | Eastern Mediterranean |      |      | 0.0  |      | 0.0  | 4.5  | 2.6  | 0.0  | 2.3  | 2.1  | 0.8  | 1.3  | 2.5  | 4.3  | 7.2  | 27.5  | 54.0%              |
| Myanmar                          | No  | South-East Asia       | 0.7  | 0.5  | 0.7  | 0.8  | 1.0  | 1.7  | 1.8  | 2.4  | 2.2  | 6.2  | 6.7  | 8.9  | 8.1  | 9.2  | 7.3  | 58.3  | 18.5%              |
| Nepal                            | No  | South-East Asia       | 1.9  | 1.6  | 1.7  | 2.0  | 3.2  | 3.4  | 3.2  | 5.4  | 5.1  | 5.3  | 8.3  | 15.3 | 12.7 | 9.4  | 10.7 | 89.2  | 13.1%              |
| Nigeria                          | Yes | Africa                | 0.8  | 1.5  | 1.6  | 2.0  | 2.2  | 2.1  | 4.8  | 2.7  | 3.9  | 4.9  | 6.1  | 5.8  | 7.4  | 5.5  | 6.7  | 57.7  | 16.2%              |
| Pakistan                         | No  | Eastern Mediterranean | 1.2  | 1.0  | 1.4  | 2.5  | 2.3  | 1.8  | 2.9  | 4.4  | 2.5  | 3.8  | 4.2  | 3.0  | 5.0  | 4.7  | 5.4  | 46.1  | 11.6%              |
| Sierra Leone                     | Yes | Africa                | 3.1  | 3.8  | 4.0  | 4.9  | 5.9  | 5.4  | 10.4 | 11.1 | 11.6 | 11.6 | 14.3 | 33.9 | 43.5 | 30.7 | 24.1 | 218.0 | 15.9%              |
| Somalia                          | Yes | Africa                | 1.1  | 1.7  | 1.6  | 1.8  | 2.5  | 5.2  | 5.9  | 6.5  | 7.4  | 11.6 | 12.6 | 16.0 | 14.5 | 10.2 | 15.0 | 113.6 | 20.7%              |
| South Sudan                      | Yes | Africa                |      |      |      |      |      |      |      |      | 7.8  | 17.2 | 18.8 | 25.0 | 28.7 | 28.2 | 34.4 | 159.9 | 28.2%              |
| Sri Lanka                        | No  | South-East Asia       | 1.4  | 2.3  | 1.5  | 3.2  | 3.1  | 2.5  | 6.2  | 4.9  | 3.4  | 3.1  | 3.1  | 4.5  | 4.6  | 3.0  | 6.2  | 53.0  | 11.5%              |
| Sudan                            | Yes | Africa                | 1.1  | 3.0  | 7.2  | 3.1  | 4.6  | 5.3  | 5.7  | 8.7  | 4.5  | 3.9  | 5.7  | 3.9  | 4.5  | 5.3  | 4.4  | 70.6  | 10.6%              |
| Syrian Arab Republic             | No  | Eastern Mediterranean | 0.2  | 0.3  | 1.0  | 0.5  | 0.7  | 1.0  | 1.5  | 1.1  | 0.8  | 1.1  | 18.0 | 14.9 | 15.4 | 14.3 | 25.5 | 96.1  | 43.3%              |
| Timor-Leste                      | No  | South-East Asia       | 6.8  | 6.6  | 8.7  | 15.4 | 15.1 | 21.9 | 18.0 | 16.2 | 15.7 | 21.2 | 13.8 | 27.6 | 21.0 | 42.1 | 19.4 | 269.2 | 7.8%               |
| Uganda                           | Yes | Africa                | 3.9  | 3.8  | 10.2 | 4.9  | 7.6  | 3.8  | 5.6  | 5.7  | 6.8  | 11.3 | 8.5  | 11.1 | 11.3 | 12.2 | 9.2  | 116.0 | 6.4%               |
| Ukraine                          | No  | Europe                |      |      | 1.3  | 2.3  | 2.1  | 1.7  | 1.4  | 0.8  | 1.6  | 1.8  | 1.8  | 19.9 | 19.7 | 3.0  | 3.6  | 61.0  | 9.3%               |
| Yemen                            | No  | Eastern Mediterranean | 1.1  | 1.0  | 2.7  | 1.4  | 1.8  | 1.6  | 1.4  | 2.9  | 3.7  | 6.1  | 13.3 | 10.2 | 12.5 | 15.6 | 26.0 | 101.3 | 25.7%              |

**Note:**

1. If SSA is “Yes”, the country is a Sub-Saharan African country; If SSA is “No”, the country is not a Sub-Saharan African country.
2. Annual growth rate= $((\text{end value}/\text{start value})^{1/\text{periods}}) - 1$ .

**Appendix Table 25. Upper bound of development assistance for adolescent health per adolescent aged 10-24 years old by recipient country, 2003-2017 (\$US)**

| Country                          | SSA | Region                | 2003 | 2004 | 2005 | 2006 | 2007 | 2008 | 2009 | 2010 | 2011 | 2012 | 2013 | 2014 | 2015 | 2016 | 2017 | Total | Annual growth rate |
|----------------------------------|-----|-----------------------|------|------|------|------|------|------|------|------|------|------|------|------|------|------|------|-------|--------------------|
| Afghanistan                      | No  | Eastern Mediterranean | 0.1  | 0.2  | 0.3  | 0.3  | 0.4  | 1.4  | 4.2  | 4.0  | 2.6  | 0.4  | 0.4  | 1.8  | 2.0  | 0.5  | 0.5  | 18.9  | 14.5%              |
| Angola                           | Yes | Africa                | 0.1  | 0.2  | 0.3  | 0.1  | 0.1  | 0.1  | 0.1  | 0.1  | 0.1  | 0.2  | 0.3  | 0.1  | 0.1  | 0.1  | 0.2  | 2.1   | 5.1%               |
| Burundi                          | Yes | Africa                | 0.7  | 0.8  | 1.3  | 0.4  | 0.1  | 0.4  | 0.6  | 0.7  | 0.4  | 0.6  | 0.4  | 1.0  | 0.6  | 1.4  | 1.3  | 10.6  | 5.2%               |
| Central African Republic         | Yes | Africa                | 0.1  | 0.2  | 0.1  | 0.1  | 0.0  | 0.1  | 0.1  | 0.1  | 0.1  | 0.2  | 0.3  | 0.4  | 0.5  | 0.6  | 1.1  | 4.0   | 22.9%              |
| Chad                             | Yes | Africa                | 0.1  | 0.2  | 0.5  | 0.4  | 0.1  | 0.1  | 0.1  | 0.4  | 0.4  | 0.1  | 0.3  | 0.2  | 0.2  | 0.3  | 0.4  | 3.7   | 10.0%              |
| Colombia                         | No  | Americas              | 0.2  | 0.2  | 0.1  | 0.1  | 0.2  | 1.5  | 1.5  | 0.5  | 0.6  | 0.4  | 0.8  | 1.3  | 0.8  | 0.4  | 0.7  | 9.3   | 9.3%               |
| Democratic Republic of the Congo | Yes | Africa                | 0.1  | 0.2  | 0.2  | 0.2  | 0.2  | 0.5  | 0.5  | 0.4  | 0.5  | 0.5  | 0.4  | 0.5  | 0.5  | 0.4  | 0.5  | 5.5   | 10.8%              |
| Eritrea                          | Yes | Africa                | 2.2  | 2.4  | 2.9  | 1.8  | 0.2  | 0.1  | 4.0  | 4.8  | 0.1  | 4.9  | 3.5  | 0.7  | 0.4  | 0.3  | 0.8  | 29.2  | -6.7%              |
| Iraq                             | No  | Eastern Mediterranean | 0.1  | 0.1  | 0.9  | 0.7  | 0.4  | 0.2  | 0.5  | 0.1  | 0.1  | 0.2  | 0.1  | 0.2  | 0.4  | 1.5  | 0.4  | 5.9   | 16.2%              |
| Liberia                          | Yes | Africa                | 0.2  | 0.2  | 0.4  | 0.6  | 0.5  | 2.7  | 4.2  | 2.3  | 3.0  | 2.0  | 2.6  | 5.3  | 6.7  | 1.6  | 2.3  | 34.4  | 20.9%              |
| Libya                            | No  | Eastern Mediterranean |      |      | 0.0  |      | 0.0  | 0.2  | 0.1  | 0.0  | 1.0  | 0.0  | 0.0  | 0.1  | 0.0  | 0.1  | 0.2  | 1.8   | 46.9%              |
| Myanmar                          | No  | South-East Asia       | 0.0  | 0.0  | 0.0  | 0.0  | 0.0  | 0.1  | 0.1  | 0.1  | 0.1  | 0.3  | 0.4  | 0.6  | 0.2  | 0.7  | 0.2  | 2.7   | 19.4%              |
| Nepal                            | No  | South-East Asia       | 0.1  | 0.1  | 0.1  | 0.1  | 0.1  | 0.4  | 0.7  | 0.3  | 0.3  | 0.3  | 0.2  | 0.4  | 0.5  | 0.6  | 0.4  | 4.6   | 11.8%              |
| Nigeria                          | Yes | Africa                | 0.0  | 0.1  | 0.1  | 0.1  | 0.1  | 0.1  | 0.2  | 0.1  | 0.1  | 0.1  | 0.2  | 0.1  | 0.3  | 0.2  | 0.3  | 2.0   | 13.4%              |
| Pakistan                         | No  | Eastern Mediterranean | 0.0  | 0.1  | 0.0  | 0.1  | 0.1  | 0.1  | 0.4  | 0.4  | 0.1  | 0.2  | 0.2  | 0.1  | 0.2  | 0.1  | 0.3  | 2.4   | 21.2%              |
| Sierra Leone                     | Yes | Africa                | 0.2  | 0.2  | 0.2  | 0.2  | 0.6  | 0.5  | 0.5  | 2.7  | 2.3  | 1.0  | 1.3  | 2.7  | 3.9  | 2.5  | 1.1  | 19.7  | 15.2%              |
| Somalia                          | Yes | Africa                | 0.0  | 0.1  | 0.2  | 0.1  | 0.1  | 0.1  | 0.5  | 0.5  | 0.6  | 0.4  | 0.2  | 0.7  | 0.6  | 0.5  | 0.4  | 5.0   | 21.0%              |
| South Sudan                      | Yes | Africa                |      |      |      |      |      |      |      |      | 0.6  | 0.8  | 1.0  | 1.0  | 4.4  | 3.2  | 7.9  | 18.8  | 54.7%              |
| Sri Lanka                        | No  | South-East Asia       | 0.2  | 0.3  | 0.2  | 0.6  | 0.5  | 0.3  | 0.8  | 1.0  | 2.1  | 2.2  | 1.8  | 0.4  | 0.4  | 0.3  | 0.4  | 11.5  | 5.5%               |
| Sudan                            | Yes | Africa                | 0.0  | 0.1  | 0.1  | 0.1  | 0.2  | 0.4  | 0.3  | 0.1  | 0.3  | 0.3  | 0.2  | 0.2  | 0.2  | 0.2  | 0.4  | 3.0   | 19.5%              |
| Syrian Arab Republic             | No  | Eastern Mediterranean | 0.0  | 0.0  | 0.1  | 0.0  | 0.0  | 0.1  | 0.1  | 0.1  | 0.0  | 0.0  | 0.1  | 0.1  | 0.6  | 1.8  | 1.2  | 4.1   | 46.7%              |
| Timor-Leste                      | No  | South-East Asia       | 0.2  | 0.4  | 3.0  | 5.1  | 0.9  | 2.7  | 1.7  | 4.5  | 6.3  | 0.9  | 0.3  | 4.2  | 4.6  | 4.6  | 4.9  | 44.5  | 24.1%              |
| Uganda                           | Yes | Africa                | 0.2  | 0.2  | 0.5  | 0.7  | 0.4  | 0.4  | 0.4  | 0.2  | 0.3  | 0.3  | 0.6  | 0.9  | 1.2  | 0.7  | 0.6  | 7.5   | 7.2%               |
| Ukraine                          | No  | Europe                |      |      | 0.4  | 0.5  | 0.5  | 0.8  | 0.8  | 0.1  | 0.1  | 0.3  | 0.1  | 11.3 | 11.8 | 0.2  | 0.4  | 27.3  | -1.4%              |
| Yemen                            | No  | Eastern Mediterranean | 0.0  | 0.0  | 0.0  | 0.0  | 0.1  | 0.1  | 0.4  | 0.2  | 0.1  | 0.1  | 0.1  | 0.2  | 0.2  | 0.1  | 0.7  | 2.4   | 26.0%              |

**Note:**

1. If SSA is “Yes”, the country is a Sub-Saharan African country; If SSA is “No”, the country is not a Sub-Saharan African country.
2. Annual growth rate= $((\text{end value}/\text{start value})^{1/\text{periods}}) - 1$ .

**Appendix Figure 7. The proportion of development assistance (DA) for HIV/AIDS in total DA on reproductive health, maternal and newborn health, child health, and adolescent health (DA-RMNCAH) vs. the proportion of disability-adjusted life years (DALYs) caused by HIV/AIDS in total DALYs caused by RMNCAH in the 25 conflict-conflicted countries**

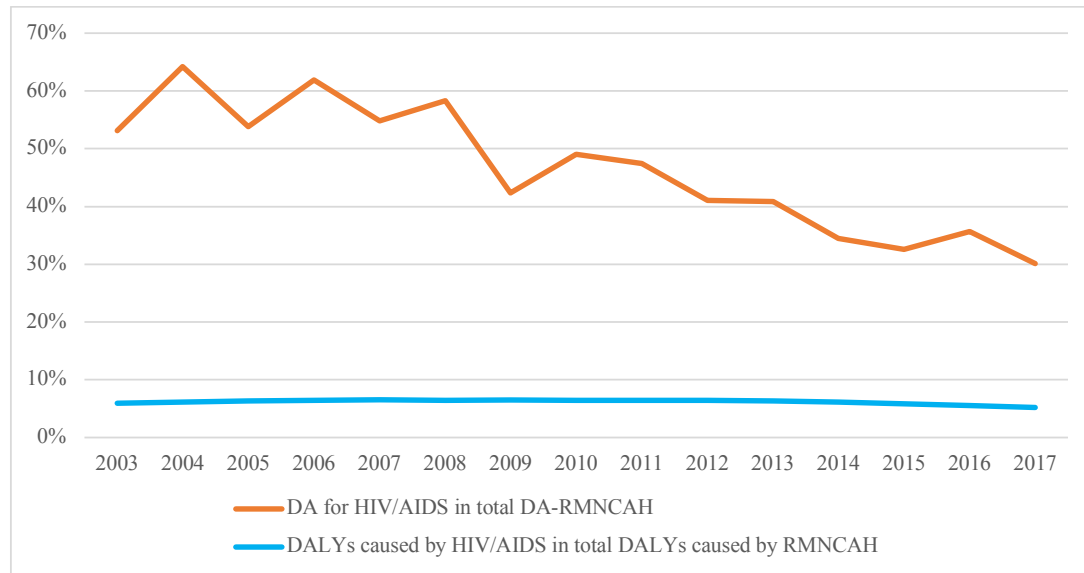

**Appendix Table 26. Distribution of development assistance (DA) for reproductive, maternal, newborn, child, and adolescent health (lower bound) Vs. Distribution of disability-adjusted life years (DALYs) by country, 2017**

|                                  | Reproductive health   |                         | Maternal and newborn health |            | Child health |            | Adolescent health |            |
|----------------------------------|-----------------------|-------------------------|-----------------------------|------------|--------------|------------|-------------------|------------|
|                                  | DA share <sup>1</sup> | DALY share <sup>2</sup> | DA share                    | DALY share | DA share     | DALY share | DA share          | DALY share |
| Afghanistan                      | 27.3%                 | 0.9%                    | 17.8%                       | 27.2%      | 54.0%        | 47.1%      | 0.9%              | 24.8%      |
| Angola                           | 78.5%                 | 12.8%                   | 11.2%                       | 20.7%      | 8.4%         | 48.6%      | 1.9%              | 18.0%      |
| Burundi                          | 66.3%                 | 5.2%                    | 11.2%                       | 21.2%      | 18.3%        | 54.8%      | 4.2%              | 18.8%      |
| Central African Republic         | 27.1%                 | 12.9%                   | 14.9%                       | 17.4%      | 53.3%        | 51.1%      | 4.7%              | 18.5%      |
| Chad                             | 21.8%                 | 4.9%                    | 27.5%                       | 21.9%      | 47.1%        | 60.9%      | 3.6%              | 12.3%      |
| Colombia                         | 34.7%                 | 5.6%                    | 43.2%                       | 18.5%      | 9.5%         | 23.1%      | 12.6%             | 52.8%      |
| Democratic Republic of the Congo | 39.9%                 | 6.4%                    | 18.9%                       | 19.5%      | 40.1%        | 56.1%      | 1.1%              | 18.0%      |
| Eritrea                          | 8.8%                  | 8.4%                    | 44.6%                       | 23.1%      | 28.8%        | 40.1%      | 17.7%             | 28.4%      |
| Iraq                             | 39.6%                 | 0.6%                    | 9.2%                        | 19.8%      | 43.9%        | 38.1%      | 7.4%              | 41.6%      |
| Liberia                          | 44.8%                 | 13.0%                   | 24.8%                       | 19.3%      | 26.6%        | 47.0%      | 3.9%              | 20.7%      |
| Libya                            | 20.2%                 | 1.7%                    | 17.7%                       | 10.6%      | 60.2%        | 29.8%      | 1.9%              | 57.8%      |
| Myanmar                          | 35.6%                 | 6.3%                    | 37.0%                       | 23.0%      | 26.8%        | 34.1%      | 0.7%              | 36.7%      |
| Nepal                            | 14.0%                 | 6.8%                    | 47.3%                       | 30.1%      | 36.3%        | 23.2%      | 2.3%              | 39.9%      |
| Nigeria                          | 45.1%                 | 13.1%                   | 20.4%                       | 21.4%      | 34.0%        | 52.3%      | 0.5%              | 13.2%      |
| Pakistan                         | 15.3%                 | 2.3%                    | 28.4%                       | 40.5%      | 53.8%        | 30.2%      | 2.5%              | 27.1%      |
| Sierra Leone                     | 39.4%                 | 5.8%                    | 28.2%                       | 22.0%      | 31.3%        | 57.1%      | 1.1%              | 15.1%      |
| Somalia                          | 22.4%                 | 6.1%                    | 25.2%                       | 19.7%      | 51.9%        | 54.6%      | 0.5%              | 19.7%      |
| South Sudan                      | 23.3%                 | 8.2%                    | 32.2%                       | 22.1%      | 44.1%        | 53.5%      | 0.3%              | 16.3%      |
| Sri Lanka                        | 18.4%                 | 1.4%                    | 60.9%                       | 16.9%      | 16.4%        | 21.9%      | 4.3%              | 59.8%      |
| Sudan                            | 21.2%                 | 4.9%                    | 26.7%                       | 26.8%      | 46.4%        | 46.3%      | 5.7%              | 22.0%      |
| Syrian Arab Republic             | 32.4%                 | 0.2%                    | 11.5%                       | 4.2%       | 52.6%        | 29.7%      | 3.5%              | 65.9%      |
| Timor-Leste                      | 25.7%                 | 8.5%                    | 22.7%                       | 25.9%      | 35.0%        | 34.1%      | 16.6%             | 31.6%      |
| Uganda                           | 73.1%                 | 17.2%                   | 10.0%                       | 21.4%      | 16.1%        | 39.9%      | 0.8%              | 21.5%      |
| Ukraine                          | 76.0%                 | 15.3%                   | 9.1%                        | 14.1%      | 13.3%        | 18.8%      | 1.6%              | 51.8%      |
| Yemen                            | 8.9%                  | 0.7%                    | 18.8%                       | 24.9%      | 71.9%        | 44.9%      | 0.4%              | 29.4%      |

**Note:**

1. “DA share” indicates share of DA for each health component in total DA for RMNCAH. For example, “DA share” for reproductive health means share of DA for reproductive health in total DA for RMNCAH.
2. “DALY share” indicates share of DALY for each health component in total DALYs attributable to RMNCAH. For example, “DALY share” for reproductive health means share of DALYs caused by reproductive health in total DALYs attributable to RMNCAH.

**Appendix Table 27. Total health expenditure per capita in the conflict-affected countries, 2003-2016**

| Countries                        | 2003  | 2004  | 2005  | 2006  | 2007  | 2008  | 2009  | 2010  | 2011  | 2012  | 2013  | 2014  | 2015  | 2016  |
|----------------------------------|-------|-------|-------|-------|-------|-------|-------|-------|-------|-------|-------|-------|-------|-------|
| Afghanistan                      | 17.7  | 21.2  | 24.7  | 28.7  | 32.2  | 39.1  | 42.8  | 46.1  | 52.1  | 52.8  | 56.6  | 60.8  | 60.7  | 57.9  |
| Angola                           | 35.1  | 50.1  | 54.5  | 70.2  | 93.5  | 136.7 | 121.1 | 97.7  | 123.5 | 123.6 | 145.3 | 133.2 | 109.9 | 96.3  |
| Burundi                          | 7.2   | 9.9   | 12.8  | 16.7  | 18.3  | 18.3  | 21.9  | 26.4  | 25.3  | 21.9  | 22.3  | 21.5  | 19.7  | 23.2  |
| Central African Republic         | 13.0  | 13.1  | 15.6  | 15.7  | 19.1  | 18.6  | 19.8  | 16.9  | 19.0  | 18.9  | 16.5  | 18.5  | 22.2  | 16.5  |
| Chad                             | 18.4  | 28.6  | 32.4  | 35.1  | 35.3  | 38.3  | 36.3  | 36.9  | 39.1  | 35.3  | 47.9  | 47.4  | 35.9  | 32.0  |
| Colombia                         | 129.0 | 143.4 | 189.2 | 216.7 | 272.5 | 331.4 | 332.9 | 395.3 | 423.5 | 453.1 | 471.7 | 464.5 | 368.0 | 344.1 |
| Democratic Republic of the Congo | 6.8   | 8.7   | 9.4   | 11.4  | 12.6  | 16.5  | 13.7  | 13.0  | 12.8  | 14.4  | 16.5  | 19.6  | 20.3  | 20.7  |
| Eritrea                          | 13.4  | 15.8  | 14.9  | 16.0  | 13.1  | 12.8  | 19.0  | 16.8  | 24.8  | 20.1  | 22.3  | 24.8  | 27.5  | 30.2  |
| Iraq                             | 28.5  | 54.1  | 54.2  | 57.3  | 98.3  | 131.1 | 164.9 | 147.1 | 165.2 | 180.9 | 196.9 | 189.1 | 156.2 | 154.3 |
| Liberia                          | 7.6   | 22.0  | 25.8  | 24.6  | 36.4  | 35.2  | 44.3  | 45.1  | 54.2  | 55.8  | 58.4  | 64.5  | 72.7  | 69.1  |
| Libya                            | 191.9 | 204.2 | 214.6 | 237.6 | 278.7 | 325.0 | 359.8 | 405.2 | 316.0 |       |       |       |       |       |
| Myanmar                          | 5.0   | 5.3   | 5.8   | 6.4   | 7.5   | 11.1  | 14.1  | 15.5  | 20.6  | 23.5  | 25.8  | 64.9  | 62.7  | 62.8  |
| Nepal                            | 11.5  | 13.4  | 14.7  | 14.2  | 17.7  | 19.4  | 21.4  | 30.3  | 34.7  | 33.9  | 35.1  | 41.5  | 45.6  | 46.0  |
| Nigeria                          | 35.1  | 39.0  | 47.1  | 61.2  | 68.6  | 82.3  | 68.7  | 76.7  | 84.5  | 92.8  | 102.9 | 108.4 | 98.6  | 80.2  |
| Pakistan                         | 15.1  | 16.4  | 20.9  | 26.4  | 30.1  | 27.3  | 25.5  | 26.9  | 28.8  | 28.8  | 31.9  | 36.9  | 38.3  | 40.0  |
| Sierra Leone                     | 29.2  | 29.5  | 32.6  | 33.9  | 36.4  | 40.6  | 43.6  | 44.2  | 59.8  | 60.2  | 83.1  | 141.3 | 121.1 | 87.3  |
| Sri Lanka                        | 42.9  | 51.5  | 58.0  | 66.2  | 74.7  | 94.1  | 101.7 | 109.8 | 120.8 | 115.3 | 140.1 | 140.3 | 153.0 | 154.8 |
| Sudan                            | 28.5  | 37.1  | 47.1  | 70.7  | 105.4 | 107.9 | 112.0 | 110.3 | 123.2 | 101.0 | 124.4 | 116.8 | 159.7 | 153.7 |
| Syria                            | 62.0  | 62.4  | 64.5  | 66.8  | 77.2  | 88.8  | 93.2  | 95.3  | 84.1  | 66.9  |       |       |       |       |
| Timor-Leste                      | 14.7  | 19.1  | 24.0  | 26.3  | 28.9  | 42.3  | 49.2  | 52.0  | 63.7  | 70.9  | 82.6  | 79.7  | 88.4  | 80.8  |
| Uganda                           | 22.1  | 31.2  | 38.6  | 43.8  | 52.1  | 57.4  | 55.8  | 63.4  | 54.3  | 53.9  | 50.2  | 48.7  | 40.2  | 38.0  |
| Ukraine                          | 69.7  | 85.5  | 117.6 | 150.0 | 187.9 | 218.0 | 170.0 | 209.6 | 246.7 | 278.9 | 302.1 | 199.5 | 143.3 | 142.7 |
| Yemen                            | 35.2  | 38.6  | 42.8  | 50.4  | 58.6  | 70.1  | 66.2  | 68.3  | 65.1  | 74.6  | 79.2  | 80.6  | 72.8  |       |

Note:

1. Data source: National Health Account by WHO. Available at <http://apps.who.int/nha/database/ViewData/Indicators/en> (Accessed at June 3rd, 2019)
2. All expenditure data are converted to constant 2015 US\$.
3. Somalia and South Sudan are not included in the National Health Account.
4. Expenditure data of year 2017 is not available at National Health Account.
